# Supplementary material
Source: PubMed Central journal article supplement (PMC9233935)
Supplement: NIHMS1817745-supplement-Govender_et_al_supplemental_information.pdf [file NIHMS1817745-supplement-Govender_et_al_supplemental_information.pdf]

## Supporting Information

# Spiropyrimidinetriene DNA gyrase inhibitors with potent and selective antituberculosis activity

*Preshendren Govender,<sup>a</sup> Rudolf Müller,<sup>a</sup> Kawaljit Singh,<sup>a</sup> Virsinha Reddy,<sup>a</sup> Charles J.*

*Eyermann,<sup>a</sup> Stephen Fienberg,<sup>a</sup> Sandeep R. Ghorpade,<sup>a</sup> Lizbé Koekemoer,<sup>b</sup> Alissa Myrick,<sup>b#</sup>*

*Dirk Schnappinger,<sup>c</sup> Curtis Engelhart,<sup>c</sup> Jaclynn Meshanni,<sup>c,d</sup> Jo Ann W. Byl,<sup>e</sup> Neil*

*Osheroff,<sup>e,f,g</sup> Vinayak Singh,<sup>a,b</sup> Kelly Chibale<sup>a,b\*</sup> and Gregory S. Basarab<sup>a,h\*</sup>*

<sup>a</sup>Drug Discovery and Development Centre (H3D), Department of Chemistry, University of Cape Town, Rondebosch 7701, South Africa; <sup>b</sup>Drug Discovery and Development Centre (H3D) South African Medical Research Council Drug Discovery and Development Research Unit, Department of Chemistry and Institute of Infectious Disease and Molecular Medicine, University of Cape Town, Rondebosch 7701, South Africa; <sup>c</sup>Department of Microbiology and Immunology, Weill Cornell Medical College, New York, NY 10065 United States; <sup>d</sup>Current affiliation: Department of Pharmacology and Toxicology, Rutgers University Ernest Mario School of Pharmacy, Piscataway, NJ 08854 United States; <sup>e</sup>Department of Biochemistry, Vanderbilt University School of Medicine, Nashville, TN 37232 United States; <sup>f</sup>Department of Medicine (Hematology/Oncology), Vanderbilt University School of Medicine, Nashville, TN 37232 United States; <sup>g</sup>VA Tennessee Valley Healthcare System, Nashville, Tennessee 37212, United States; <sup>h</sup>Drug Discovery and Development Centre (H3D), Division of Clinical Pharmacology, Department of Medicine, University of Cape Town, Observatory, 7935, South Africa; <sup>#</sup>Deceased.

### \*Corresponding Authors

\*Phone: +1-814-826-5988. E-mail: [greg.basarab@uct.ac.za](mailto:greg.basarab@uct.ac.za)

\*Phone: +27 21 650 2553. E-mail: [kelly.chibale@uct.ac.za](mailto:kelly.chibale@uct.ac.za)

## Table of contents

|                                                                                  | Page     |
|----------------------------------------------------------------------------------|----------|
| 1. Figure S1 – Illustrations of moxifloxacin and QPT-1 crystal structures        | S3       |
| 2. Figure S2 – Illustration of QPT-1 docking validation in <i>Mtb</i> DNA Gyrase | S3       |
| 3. Synthesis and characterization of intermediates                               | S4-S34   |
| 4. Characterization of inactive isomers with unwanted configuration              | S34-S49  |
| 5. DNA gyrase supercoiling assay                                                 | S49-S50  |
| 6. <i>In vitro</i> ADMET assays                                                  | S50-S51  |
| 6.1 Kinetic solubility                                                           |          |
| 6.2 Lipophilicity (LogD <sub>7.4</sub> )                                         |          |
| 6.3 Cytotoxicity                                                                 |          |
| 7. Sequence alignments                                                           | S52-S53  |
| 8. QC data for selected compounds (NMR spectra and UPLC-MS traces)               | S54-S122 |
| 9. References                                                                    | S123     |

## 1. Illustrations of moxifloxacin and QPT-1 crystal structures

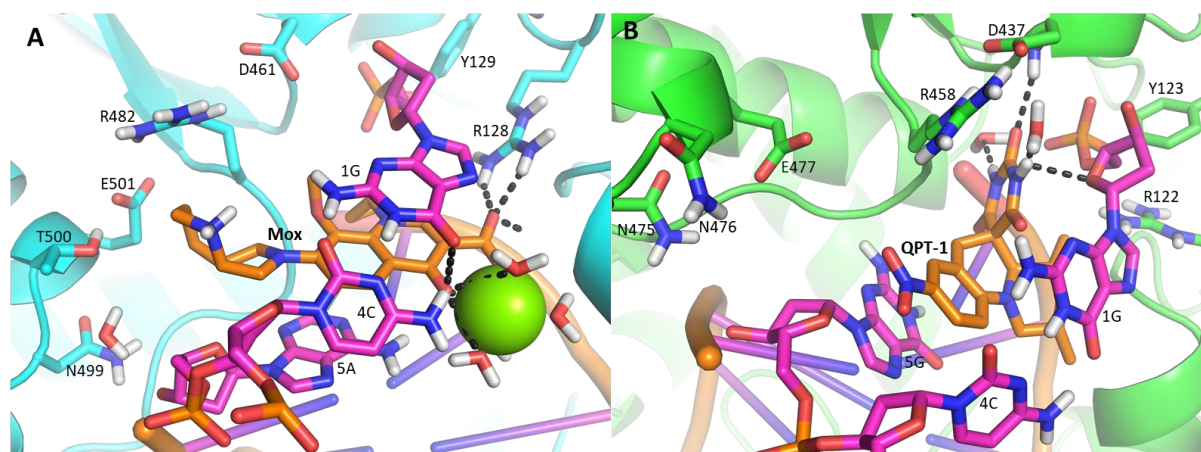

**Figure S1** (A) Illustration of the moxifloxacin (orange carbons) and  $Mg^{2+}$  binding mode in *Mtb* DNA-gyrase (from PDB 5BS8). (B) Illustration of the QPT-1 (orange carbons) binding mode in *S. aureus* DNA gyrase (from PDB 5CDM).

## 2. Illustration of QPT-1 docking validation in *Mtb* DNA Gyrase

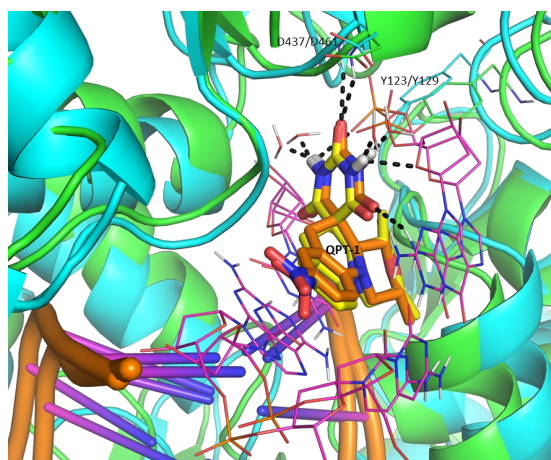

**Figure S2:** Overlay of QPT-1 (orange) docked into the transposed *Mtb* gyrase (cyan) onto the co-crystal structure of QPT-1 (yellow) bound to *S. aureus* gyrase (PDB ID: 5CDM). The docked QPT-1 ligand structure aligned very closely with the co-crystal QPT-1 with an RMSD = 0.636 Å and key binding interactions were maintained.

### 3. Synthesis and characterization of intermediates

#### Intermediates from Scheme 2

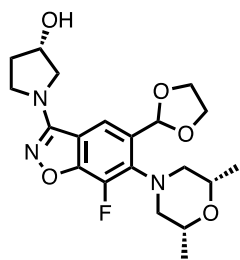

*(S)*-1-(6-((2*R*,6*S*)-2,6-dimethylmorpholino)-5-(1,3-dioxolan-2-yl)-7-fluorobenzo[*d*]isoxazol-3-yl)pyrrolidin-3-ol (**48a**). In a sealed tube, a mixture of **47** (497 mg, 1.39 mmol), and 2,3,4,6,7,8,9,10-octahydropyrimido[1,2-*a*]azepine (0.48 mL, 5.58 mmol) and (*S*)-pyrrolidine-3-ol (243 mg, 2.81 mmol) in acetonitrile (2 ml) were heated to 90 °C for 16h. A red-brown solution was obtained and cooled to RT. Solvent was removed to afford a brown residue. The material was purified by flash chromatography on silica gel using hexane:EtOAc (20:80 gradient elution) to give the title compound as a red-brown oil (492 mg, 87%). RP-HPLC  $t_R$  = 2.564 min (method 1, purity 80%); LC-MS ESI,  $m/z$  408.0 [M+H]<sup>+</sup> (anal. calcd. for C<sub>20</sub>H<sub>26</sub>FN<sub>3</sub>O<sub>5</sub>,  $m/z$  407.4).

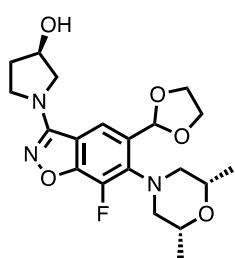

*(R)*-1-(6-((2*R*,6*S*)-2,6-dimethylmorpholino)-5-(1,3-dioxolan-2-yl)-7-fluorobenzo[*d*]isoxazol-3-yl)pyrrolidin-3-ol (**48b**). Prepared following the preparation of **48a** using **47** (147 mg, 0.41 mmol), 2,3,4,6,7,8,9,10-octahydropyrimido[1,2-*a*]azepine (0.25 mL, 1.64 mmol) and (*R*)-pyrrolidine-3-ol (72 mg, 0.82 mmol). Column chromatography on silica gel using hexane:EtOAc (20:80 gradient). Red-brown oil (116 mg, 69%). RP-HPLC  $t_R$  = 3.501 min

(method 1, purity 99%); LC-MS ESI,  $m/z$  408.1  $[M+H]^+$  (anal. calcd. for  $C_{20}H_{26}FN_3O_5$ ,  $m/z = 407.4$ ).

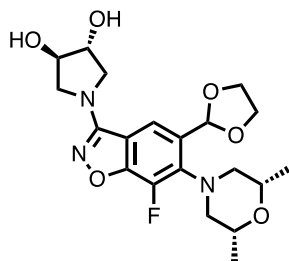

*(3R,4R)*-1-(6-((2*R*,6*S*)-2,6-dimethylmorpholino)-5-(1,3-dioxolan-2-yl)-7-

*fluorobenzo[d]isoxazol-3-yl)pyrrolidine-3,4-diol (48c)*. Prepared following the preparation of **48a** using **47** (501 mg, 1.40 mmol), 2,3,4,6,7,8,9,10-octahydropyrimido[1,2-*a*]azepine (0.25 mL, 1.69 mmol) and (3*R*,4*R*)-pyrrolidine-3,4-diol (290 mg, 2.81 mmol). Column chromatography on silica gel using DCM:MeOH (95:5 gradient). Off-white solid (481 mg, 81%). RP-HPLC  $t_R = 2.760$  min (method 1, purity 95%); LC-MS ESI,  $m/z$  424.0  $[M+H]^+$  (anal. calcd. for  $C_{20}H_{26}FN_3O_6$ ,  $m/z = 423.4$ ).

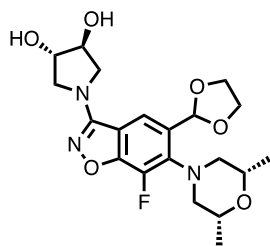

*(3S,4S)*-1-(6-((2*R*,6*S*)-2,6-dimethylmorpholino)-5-(1,3-dioxolan-2-yl)-7-

*fluorobenzo[d]isoxazol-3-yl)pyrrolidine-3,4-diol (48d)*. Prepared following the preparation of **48a** using **47** (143 mg, 0.40 mmol), 2,3,4,6,7,8,9,10-octahydropyrimido[1,2-*a*]azepine (0.072 mL, 0.48 mmol) and (3*S*,4*S*)-pyrrolidine-3,4-diol (83 mg, 0.80 mmol). Column chromatography using DCM:MeOH (95:5 gradient). Off-white solid (170 mg, 95%). RP-HPLC  $t_R = 2.922$  min (method 1, purity 95%); LC-MS ESI,  $m/z$  424.0  $[M+H]^+$  (anal. calcd. for  $C_{20}H_{26}FN_3O_6$ ,  $m/z = 423.4$ ).

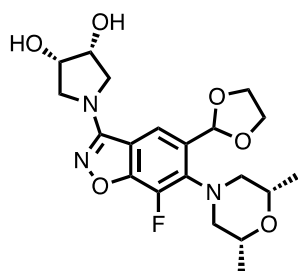

(3*R*,4*S*)-1-(6-((2*R*,6*S*)-2,6-dimethylmorpholino)-5-(1,3-dioxolan-2-yl)-7-

fluorobenzo[*d*]isoxazol-3-yl)pyrrolidine-3,4-diol (**48e**). Prepared following the preparation of **48a** using **47** (146 mg, 0.41 mmol), 2,3,4,6,7,8,9,10-octahydropyrimido[1,2-*a*]azepine (0.20 mL, 1.31 mmol) and (3*R*,4*S*)-pyrrolidine-3,4-diol hydrochloride (114 mg, 0.82 mmol). Column chromatography on silica gel using DCM:MeOH (95:5 gradient). Off-white solid (134 mg, 76%). RP-HPLC  $t_R$  = 3.501 min (method 1, purity 98%); LC-MS ESI,  $m/z$  424.0 [M+H]<sup>+</sup> (anal. calcd. for C<sub>20</sub>H<sub>26</sub>FN<sub>3</sub>O<sub>6</sub>,  $m/z$  = 423.4).

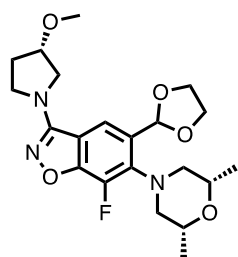

6-((2*R*,6*S*)-2,6-dimethylmorpholino)-5-(1,3-dioxolan-2-yl)-7-fluoro-3-((*S*)-3-

methoxypyrrolidin-1-yl)benzo[*d*]isoxazole (**48f**). Prepared following the preparation of **48a** using **47** (147 mg, 0.41 mmol), 2,3,4,6,7,8,9,10-octahydropyrimido[1,2-*a*]azepine (0.075 mL, 0.50 mmol) and (*S*)-3-methoxypyrrolidine (84 mg, 0.83 mmol). Column chromatography on silica gel using DCM:MeOH (95:5 gradient). Off-white solid (121 mg, 68%). RP-HPLC  $t_R$  = 3.495 min (method 1, purity 98%); LC-MS ESI,  $m/z$  422.2 [M+H]<sup>+</sup> (anal. calcd. for C<sub>21</sub>H<sub>28</sub>FN<sub>3</sub>O<sub>5</sub>,  $m/z$  = 421.5).

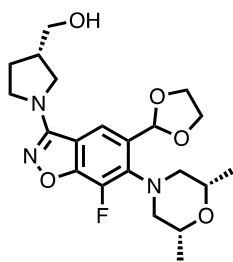

*((S)-1-(6-((2R,6S)-2,6-dimethylmorpholino)-5-(1,3-dioxolan-2-yl)-7-fluorobenzo[d]isoxazol-3-yl)pyrrolidin-3-yl)methanol (48g)*. Prepared following the preparation of **48a** using **47** (300 mg, 0.84 mmol), 2,3,4,6,7,8,9,10-octahydropyrimido[1,2-*a*]azepine (0.51 mL, 3.36 mmol) and (*S*)-pyrrolidin-3-ylmethanol (170 mg, 1.68 mmol). Column chromatography on silica gel using hexane:EtOAc (20:80 gradient). Off-white solid (279 mg, 73%). RP-UPLC  $t_R = 1.014$  min (method 2, purity 92%); LC-MS ESI,  $m/z$  422.1  $[M+H]^+$  (anal. calcd. for  $C_{21}H_{28}FN_3O_5$ ,  $m/z = 421.5$ ).

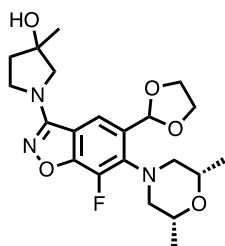

*1-(6-((2R,6S)-2,6-dimethylmorpholino)-5-(1,3-dioxolan-2-yl)-7-fluorobenzo[d]isoxazol-3-yl)-3-methylpyrrolidin-3-ol (48h)*. Prepared following the preparation of **48a** using **47** (304 mg, 0.85 mmol), 2,3,4,6,7,8,9,10-octahydropyrimido[1,2-*a*]azepine (0.51 mL, 3.41 mmol) and 3-methylpyrrolidin-3-ol (172 mg, 1.70 mmol). Column chromatography on silica gel using DCM:MeOH (90:10 gradient). Pale-yellow oil (323 mg, 87%). RP-UPLC  $t_R = 1.058$  min (method 2, purity 98%); LC-MS ESI,  $m/z$  422.2  $[M+H]^+$  (anal. calcd. for  $C_{21}H_{28}FN_3O_5$ ,  $m/z = 421.5$ ).

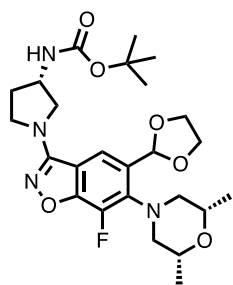

*tert-butyl* ((*S*)-1-(6-((2*R*,6*S*)-2,6-dimethylmorpholino)-5-(1,3-dioxolan-2-yl)-7-fluorobenzo[*d*]isoxazol-3-yl)pyrrolidin-3-yl)carbamate (**48i**). Prepared following the preparation of **48a** using **47** (302 mg, 0.85 mmol), 2,3,4,6,7,8,9,10-octahydropyrimido[1,2-*a*]azepine (0.51 mL, 3.39 mmol) and *tert*-butyl (*S*)-pyrrolidin-3-ylcarbamate (315 mg, 1.69 mmol). Column chromatography on silica gel using hexane:EtOAc (20:80 gradient). Off-white solid (192 mg, 43%). RP-UPLC  $t_R$  = 1.203 min (method 2, purity 95%); LC-MS ESI,  $m/z$  507.1 [M+H]<sup>+</sup> (anal. calcd. for C<sub>25</sub>H<sub>35</sub>FN<sub>4</sub>O<sub>6</sub>,  $m/z$  = 506.6).

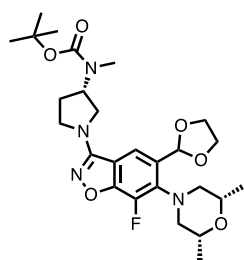

*tert-butyl* ((*S*)-1-(6-((2*R*,6*S*)-2,6-dimethylmorpholino)-5-(1,3-dioxolan-2-yl)-7-fluorobenzo[*d*]isoxazol-3-yl)pyrrolidin-3-yl)(methyl)carbamate (**48j**). Prepared following the preparation of **48a** using **47** (303 mg, 0.85 mmol), 2,3,4,6,7,8,9,10-octahydropyrimido[1,2-*a*]azepine (0.51 mL, 3.40 mmol) and *tert*-butyl (*R*)-methyl(pyrrolidin-3-yl)carbamate (340 mg, 1.70 mmol). Column chromatography on silica gel using hexane:EtOAc (20:80 gradient). Off-white solid (365 mg, 79%). RP-UPLC  $t_R$  = 1.269 min (method 2, purity 96%); LC-MS ESI,  $m/z$  521.1 [M+H]<sup>+</sup> (anal. calcd. for C<sub>26</sub>H<sub>37</sub>FN<sub>4</sub>O<sub>6</sub>,  $m/z$  = 520.6).



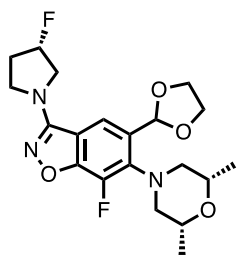

6-((2R,6S)-2,6-dimethylmorpholino)-5-(1,3-dioxolan-2-yl)-7-fluoro-3-((S)-3-fluoropyrrolidin-1-yl)benzo[d]isoxazole (**4k**). Prepared following the preparation of **48a** using **47** (308 mg, 0.86 mmol), 2,3,4,6,7,8,9,10-octahydropyrimido[1,2-*a*]azepine (0.52 mL, 3.45 mmol) and (*S*)-3-fluoropyrrolidine (154 mg, 1.72 mmol). Column chromatography on silica gel using hexane:EtOAc (20:80 gradient). Pale-yellow oil (247 mg, 68%). RP-UPLC  $t_R$  = 1.168 min (method 2, purity 97%); LC-MS ESI,  $m/z$  410.2  $[M+H]^+$  (anal. calcd. for  $C_{20}H_{25}F_2N_3O_4$ ,  $m/z$  = 409.4).

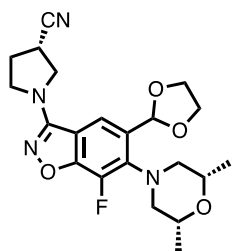

(*S*)-1-(6-((2R,6S)-2,6-dimethylmorpholino)-5-(1,3-dioxolan-2-yl)-7-fluorobenzo[d]isoxazol-3-yl)pyrrolidine-3-carbonitrile (**48l**). Prepared following the preparation of **48a** using **47** (142 mg, 0.40 mmol), 2,3,4,6,7,8,9,10-octahydropyrimido[1,2-*a*]azepine (0.13 mL, 0.88 mmol) and (*S*)-pyrrolidine-3-carbonitrile (105 mg, 0.80 mmol). Column chromatography on silica gel using hexane:EtOAc (20:80 gradient). Off-white solid (152 mg, 90%). RP-HPLC  $t_R$  = 3.509 min (method 1, purity 99%); LC-MS ESI,  $m/z$  417.0  $[M+H]^+$  (anal. calcd. for  $C_{21}H_{25}FN_4O_4$ ,  $m/z$  = 416.5).

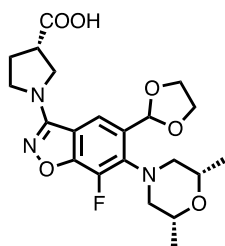

(*S*)-1-(6-((2*R*,6*S*)-2,6-dimethylmorpholino)-5-(1,3-dioxolan-2-yl)-7-fluorobenzo[*d*]isoxazol-3-yl)pyrrolidine-3-carboxylic acid (**48m**). Prepared following the preparation of **47** (300 mg, 0.84 mmol), 2,3,4,6,7,8,9,10-octahydropyrimido[1,2-*a*]azepine (0.51 mL, 3.36 mmol) and (*S*)-pyrrolidine-3-carboxylic acid (194 mg, 1.68 mmol). Column chromatography on silica gel using DCM:0.5M NH<sub>3</sub> in MeOH (80:20 gradient). Off-white solid (280 mg, 77%). RP-UPLC *t*<sub>R</sub> = 1.018 min (method 2, purity 97%); LC-MS ESI, *m/z* 436.1 [M+H]<sup>+</sup> (anal. calcd. for C<sub>21</sub>H<sub>26</sub>FN<sub>3</sub>O<sub>6</sub>, *m/z* = 435.5).

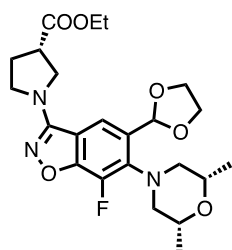

ethyl (*S*)-1-((2*R*,4*S*,4*aS*)-11-fluoro-2,4-dimethyl-2',4',6'-trioxo-1,1',2,3',4,4*a*,4',6'-octahydro-2'*H*,6'*H*-spiro[isoxazolo[4,5-*g*][1,4]oxazino[4,3-*a*]quinoline-5,5'-pyrimidin]-8-yl)pyrrolidine-3-carboxylate (**S1**). Prepared following the preparation of **8** using **48m** (355 mg, 0.79 mmol) and pyrimidine-2,4,6(1*H*, 3*H*, 5*H*)-trione (111 mg, 0.86 mmol). Chiral column chromatography using hexane:EtOH:EtOAc (70:10:20, isocratic, 15mL/min, Diacel IA column). White solid (11 mg, 3%). <sup>1</sup>H NMR (300 MHz, MeOD) δ 7.19 (s, 1H), 4.25 – 4.17 (m, 2H), 4.09 – 4.02 (m, 1H), 3.97 – 3.85 (m, 1H), 3.85 – 3.71 (m, 3H), 3.72 – 3.56 (m, 2H), 3.19 – 3.06 (m, 2H), 3.06 – 2.95 (m, 2H), 2.44 – 2.20 (m, 2H), 1.32 – 1.26 (m, 4H), 1.22 (d, *J* = 6.2 Hz, 3H), 1.01 (d, *J* = 6.3 Hz, 3H). <sup>13</sup>C NMR (151 MHz, MeOD) δ 173.40, 171.78, 168.40, 158.15, 153.18 (d, *J* = 12.8 Hz), 150.37, 134.73 (d, *J* = 239.9 Hz), 134.65, 120.99, 115.54 (d, *J* =

3.3 Hz), 108.29, 72.72, 72.22, 64.93, 60.72, 56.51 (d,  $J = 9.7$  Hz), 50.29, 42.86, 42.14, 39.61, 28.32, 17.35, 17.04, 13.07, 10.47. RP-UPLC  $t_R = 1.027$  min (method 2, purity 99%); LC-MS ESI,  $m/z$  528.2  $[M-H]^-$  (anal. calcd. for  $C_{22}H_{28}FN_5O_7$ ,  $m/z = 529.5$ ).  $[\alpha]_D^{20} = -128.4^\circ$  (c 0.14, MeOH).

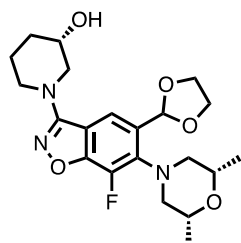

*(S)*-1-(6-((2*R*,6*S*)-2,6-dimethylmorpholino)-5-(1,3-dioxolan-2-yl)-7-fluorobenzo[*d*]isoxazol-3-yl)piperidin-3-ol (**48n**). Prepared following the preparation of **48a** using **47** (307 mg, 0.86 mmol), 2,3,4,6,7,8,9,10-octahydropyrimido[1,2-*a*]azepine (0.52 mL, 3.44 mmol) and *(S)*-piperidin-3-ol (174 mg, 1.72 mmol). Column chromatography on silica gel using hexane:EtOAc (20:80 gradient). Off-white solid (109 mg, 30%). RP-HPLC  $t_R = 3.905$  min (method 1, purity 98%); LC-MS ESI,  $m/z$  422.0  $[M+H]^+$  (anal. calcd. for  $C_{21}H_{28}FN_3O_5$ ,  $m/z = 421.5$ ).

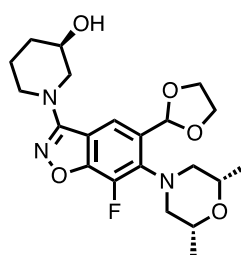

*(R)*-1-(6-((2*R*,6*S*)-2,6-dimethylmorpholino)-5-(1,3-dioxolan-2-yl)-7-fluorobenzo[*d*]isoxazol-3-yl)piperidin-3-ol (**48o**). Prepared following the preparation of **48a** using **47** (300 mg, 0.84 mmol), 2,3,4,6,7,8,9,10-octahydropyrimido[1,2-*a*]azepine (0.51 mL, 3.37 mmol) and *(R)*-piperidin-3-ol (170 mg, 1.68 mmol). Column chromatography using hexane:EtOAc (20:80

gradient). Off-white solid (251 mg, 71%). RP-HPLC  $t_R = 3.887$  min (method 1, purity 100%); LC-MS ESI,  $m/z$  422.0  $[M+H]^+$  (anal. calcd. for  $C_{21}H_{28}FN_3O_5$ ,  $m/z = 421.5$ ).

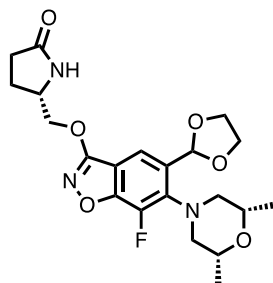

(*S*)-5-(((6-((2*R*,6*S*)-2,6-dimethylmorpholino)-5-(1,3-dioxolan-2-yl)-7-fluorobenzo[*d*]isoxazol-3-yl)oxy)methyl)pyrrolidin-2-one (**48p**). In a sealed tube, a mixture of (*S*)-5-(hydroxymethyl)pyrrolidin-2-one (194 mg, 1.68 mmol) and sodium hydride 60% dispersion in mineral oil (135 mg, 3.36 mmol) in *N,N*-dimethylformamide (2mL) were stirred at 0°C for 30min. This was followed but the slow addition of **47** (300 mg, 0.841 mmol) in *N,N*-dimethylformamide (1mL) at 0°C and warmed to room temperature. The reaction mixture was then stirred at 30°C for 1 h. The reaction was cooled and a dark orange suspension was obtained. The reaction mixture was diluted with 10mL ethyl acetate and washed with 2x10mL of 10% LiCl solution. The organic fractions were combined, dried over  $Na_2SO_4$  and solvent was removed to afford a pale yellow residue. The material was purified by flash chromatography on silica gel using DCM:MeOH (90:10 gradient elution) to give the title compound as a pale yellow oil (289 mg, 73%). RP-UPLC  $t_R = 1.036$  min (method 2, purity 92%); LC-MS ESI,  $m/z$  436.1  $[M+H]^+$  (anal. calcd. for  $C_{21}H_{26}FN_3O_6$ ,  $m/z$  435.5).

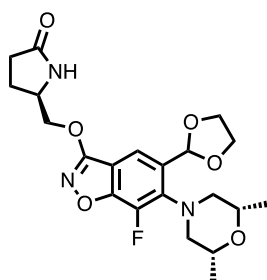

(*R*)-5-(((6-((2*R*,6*S*)-2,6-dimethylmorpholino)-5-(1,3-dioxolan-2-yl)-7-

fluorobenzo[*d*]isoxazol-3-yl)oxy)methyl)pyrrolidin-2-one (**48q**). Prepared following the preparation of **48p** using **47** (300 mg, 0.84 mmol), sodium hydride 60% dispersion in mineral oil (37 mg, 0.92 mmol), and (*R*)-5-(hydroxymethyl)pyrrolidin-2-one (194 mg, 1.68 mmol). Column chromatography on silica gel using DCM:MeOH (90:10 gradient). Pale-yellow oil (346 mg, 95%). RP-UPLC  $t_R = 1.037$  min (method 2, purity 100%); LC-MS ESI,  $m/z$  436.1 [M+H]<sup>+</sup> (anal. calcd. for C<sub>21</sub>H<sub>26</sub>FN<sub>3</sub>O<sub>6</sub>,  $m/z = 435.5$ ).

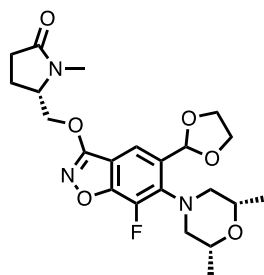

(*S*)-5-(((6-((2*R*,6*S*)-2,6-dimethylmorpholino)-5-(1,3-dioxolan-2-yl)-7-fluorobenzo[*d*]isoxazol-3-yl)oxy)methyl)-1-methylpyrrolidin-2-one (**48r**). (*S*)-5-(((6-((2*R*,6*S*)-2,6-

dimethylmorpholino)-5-(1,3-dioxolan-2-yl)-7-fluorobenzo[*d*]isoxazol-3-

yl)oxy)methyl)pyrrolidin-2-one **48p** (300 mg, 0.69 mmol) was dissolved in *N,N*-dimethylformamide (5mL) and cooled to 0°C. Sodium hydride 60% dispersion in mineral oil (41 mg, 1.03 mmol) was added to the reaction mixture and stirred for 1 h. Then, iodomethane (643  $\mu$ L, 1.03 mmol) was added slowly. The mixture was warmed to room temperature and stirred for another 1 h at this temperature. The reaction mixture was diluted with 10mL ethyl acetate and washed with 2x10mL of 10% LiCl solution. The organic fractions were combined, dried over Na<sub>2</sub>SO<sub>4</sub> and solvent was removed to afford a dark residue. The material was purified by flash chromatography on silica gel using DCM:MeOH (90:10 gradient elution) to give the title compound as a pale yellow oil (202 mg, 65%). RP-UPLC  $t_R = 1.080$  min (method 2, purity 100%); LC-MS ESI,  $m/z$  450.1 [M+H]<sup>+</sup> (anal. calcd. for C<sub>22</sub>H<sub>28</sub>FN<sub>3</sub>O<sub>6</sub>,  $m/z = 449.5$ ).

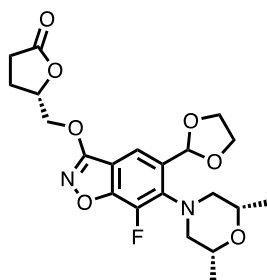

(*S*)-5-(((6-((2*R*,6*S*)-2,6-dimethylmorpholino)-5-(1,3-dioxolan-2-yl)-7-fluorobenzo[*d*]isoxazol-3-yl)oxy)methyl)dihydrofuran-2(3*H*)-one (**48s**). In a sealed tube, a mixture of (*S*)-5-(hydroxymethyl)dihydrofuran-2(3*H*)-one (423.1 mg, 3.64 mmol), **47** (650 mg, 1.82 mmol) and cesium carbonate (2.37 g, 7.29 mmol) in *N,N*-dimethylformamide (2mL) were heated to 90 °C for 32h. The reaction mixture was cooled to room temperature and solvent was removed to afford an orange residue. The material was purified by flash chromatography on silica gel using hexane:EtOAc (20:80 gradient elution) to give the title compound as a pale yellow oil (247 mg, 31%). RP-UPLC  $t_R$  = 1.115 min (method 2, purity 100%); LC-MS ESI,  $m/z$  437.1 [M+H]<sup>+</sup> (anal. calcd. for C<sub>21</sub>H<sub>25</sub>FN<sub>2</sub>O<sub>7</sub>,  $m/z$  436.4).

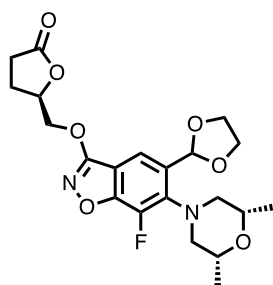

(*R*)-5-(((6-((2*R*,6*S*)-2,6-dimethylmorpholino)-5-(1,3-dioxolan-2-yl)-7-fluorobenzo[*d*]isoxazol-3-yl)oxy)methyl)dihydrofuran-2(3*H*)-one (**48t**). Prepared following the preparation of **48p** using **47** (650 mg, 1.82 mmol), (*R*)-5-(hydroxymethyl)dihydrofuran-2(3*H*)-one (423 mg, 7.29 mmol), and cesium carbonate (2.37 g, 7.29 mmol). Column chromatography on silica gel using hexane:EtOAc (20:80 gradient). Pale-yellow oil (191 mg, 24%). <sup>1</sup>H NMR (300 MHz, DMSO-*d*<sub>6</sub>) δ 7.60 (d,  $J$  = 0.8 Hz, 1H), 6.13 (s, 1H), 4.98 (tt,  $J$  =

7.2, 3.4 Hz, 1H), 4.69 – 4.50 (m, 2H), 4.18 – 3.94 (m, 4H), 3.82 – 3.69 (m, 2H), 3.07 (d,  $J = 11.0$  Hz, 2H), 2.90 – 2.78 (m, 2H), 2.64 – 2.56 (m, 2H), 2.45 – 2.25 (m, 1H), 2.20 – 2.03 (m, 1H), 1.09 (d,  $J = 6.2$  Hz, 6H). RP-UPLC  $t_R = 1.064$  min (method 2, purity, 99%); LC-MS ESI,  $m/z$  437.0  $[M+H]^+$  (anal. calcd. for  $C_{21}H_{25}FN_2O_7$ ,  $m/z = 436.4$ ).

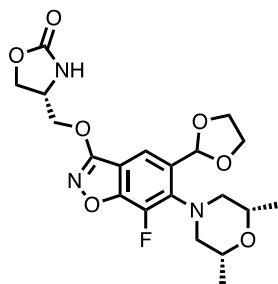

(*R*)-4-(((6-((2*R*,6*S*)-2,6-dimethylmorpholino)-5-(1,3-dioxolan-2-yl)-7-fluorobenzo[*d*]isoxazol-3-yl)oxy)methyl)oxazolidin-2-one (**48u**). Prepared following the preparation of **48p** using **47** (300 mg, 0.84 mmol), sodium hydride 60% dispersion in mineral oil (67 mg, 1.68 mmol), and (*R*)-4-(hydroxymethyl)oxazolidin-2-one (197 mg, 1.68 mmol). Column chromatography on silica gel using hexane:EtOAc (40:60 gradient). Pale-yellow oil (276 mg, 72%). RP-UPLC  $t_R = 1.025$  min (method 2, purity 96%); LC-MS ESI,  $m/z$  438.0  $[M+H]^+$  (anal. calcd. for  $C_{20}H_{24}FN_3O_7$ ,  $m/z = 437.4$ ).

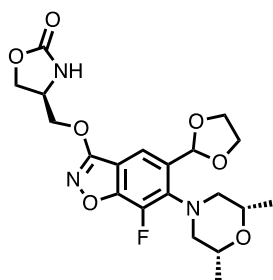

(*S*)-4-(((6-((2*R*,6*S*)-2,6-dimethylmorpholino)-5-(1,3-dioxolan-2-yl)-7-fluorobenzo[*d*]isoxazol-3-yl)oxy)methyl)oxazolidin-2-one (**48v**). Prepared following the preparation of **48p** using **47** (300 mg, 0.84 mmol), sodium hydride 60% dispersion in mineral oil (67 mg, 1.68 mmol), and (*S*)-4-(hydroxymethyl)oxazolidin-2-one (197 mg, 1.68 mmol). Column chromatography on

silica gel using hexane:EtOAc (40:60 gradient). Pale-yellow oil (281 mg, 74%). RP-UPLC  $t_R$  = 1.024 min (method 2, purity 97%); LC-MS ESI,  $m/z$  438.0  $[M+H]^+$  (anal. calcd. for  $C_{20}H_{24}FN_3O_7$ ,  $m/z$  = 437.4).

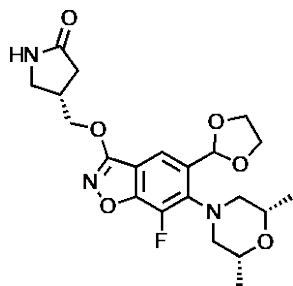

(*S*)-4-(((6-((2*R*,6*S*)-2,6-dimethylmorpholino)-5-(1,3-dioxolan-2-yl)-7-fluorobenzo[*d*]isoxazol-3-yl)oxy)methyl)pyrrolidin-2-one (**48w**). Prepared following the preparation of **48p** using **47** (300 mg, 0.84 mmol), sodium hydride 60% dispersion in mineral oil (175 mg, 4.37 mmol), and (*S*)-4-(hydroxymethyl)pyrrolidin-2-one<sup>1</sup> (252 mg, 2.19 mmol). Column chromatography on silica gel using DCM:MeOH (90:10 gradient). Pale-yellow oil (282 mg, 77%). RP-UPLC  $t_R$  = 1.026 min (method 2, purity 100%); LC-MS ESI,  $m/z$  436.1  $[M+H]^+$  (anal. calcd. for  $C_{21}H_{26}FN_3O_6$ ,  $m/z$  = 435.5).

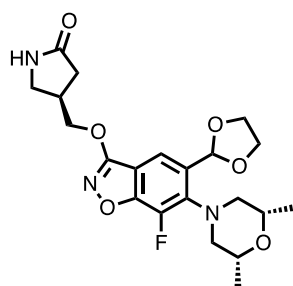

(*R*)-4-(((6-((2*R*,6*S*)-2,6-dimethylmorpholino)-5-(1,3-dioxolan-2-yl)-7-fluorobenzo[*d*]isoxazol-3-yl)oxy)methyl)pyrrolidin-2-one (**48x**). Prepared following the preparation of **48p** using **47** (300 mg, 0.84 mmol), sodium hydride 60% dispersion in mineral oil (67 mg, 1.68 mmol), and (*R*)-4-(hydroxymethyl)pyrrolidin-2-one<sup>1</sup> (174 mg, 1.51 mmol). Column chromatography on silica gel using DCM:MeOH (90:10 gradient). Pale-yellow oil



(224 mg, 59%). <sup>1</sup>H NMR (300 MHz, DMSO) δ 7.59 (d, *J* = 5.4, 2H), 6.11 (s, 1H), 4.42 (d, *J* = 6.8, 2H), 4.18 – 3.93 (m, 4H), 3.82 – 3.65 (m, 2H), 3.51 – 3.41 (m, 1H), 3.21 – 3.15 (m, 1H), 3.10 – 2.93 (m, 3H), 2.88 – 2.76 (m, 2H), 2.37 (dd, *J* = 16.7, 9.0, 1H), 2.12 (dd, *J* = 16.7, 6.8, 1H), 1.09 (d, *J* = 6.2, 7H). RP-UPLC *t*<sub>R</sub> = 1.020 min (method 2, purity 97%); LC-MS ESI, *m/z* 436.1 [M+H]<sup>+</sup> (anal. calcd. for C<sub>21</sub>H<sub>26</sub>FN<sub>3</sub>O<sub>6</sub>, *m/z* = 435.5).

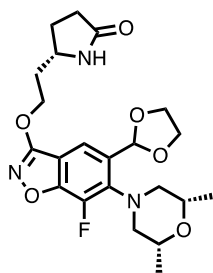

(*S*)-5-(2-((6-((2*R*,6*S*)-2,6-dimethylmorpholino)-5-(1,3-dioxolan-2-yl)-7-

*fluorobenzo[d]isoxazol-3-yl)oxy)ethyl)pyrrolidin-2-one (48y). Prepared following the preparation of 48p using 47 (359 mg, 0.80 mmol), sodium hydride 60% dispersion in mineral oil (67 mg, 1.68 mmol), and (*S*)-5-(2-hydroxyethyl)pyrrolidin-2-one (217 mg, 1.68 mmol). Column chromatography on silica gel using DCM:MeOH (90:10 gradient). White solid (360 mg, 75%). RP-UPLC *t*<sub>R</sub> = 1.064 min (method 2, purity 79%); LC-MS ESI, *m/z* 450.1 [M+H]<sup>+</sup> (anal. calcd. for C<sub>22</sub>H<sub>28</sub>FN<sub>3</sub>O<sub>6</sub>, *m/z* = 449.5).*

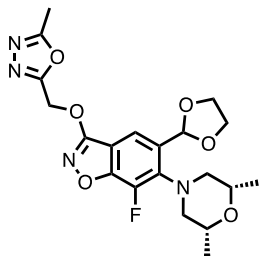

6-((2*R*,6*S*)-2,6-dimethylmorpholino)-5-(1,3-dioxolan-2-yl)-7-fluoro-3-((5-methyl-1,3,4-oxadiazol-2-yl)methoxy)benzo[d]isoxazole (48z). Prepared following the preparation of 48p using 47 (300 mg, 0.841 mmol), sodium hydride 60% dispersion in mineral oil (67 mg, 1.68

mmol), and (5-methyl-1,3,4-oxadiazol-2-yl)methanol (192 mg, 1.68 mmol). Column chromatography on silica gel using hexane:EtOAc (20:80 gradient elution). White solid (77 mg, 21%). <sup>1</sup>H NMR (300 MHz, DMSO-*d*<sub>6</sub>) δ 7.61 (s, 1H), 6.13 (s, 1H), 5.74 (s, 2H), 4.15 – 3.93 (m, 4H), 3.83 – 3.68 (m, 2H), 3.11 – 3.03 (m, 2H), 2.89 – 2.76 (m, 2H), 2.55 (s, 3H), 1.09 (d, *J* = 6.2 Hz, 6H). RP-UPLC *t*<sub>R</sub> = 1.468 min (method 2, purity 100%); LC-MS ESI, *m/z* 435.1 [M+H]<sup>+</sup> (anal. calcd. for C<sub>20</sub>H<sub>23</sub>FN<sub>4</sub>O<sub>6</sub>, *m/z* = 434.4).

### Intermediates from Scheme 3:

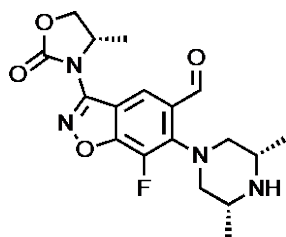

6-((3*S*,5*R*)-3,5-dimethylpiperazin-1-yl)-7-fluoro-3-((*S*)-4-methyl-2-oxooxazolidin-3-yl)benzo[*d*]isoxazole-5-carbaldehyde (**50a**). In a microwave tube, K<sub>2</sub>CO<sub>3</sub> (294 mg, 2.13 mmol) and commercially available (2*R*,6*S*)-2,6-dimethylpiperazine (146 mg, 1.23 mmol) were added to a solution of **49** (300 mg, 1.06 mmol) in acetonitrile (3 mL). The resulting reaction mixture was irradiated in a microwave at 80 °C for 30 min. Then, the reaction mixture was cooled and diluted with water (10 mL) and extracted with EtOAc (3x15 mL). The organic layers were combined, dried over MgSO<sub>4</sub>, filtered, and solvent removed under reduced pressure. The material was purified by flash chromatography on silica gel using CH<sub>2</sub>Cl<sub>2</sub>:MeOH (0-20%) gradient to afford the title compound (270 mg, 65%) as a light yellow solid. <sup>1</sup>H NMR (300 MHz, CDCl<sub>3</sub>) δ 10.27 (s, 1H), 8.61 (d, *J* = 1.1 Hz, 1H), 4.79 – 4.71 (m, 2H), 4.26 – 4.20 (m, 1H), 3.23 – 3.09 (m, 4H), 3.06 – 2.97 (m, 2H), 1.58 (d, *J* = 5.9 Hz, 3H), 1.14 (d, *J* = 6.1 Hz, 6H). RP-UPLC *t*<sub>R</sub> = 3.503 min (method 1, purity 100%); LC-MS ESI, *m/z* 377.2 [M+H]<sup>+</sup> (anal. calcd. for C<sub>18</sub>H<sub>21</sub>FN<sub>4</sub>O<sub>4</sub>, *m/z* = 376.4).

### Scheme S1: Synthesis of amines S2 and S3.<sup>a</sup>

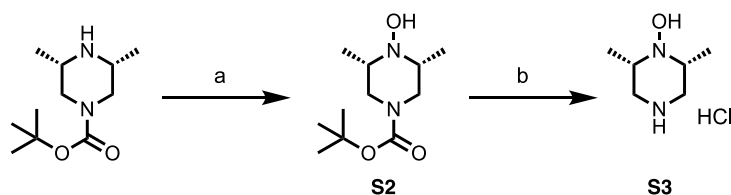

<sup>a</sup>Reagents and conditions: (a) i) SeO<sub>2</sub>, H<sub>2</sub>O<sub>2</sub>, MeOH, 25 °C, 8 h, ii) NaBH<sub>4</sub>, MeOH, 25 °C, 2 h, 37%; (b) 4M HCl, CH<sub>2</sub>Cl<sub>2</sub>, 25 °C, 16 h, 76%.

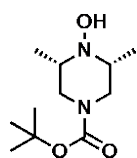

*Tert-butyl (3S,5R)-4-hydroxy-3,5-dimethylpiperazine-1-carboxylate (S2)*. To a stirring solution of commercially available *tert*-butyl (3*S*,5*R*)-3,5-dimethylpiperazine-1-carboxylate (3.00 g, 14.0 mmol) with MeOH (22 mL) in presence of selenium dioxide (780 mg, 0.700 mmol) at 0 °C under N<sub>2</sub> was added dropwise a 30% hydrogen peroxide (1.79 mL, 17.5 mmol) in 15 min. The mixture was then stirred at 25°C for 8 h. Sodium borohydride (222 mg, 5.88 mmol) was added to the above mixture and stirring continued for 2 h. After removal of the solvent, the residual mixture was taken up in sat. K<sub>2</sub>CO<sub>3</sub> solution (10 mL) and extracted with CH<sub>2</sub>Cl<sub>2</sub>/MeOH (9:1) (4x15 mL). The combined organic layers were dried (Na<sub>2</sub>SO<sub>4</sub>), concentrated and the residual liquid was purified by flash chromatography on silica gel using CH<sub>2</sub>Cl<sub>2</sub>:MeOH (0-20%) gradient to afford the title compound (1.20 g, 37%) as an off white solid. <sup>1</sup>H NMR (300 MHz, DMSO-*d*<sub>6</sub>) δ 7.87 (s, 1H), 3.81 (d, *J* = 13.5 Hz, 2H), 2.58 – 2.53 (m, 2H), 2.37 – 2.32 (m, 2H), 1.40 (s, 9H), 1.03 (d, *J* = 6.0 Hz, 6H).

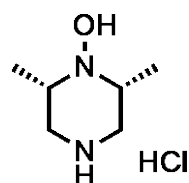

(2*S*,6*R*)-2,6-dimethylpiperazin-1-ol hydrochloride (**S3**). To a solution of **S2** (700 mg, 3.04 mmol) in CH<sub>2</sub>Cl<sub>2</sub> (10 mL) was added 4M HCl in 1,4-dioxane (7.60 mL, 30.4 mmol). The solution was stirred at 25 °C for 16 h. The solvent was removed under reduced pressure and the residue was triturated with diethyl ether to afford the title compound (300 mg, 76%) as a pale-yellow HCl salt. <sup>1</sup>H NMR (300 MHz, DMSO-*d*<sub>6</sub>) δ 9.98 (br m, 2H), 3.93 – 3.85 (m, 1H), 3.57 – 3.48 (m, 2H), 3.30 – 3.25 (m, 1H), 3.19 – 2.98 (m, 2H), 1.31 (d, *J* = 6.3 Hz, 3H), 1.26 (d, *J* = 6.5 Hz, 3H).

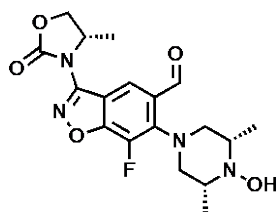

7-fluoro-6-((3*S*,5*R*)-4-hydroxy-3,5-dimethylpiperazin-1-yl)-3-((*S*)-4-methyl-2-oxooxazolidin-3-yl)benzo[*d*]isoxazole-5-carbaldehyde (**50b**). A mixture of **49** (500 mg, 1.77 mmol), **S3** (443 mg, 2.66 mmol) and Et<sub>3</sub>N (1.48 mL, 10.6 mmol) in DMSO (5 mL) was heated at 110 °C for 2 h. Then, the reaction mixture was cooled, diluted with EtOAc (20 mL) and washed with water (3x15 mL). The organic phases were combined, dried over Na<sub>2</sub>SO<sub>4</sub>, filtered and solvent removed under reduced pressure. The material was purified by flash chromatography on silica gel using CH<sub>2</sub>Cl<sub>2</sub>:MeOH (0-20%) gradient to afford the title compound (300 mg, 41%) as a brown solid. <sup>1</sup>H NMR (300 MHz, DMSO-*d*<sub>6</sub>) δ 10.18 (s, 1H), 8.49 (d, *J* = 1.0 Hz, 1H), 7.92 (s, 1H), 4.80 – 4.63 (m, 2H), 4.30 – 4.20 (m, 1H), 3.31 – 3.27 (m, 2H), 3.19 – 3.10 (m, 2H), 2.85 – 2.71 (m, 2H), 1.45 (d, *J* = 5.9 Hz, 3H), 1.07 (d, *J* = 6.0 Hz, 6H). RP-UPLC *t*<sub>R</sub> = 3.698 min (method 1, purity 96%); LC-MS ESI, *m/z* 393.1 [M+H]<sup>+</sup> (anal. calcd. for C<sub>18</sub>H<sub>21</sub>FN<sub>4</sub>O<sub>5</sub>, *m/z* = 392.3).

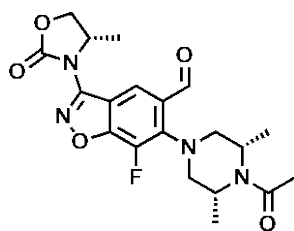

6-((3*S*,5*R*)-4-acetyl-3,5-dimethylpiperazin-1-yl)-7-fluoro-3-((*S*)-4-methyl-2-oxooxazolidin-3-yl)benzo[*d*]isoxazole-5-carbaldehyde (**50c**). Acetic anhydride (115  $\mu$ L, 1.22 mmol) and pyridine (74  $\mu$ L, 917 mmol) was added dropwise to a solution of **50a** (230 mg, 0.611 mmol) in DCM (10 mL) and resulting reaction mixture was stirred at 25  $^{\circ}$ C for 24 h. Reaction mixture was diluted with DCM (15 mL) and washed with 1N HCl to remove excess of pyridine. The organic layer was isolated, dried over Na<sub>2</sub>SO<sub>4</sub>, filtered and solvent removed under reduced pressure. The material was purified by flash chromatography on silica gel using CH<sub>2</sub>Cl<sub>2</sub>:MeOH (0-20%) gradient to afford the title compound (220 mg, 80%) as a yellow solid. RP-UPLC  $t_R$  = 0.784 min (method 2, purity 93%); LC-MS ESI,  $m/z$  419.2 [M+H]<sup>+</sup> (anal. calcd. for C<sub>20</sub>H<sub>23</sub>FN<sub>4</sub>O<sub>5</sub>,  $m/z$  = 418.4).

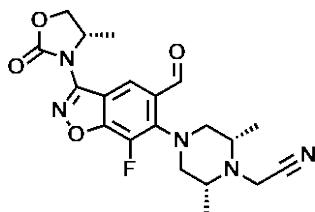

2-((2*S*,6*R*)-4-(7-fluoro-5-formyl-3-((*S*)-4-methyl-2-oxooxazolidin-3-yl)benzo[*d*]isoxazol-6-yl)-2,6-dimethylpiperazin-1-yl)acetonitrile (**50d**). Bromoacetonitrile (125  $\mu$ L, 1.79 mmol) and K<sub>2</sub>CO<sub>3</sub> (330 mg, 2.39 mmol) were added to a solution of **50a** (450 mg, 1.20 mmol) in Acetone (20 ml) and resulting reaction mixture was stirred at 25  $^{\circ}$ C for 16 h. After completion of reaction, solvent was removed under reduced pressure and residue was taken in EtOAc (50 mL) and washed with water (20 mL). Organic phase was dried over Na<sub>2</sub>SO<sub>4</sub>, filtered and solvent removed under reduced pressure. The material was purified by flash chromatography

on silica gel using CH<sub>2</sub>Cl<sub>2</sub>:MeOH (0-5%) gradient to afford the title compound (350 mg, 68%) as a light yellow solid. RP-UPLC  $t_R$  = 1.095 min (method 2, purity 97%); LC-MS ESI,  $m/z$  416.1 [M+H]<sup>+</sup> (anal. calcd. for C<sub>20</sub>H<sub>22</sub>FN<sub>5</sub>O<sub>4</sub>,  $m/z$  = 415.4).

**Scheme S2: Synthesis of amines S4 and S5.<sup>a</sup>**

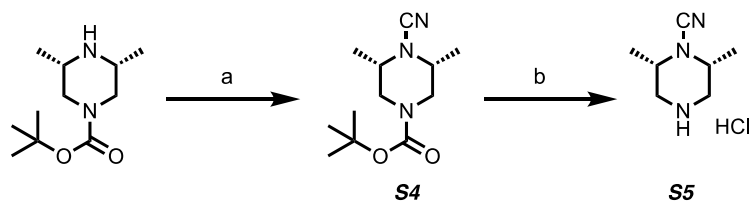

<sup>a</sup>Reagents and conditions: (a) CNBr, K<sub>2</sub>CO<sub>3</sub>, acetone, 25 °C, 16 h, 79%; (b) HCl solution, CH<sub>2</sub>Cl<sub>2</sub>, 25 °C, 16 h, 51%.

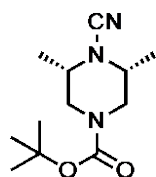

*tert*-butyl (3*S*,5*R*)-4-cyano-3,5-dimethylpiperazine-1-carboxylate (**S4**). To a suspension of commercially available *tert*-butyl (3*S*,5*R*)-3,5-dimethylpiperazine-1-carboxylate (5.90 g, 27.5 mmol) and K<sub>2</sub>CO<sub>3</sub> (5.71 g, 41.3 mmol) in acetone (50 mL), cyanogen bromide (4.37g, 41.3mmol) was syringed and the reaction mixture stirred at 25 °C for 16 h. The following day a white precipitate was observed. Then, the solvent was evaporated to dryness to afford a white solid. The solid was taken up in dichloromethane (50 mL) and washed with water, followed by brine. The organic layer was isolated, dried over MgSO<sub>4</sub>, filtered and solvent removed under reduced pressure. The resulting solid was suspended in hexane (50 mL) and stirred at 25 °C for 2 h. The solid was filtered, washed with hexane, dried *in vacuo* to afford the title compound (5.22 g, 79%) as a white solid. <sup>1</sup>H NMR (300 MHz, DMSO-*d*<sub>6</sub>) δ 3.90 (d,  $J$  = 13.3 Hz, 2H),

3.23 – 3.06 (m, 2H), 2.64 – 2.42 (m, 2H), 1.41 (s, 9H), 1.22 (d,  $J = 6.5$  Hz, 6H). LC-MS ESI,  $m/z$  240.2  $[M+H]^+$  (anal. calcd. for  $C_{12}H_{21}N_3O_2$ ,  $m/z = 239.3$ ).

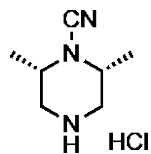

(*2S,6R*)-2,6-dimethylpiperazine-1-carbonitrile hydrochloride (**S5**). To a solution of tert-butyl (*3S,5R*)-4-cyano-3,5-dimethylpiperazine-1-carboxylate (**S4**) (5.22g, 21.8 mmol) in dichloromethane (5 mL), Hydrogen chloride solution (9.85 mL, 283 mmol) in dioxane was syringed. The reaction mixture was stirred at 25 °C for 16 h. The following day a white precipitate was observed, filtered, washed with cold DCM and dried *in vacuo* to afford the title compound (1.98 g, 52% yield) as a white HCl salt. *Note: The product is hygroscopic.*  $^1H$  NMR (300 MHz, DMSO- $d_6$ )  $\delta$  10.24 – 9.81 (m, 2H), 3.74 – 3.49 (m, 2H), 3.33 – 3.13 (m, 2H), 2.75 – 2.54 (m, 2H), 1.23 (d,  $J = 6.6$  Hz, 6H). LC-MS ESI,  $m/z$  140.2  $[M+H]^+$  (anal. calcd. for  $C_7H_{13}N_3$ ,  $m/z = 139.2$ ).

#### Intermediates from Scheme 4

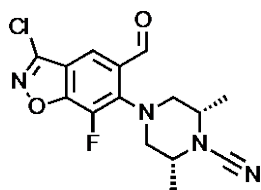

(*2R,6S*)-4-(3-chloro-7-fluoro-5-formylbenzo[*d*]isoxazol-6-yl)-2,6-dimethylpiperazine-1-carbonitrile (**52a**). To a pressure tube containing a solution of **51** (3.80 g, 17.5 mmol) in acetonitrile (20 mL),  $K_2CO_3$  (9.66 g, 69.9 mmol) and **S5** (4.60 g, 26.2 mmol) were added. The resulting reaction mixture was heated at 110 °C for 5 h. Then, the reaction mixture was cooled and diluted with water (10 mL) and extracted with EtOAc (3x15 mL). The organic layers were combined, dried over  $MgSO_4$ , filtered, and solvent removed under reduced pressure. The

material was purified by flash chromatography on silica gel using hexane:EtOAc (0-95%) gradient to afford the title compound (4.78 g, 81%) as an off-white solid. RP-UPLC  $t_R$  = 2.856 min (method 1, purity 99%); LC-MS ESI,  $m/z$  312.8  $[M-CN]^+$  (anal. calcd. for  $C_{14}H_{15}ClFN_3O_2$ ,  $m/z$  = 311.7).

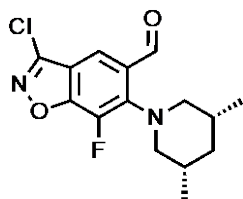

*3-chloro-6-((3R,5S)-3,5-dimethylpiperidin-1-yl)-7-fluorobenzo[d]isoxazole-5-carbaldehyde (52b)*. A suspension of **51** (1.00 g, 4.60 mmol),  $K_2CO_3$  (1.27 g, 9.19 mmol) and commercially available (3*R*,5*S*)-3,5-dimethylpiperidine (520 mg, 4.60 mmol) in acetonitrile (60mL) was heated to 90 °C for 1 h. The mixture was cooled, solvent removed, diluted with EtOAc (50 mL) and washed with brine (50 mL). The organic layer was isolated, dried over  $MgSO_4$ , filtered, solvent removed under reduced pressure. The material was purified by flash chromatography on silica gel using hexane:EtOAc (0-10%) gradient to afford the title compound (1.12 g, 77%) as a yellow solid.  $^1H$  NMR (300 MHz,  $CDCl_3$ )  $\delta$  10.24 (s, 1H), 7.93 (d,  $J$ = 1.0, 1H), 3.23 (ddd,  $J$ = 11.8, 4.0, 1.9, 2H), 2.87 (dd,  $J$ = 11.9, 3.3, 2H), 2.01 – 1.79 (m, 2H), 1.16 – 0.68 (m, 8H). RP-UPLC  $t_R$  = 1.404 min (method 2, purity 98%); LC-MS ESI,  $m/z$  311.0  $[M+H]^+$  (anal. calcd. for  $C_{15}H_{16}ClFN_2O_2$ ,  $m/z$  = 310.8).

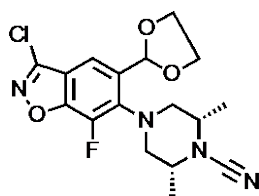

*(2R,6S)-4-(3-chloro-5-(1,3-dioxolan-2-yl)-7-fluorobenzo[d]isoxazol-6-yl)-2,6-dimethylpiperazine-1-carbonitrile (53a)*. A mixture of **52a** (451 mg, 1.34 mmol), ethane-1,2-



diol (299  $\mu\text{L}$ , 5.36 mmol) and *p*-TSA (13 mg, 0.067 mmol) in toluene (50 mL) was heated to 130  $^{\circ}\text{C}$  for 16 h with azeotropic removal of water, using a Dean-Stark Trap. The mixture was cooled, solvent removed, diluted with EtOAc (10 mL) and washed with  $\text{NaHCO}_3$  (10 mL) and water (10 mL). The organic layer was isolated, dried over  $\text{Na}_2\text{SO}_4$ , filtered, solvent removed under reduced pressure. The material was purified by flash chromatography on silica gel using hexane:EtOAc (0-40%) gradient to afford the title compound (328 mg, 57%) as a pale yellow solid. RP-UPLC  $t_{\text{R}} = 3.751$  min (method 1, purity 89%); LC-MS ESI,  $m/z$  381.1  $[\text{M}+\text{H}]^+$  (anal. calcd. for  $\text{C}_{17}\text{H}_{18}\text{ClFN}_4\text{O}_3$ ,  $m/z = 380.8$ ).

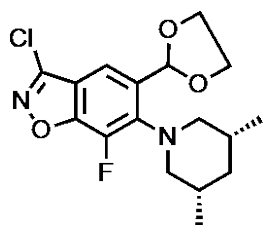

*3-chloro-6-((3R,5S)-3,5-dimethylpiperidin-1-yl)-5-(1,3-dioxolan-2-yl)-7-*

*fluorobenzo[d]isoxazole (53b)*. Prepared as described for **53a** with **52b** (1.12 g, 3.60 mmol), ethane-1,2-diol (1.21 mL, 21.6 mmol) and *p*-TSA (48 mg, 0.250 mmol). Flash column chromatography using hexane:EtOAc (90:10), afforded the title compound (1.16 g, 87%) as a yellow oil.  $^1\text{H}$  NMR (300 MHz,  $\text{CDCl}_3$ )  $\delta$  7.70 (d,  $J = 1.0$ , 1H), 6.17 (s, 1H), 4.30 – 4.15 (m, 2H), 4.15 – 4.01 (m, 2H), 3.21 – 3.12 (m, 2H), 2.74 (td,  $J = 11.0$ , 3.4, 2H), 1.84 (ddt,  $J = 10.7$ , 3.5, 1.9, 2H), 0.99 – 0.69 (m, 8H). RP-UPLC  $t_{\text{R}} = 1.460$  min (method 2, purity 96%); LC-MS ESI,  $m/z$  355.0  $[\text{M}]^+$  (anal. calcd. for  $\text{C}_{17}\text{H}_{20}\text{FN}_2\text{O}_3$ ,  $m/z = 354.8$ ).

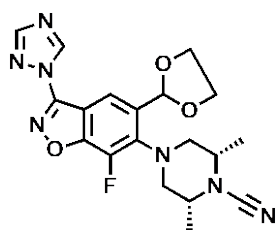

(2*S*,6*R*)-4-(5-(1,3-dioxolan-2-yl)-7-fluoro-3-(1*H*-1,2,4-triazol-1-yl)benzo[*d*]isoxazol-6-yl)-2,6-dimethylpiperazine-1-carbonitrile (**54a**). In a sealed tube, a mixture of **53a** (300 mg, 0.788 mmol), 1*H*-1,2,4-triazole (54 mg, 0.788 mmol) and sodium hydride (38 mg, 1.58 mmol) in DMF (2 mL) were heated to 90 °C for 2h. A dark brown solution was obtained and cooled to RT. Solvent was removed to afford a brown residue. The residue was adsorbed onto flash silica and purified by flash chromatography using DCM:MeOH (95:5). The last fraction was isolated, solvent removed to afford the title compound (192 mg, 55 %) as an off-white solid. RP-UPLC  $t_R$  = 1.051 min (method 2, purity 93%); LC-MS ESI,  $m/z$  414.2 [M+H]<sup>+</sup> (anal. calcd. for C<sub>19</sub>H<sub>20</sub>FN<sub>7</sub>O<sub>3</sub>,  $m/z$  = 413.2).

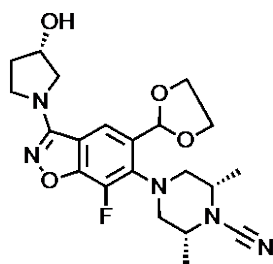

(2*R*,6*S*)-4-(5-(1,3-dioxolan-2-yl)-7-fluoro-3-((*S*)-3-hydroxypyrrolidin-1-yl)benzo[*d*]isoxazol-6-yl)-2,6-dimethylpiperazine-1-carbonitrile (**54b**). In a sealed tube, a mixture of **53a** (301 mg, 0.789 mmol), commercially available (*S*)-pyrrolidin-3-ol (138 mg, 1.58 mmol) and DBU (238  $\mu$ L, 1.58 mmol) in acetonitrile (2 mL) were heated to 110 °C for 16 h. The mixture was cooled, solvent removed, diluted with EtOAc (10 mL) and washed with water (10 mL). The organic layer was isolated, dried over Na<sub>2</sub>SO<sub>4</sub>, filtered, solvent removed under reduced pressure. The material was purified by flash chromatography on silica gel using hexane:EtOAc (5:95) gradient to afford the title compound (262 mg, 77%) as an off-white solid. RP-UPLC  $t_R$  = 3.06 min (method 2, purity 100%); LC-MS ESI,  $m/z$  432.2 [M]<sup>+</sup> (anal. calcd. for C<sub>21</sub>H<sub>26</sub>FN<sub>5</sub>O<sub>4</sub>,  $m/z$  = 431.5).

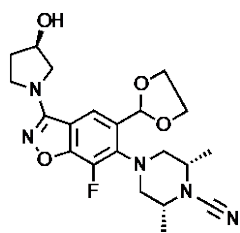

(2*R*,6*S*)-4-(5-(1,3-dioxolan-2-yl)-7-fluoro-3-((*R*)-3-hydroxypyrrolidin-1-yl)benzo[*d*]isoxazol-6-yl)-2,6-dimethylpiperazine-1-carbonitrile (**54c**). Prepared as described for **54b** with **53a** (302 mg, 0.792 mmol), commercially available (*R*)-pyrrolidin-3-ol (138 mg, 1.58 mmol) and DBU (241 mg, 1.58 mmol). Flash column chromatography using hexane:EtOAc (20:80), afforded the title compound (237 mg, 69%) as an off-white solid. RP-UPLC  $t_R$  = 3.06 min (method 1, purity 100%); LC-MS ESI,  $m/z$  432.2 [M+H]<sup>+</sup> (anal. calcd. for C<sub>21</sub>H<sub>26</sub>FN<sub>5</sub>O<sub>4</sub>,  $m/z$  = 431.5).

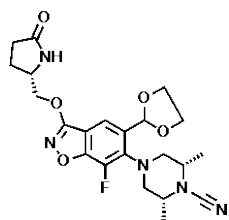

(2*R*,6*S*)-4-(5-(1,3-dioxolan-2-yl)-7-fluoro-3-(((*S*)-5-oxopyrrolidin-2-yl)methoxy)benzo[*d*]isoxazol-6-yl)-2,6-dimethylpiperazine-1-carbonitrile (**54d**). In a sealed tube, a mixture of (*S*)-5-(hydroxymethyl)pyrrolidin-2-one (272 mg, 2.36 mmol) and sodium hydride 60% dispersion in mineral oil (94 mg, 2.36 mmol) in DMF (4 mL) were heated to 30 °C for 30 min. This was followed but the addition of **53a** (300 mg, 0.788 mmol) and the reaction mixture was stirred at 30 °C for 16 h. The mixture was cooled, solvent removed and the material was purified by flash chromatography on silica gel using DCM:MeOH (90:10) gradient to afford the title compound (312 mg, 85%) as a colourless oil. RP-UPLC  $t_R$  = 1.016 min (method 2, purity 99%); LC-MS ESI,  $m/z$  460.1 [M+H]<sup>+</sup> (anal. calcd. for C<sub>22</sub>H<sub>26</sub>FN<sub>5</sub>O<sub>5</sub>,  $m/z$  = 459.5).

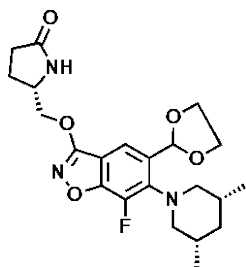

(*S*)-5-(((6-((3*R*,5*S*)-3,5-dimethylpiperidin-1-yl)-5-(1,3-dioxolan-2-yl)-7-fluorobenzo[*d*]isoxazol-3-yl)oxy)methyl)pyrrolidin-2-one (**54e**). Prepared as described for **54b** with **53b** (300 mg, 0.846 mmol), (*S*)-5-(hydroxymethyl)pyrrolidin-2-one (195 mg, 1.69 mmol) and sodium hydride 60% dispersion in mineral oil (68 mg, 1.69 mmol). Flash column chromatography using hexane:EtOAc (20:80), afforded the title compound (358 mg, 91%) as a pale-yellow oil. RP-UPLC  $t_R = 1.256$  min (method 2, purity 93%); LC-MS ESI,  $m/z$  434.1  $[M+H]^+$  (anal. calcd. for  $C_{22}H_{28}FN_3O_5$ ,  $m/z = 433.5$ ).

**Scheme S3:** Synthesis of amine **S11**.<sup>a</sup>

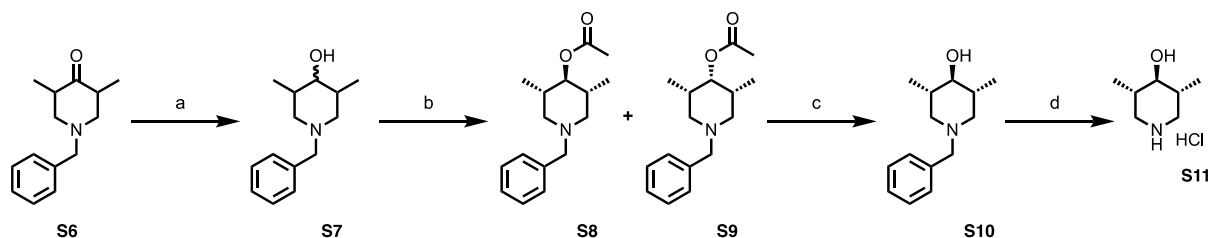

<sup>a</sup>Reagents and conditions: (a)  $NaBH_4$ , MeOH, 0-20 °C, 0.5h, 99%; (b)  $Ac_2O$ , DMAP, Pyr, 110°C, 2h, 19-28%; (c) NaOH, EtOH, 100°C, 24h, 99%; (d)  $Pd(OH)_2/C$ , conc. HCl, MeOH, 27 °C, 3h, 82%.

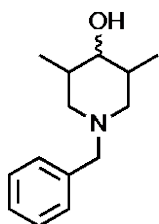

*1-benzyl-3,5-dimethylpiperidin-4-ol (S7)*. To a mixture of commercially available *rel*-(3*R*,5*S*)-1-benzyl-3,5-dimethylpiperidin-4-one (1.17 g, 5.38 mmol) (**S6**) in methanol (25 mL), sodium borohydride (285 mg, 7.54 mmol) was added at 0 °C, and stirred at 20 °C for 30 min. The reaction mixture was quenched with sat. NaHCO<sub>3</sub> solution and extracted with EtOAc (3x50 mL), dried over sodium sulfate, filtered and solvent removed to afford the title compound as a mixture of diastereomers. White solid (1.10 g, 99%). <sup>1</sup>H NMR (300 MHz, CDCl<sub>3</sub>) δ 7.39 – 7.23 (m, 10H), 3.59 (s, 1H), 3.54 (s, 2H), 3.49 (s, 2H), 2.89 – 2.78 (m, 2H), 2.71 (t, *J* = 8.9 Hz, 1H), 2.57 – 2.52 (m, 2H), 2.05 – 1.92 (m, 4H), 1.79 – 1.64 (m, 4H), 0.99 – 0.94 (m, 12H). LC-MS ESI, *m/z* 220.3 [M+H]<sup>+</sup> (anal. calcd. for C<sub>14</sub>H<sub>21</sub>NO, *m/z* = 219.3). *Note: NMR shows presence of both diastereomers.*

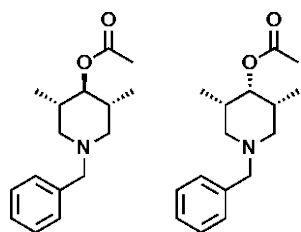

To a pressure tube containing a solution of **S7** and 4-(dimethylamino)pyridine (9.36 mg, 0.0766 mmol) in pyridine (7 mL), acetic anhydride (1.09 mL, 11.5 mmol) was added and the reaction mixture heated to 110 °C for 2 h. The reaction mixture was cooled and excess pyridine evaporated. The residue was diluted with water and extracted with chloroform (2x60 mL). The organic phases were isolated, combined, dried over sodium sulfate, filtered and solvent removed under reduced pressure to afford a mixture of diastereomers. The isomers were separated by flash chromatography using hexane:EtOAc (0-10%) gradient to afford two diastereomers. *Trans*-(3*S*,4*r*,5*R*)-1-benzyl-3,5-dimethylpiperidin-4-yl acetate (**S9**). Colourless oil (687 mg, 28%). <sup>1</sup>H NMR (300 MHz, CDCl<sub>3</sub>) δ 7.39 – 7.23 (m, 5H), 4.33 (t, *J* = 9.7 Hz, 1H), 3.50 (s, 2H), 2.90 – 2.84 (m, 2H), 2.11 (s, 3H), 1.95 – 1.73 (m, 4H), 0.83 (d, *J* = 6.1 Hz, 6H).

RP-UPLC  $t_R$  = 0.241 min (method 2, purity 82%); LC-MS ESI,  $m/z$  262.3  $[M+H]^+$  (anal. calcd. for  $C_{16}H_{23}NO_2$ ,  $m/z$  = 261.4).

*Cis*-(3*S*,4*S*,5*R*)-1-benzyl-3,5-dimethylpiperidin-4-yl acetate (**S8**). White solid (514 mg, 19%).  $^1H$  NMR (300 MHz,  $CDCl_3$ )  $\delta$  7.38 – 7.24 (m, 5H), 5.09 (s, 1H), 3.53 (s, 2H), 2.57 (d,  $J$  = 7.8 Hz, 2H), 2.12 (s, 3H), 2.08 – 1.87 (m, 4H), 0.82 (d,  $J$  = 6.4 Hz, 6H). RP-UPLC  $t_R$  = 0.206 min (method 2, purity 74%); LC-MS ESI,  $m/z$  262.3  $[M+H]^+$  (anal. calcd. for  $C_{16}H_{23}NO_2$ ,  $m/z$  = 261.4).

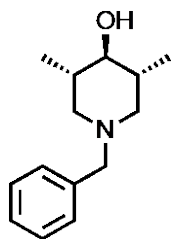

(3*S*,4*r*,5*R*)-1-benzyl-3,5-dimethylpiperidin-4-ol (**S10**). To a solution **S9** (680 mg, 2.60 mmol) in ethanol (0.700 mL) was added 5N sodium hydroxide (3.67 mL, 18.4 mmol) in a pressure vial. This reaction mixture was heated to 100 °C for 24 h. The reaction mixture was cooled, diluted with water and extracted with EtOAc (2x50 mL). The organic phases were isolated, dried over sodium sulfate, filtered and solvent removed to afford the title compound (570 mg, 99%) as a yellow solid.  $^1H$  NMR (300 MHz, MeOD)  $\delta$  7.37 – 7.24 (m, 5H), 3.50 (s, 2H), 2.89 – 2.80 (m, 2H), 2.59 (t,  $J$  = 9.3 Hz, 1H), 1.79 – 1.57 (m, 4H), 0.96 (d,  $J$  = 6.2 Hz, 6H). LC-MS ESI,  $m/z$  220.2  $[M+H]^+$  (anal. calcd. for  $C_{14}H_{21}NO$ ,  $m/z$  = 219.3).

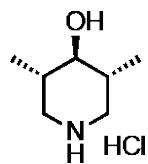

(3*S*,4*r*,5*R*)-3,5-dimethylpiperidin-4-ol hydrochloride (**S11**). To a solution of **S10** (565 mg, 2.58 mmol) in methanol (12 mL) was added palladium hydroxide on carbon (72 mg, 0.520 mmol),

followed by 6 drops of conc. HCl and stirred for 3 h at 27 °C under a hydrogen atmosphere. The reaction mixture was filtered through a pad of Celite, washed with MeOH and solvent evaporated under reduced pressure. EtOH was added and evaporated once again to afford the title compound (350 mg, 82%) as a white solid.  $^1\text{H}$  NMR (300 MHz, MeOD)  $\delta$  3.14 (dd,  $J = 12.6, 2.9$  Hz, 2H), 2.81 (t,  $J = 9.9$  Hz, 1H), 2.49 (t,  $J = 12.4$  Hz, 2H), 1.72 – 1.53 (m, 2H), 1.04 (d,  $J = 6.5$  Hz, 6H). LC-MS ESI,  $m/z$  130.2  $[\text{M}+\text{H}]^+$  (anal. calcd. for  $\text{C}_7\text{H}_{15}\text{NO}$ ,  $m/z = 129.2$ ).

**Figure S2:**  $^1\text{H}$  NMR spectrum of S11.

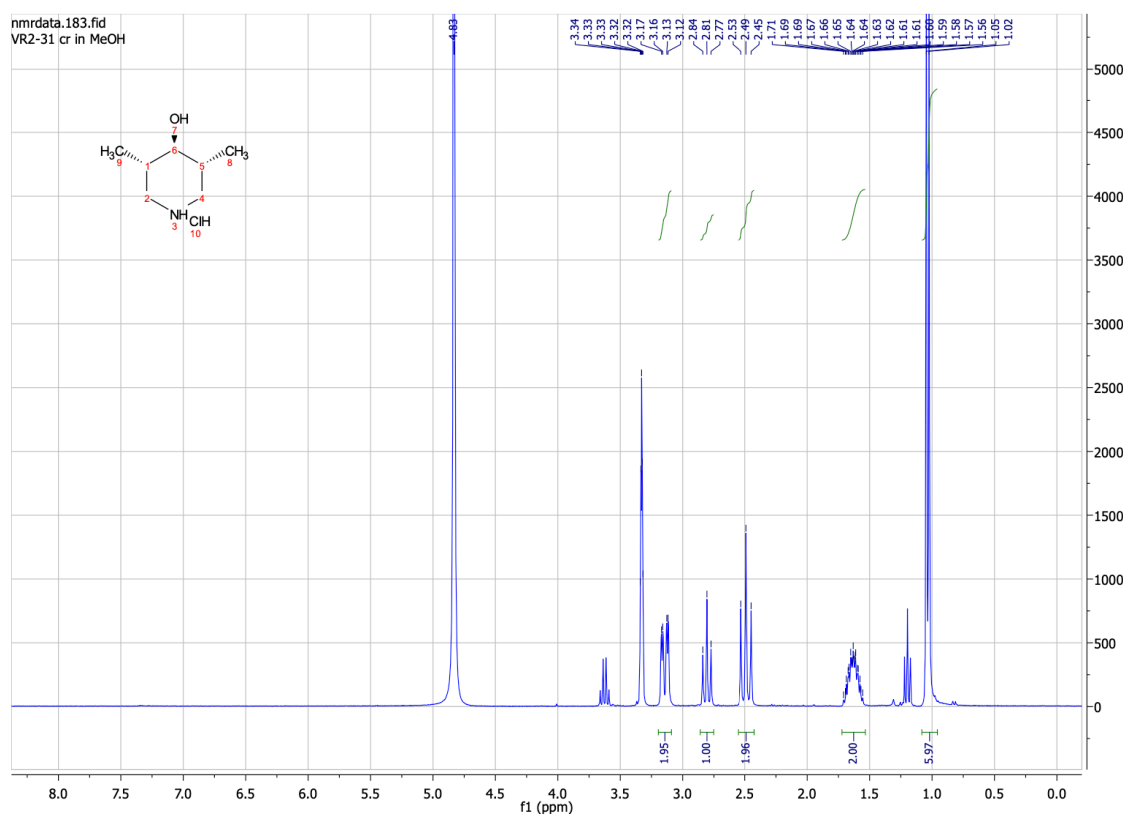

### Intermediates from Scheme 5

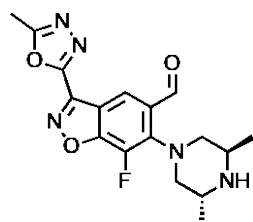

6-((3*R*,5*R*)-3,5-dimethylpiperazin-1-yl)-7-fluoro-3-(5-methyl-1,3,4-oxadiazol-2-yl)benzo[*d*]isoxazole-5-carbaldehyde (**56**). In a sealed tube, a mixture of 6,7-difluoro-3-(5-methyl-1,3,4-oxadiazol-2-yl)-1,2-benzoxazole-5-carbaldehyde (500 mg, 1.89 mmol),<sup>2</sup> commercially available (2*R*,6*R*)-2,6-dimethylpiperazine dichloride (388 mg, 2.07 mmol) and K<sub>2</sub>CO<sub>3</sub> (781 mg, 5.66 mmol) in a mixture of acetonitrile (20 mL):water (1 mL), was heated to 90 °C for 13 h. Then, the reaction mixture was cooled and solvent was removed under reduced pressure. The residue was taken up in EtOAc (50 mL) and washed with water (2x50 mL). The aqueous layers were combined and extracted with fresh EtOAc (50 mL), which was then washed with water and brine. The organic layers were combined, dried over MgSO<sub>4</sub>, filtered, and solvent removed under reduced pressure. The material was purified by flash chromatography on silica gel using hexane:CH<sub>2</sub>Cl<sub>2</sub> (0-10%) gradient to afford the title compound (623 mg, 92%) as a yellow solid. <sup>1</sup>H NMR (300 MHz, DMSO-*d*<sub>6</sub>) δ 10.32 (s, 1H), 8.32 (s, 1H), 3.02 – 2.92 (m, 2H), 2.72 (s, 3H), 1.12 (d, *J* = 6.4 Hz, 6H). (Note: 4 aliphatic protons masked by water peak at 3.3ppm and NH peak not observed). RP-UPLC *t*<sub>R</sub> = 0.639 min (method 2, purity 100%); LC-MS ESI, *m/z* 360.1 [M+H]<sup>+</sup> (anal. calcd. for C<sub>17</sub>H<sub>18</sub>FN<sub>5</sub>O<sub>3</sub>, *m/z* = 359.4).

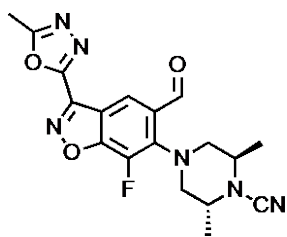

(2*R*,6*R*)-4-(7-fluoro-5-formyl-3-(5-methyl-1,3,4-oxadiazol-2-yl)benzo[*d*]isoxazol-6-yl)-2,6-dimethylpiperazine-1-carbonitrile (**57**). Cyanic bromide (273 mg, 2.58 mmol) and K<sub>2</sub>CO<sub>3</sub> (357 mg, 2.58 mmol) were added to a solution of **56** (618 mg, 1.72 mmol) in acetone (10 mL) and resulting reaction mixture was stirred at 27 °C for 9 h. Then the solvent was removed under reduced pressure and residue was taken up in DCM (20 mL) and washed with water (2x10



mL). The aqueous phases were combined and re-extracted with fresh DCM (20 mL). The organic phases were combined, dried over Na<sub>2</sub>SO<sub>4</sub>, filtered and solvent removed under reduced pressure. The material was purified by flash chromatography on silica gel using hexane:EtOAc (0-90%) gradient to afford the title compound as a white solid (506 mg, 77%). <sup>1</sup>H NMR (300 MHz, DMSO-*d*<sub>6</sub>) δ 10.37 (s, 1H), 8.40 (s, 1H), 3.87 – 3.75 (m, 2H), 3.53 (d, *J* = 12.5 Hz, 2H), 3.21 – 3.08 (m, 2H), 2.72 (s, 3H), 1.32 (d, *J* = 6.6 Hz, 6H). RP-UPLC *t*<sub>R</sub> = 1.041 min (method 2, purity 100%); LC-MS ESI, *m/z* 385.1 [M+H]<sup>+</sup> (anal. calcd. for C<sub>18</sub>H<sub>17</sub>FN<sub>6</sub>O<sub>3</sub>, *m/z* = 384.4).

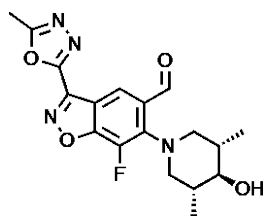

*7-fluoro-6-((3S,4r,5R)-4-hydroxy-3,5-dimethylpiperidin-1-yl)-3-(5-methyl-1,3,4-oxadiazol-2-yl)benzo[d]isoxazole-5-carbaldehyde (58)*. In a sealed tube, a mixture of 6,7-difluoro-3-(5-methyl-1,3,4-oxadiazol-2-yl)-1,2-benzoxazole-5-carbaldehyde (300 mg, 1.13 mmol),<sup>2</sup> **S13** (225 mg, 1.36 mmol) and K<sub>2</sub>CO<sub>3</sub> (391 mg, 2.83 mmol) in a mixture of acetonitrile (12 mL):water (1.2 mL), was heated to 90 °C for 1 h. Then, the reaction mixture was cooled and solvent was removed under reduced pressure. The residue was taken up in EtOAc (50 mL) and washed with water (2x50 mL). The organic layers were combined, dried over MgSO<sub>4</sub>, filtered, and solvent removed under reduced pressure, to afford the title compound (381 mg, 89%) as a pure yellow solid. <sup>1</sup>H NMR (300 MHz, CDCl<sub>3</sub>) δ 10.33 (s, 1H), 8.58 (d, *J* = 1.0 Hz, 1H), 3.36 – 3.26 (m, 2H), 3.20 – 3.11 (m, 2H), 2.99 (t, *J* = 9.7 Hz, 1H), 2.76 (s, 3H), 1.99 – 1.84 (m, 2H), 1.09 (d, *J* = 6.5 Hz, 6H). <sup>19</sup>F NMR (377 MHz, CDCl<sub>3</sub>) δ -144.37. <sup>13</sup>C NMR (101 MHz, CDCl<sub>3</sub>) δ 189.38, 165.34, 156.28, 155.41 (d, *J* = 12.4 Hz), , 146.21, 142.59 (d, *J* = 5.8 Hz), 142.41 (d, *J* = 256 Hz), 131.74, 120.71, 117.15, 80.19, 59.60 (d, *J* = 4.7 Hz), 39.33, 15.07, 11.06. RP-

UPLC  $t_R$  = 1.050 min (method 2, purity 99%); LC-MS ESI,  $m/z$  374.4  $[M+H]^+$  (anal. calcd. for  $C_{18}H_{19}FN_4O_4$ ,  $m/z$  = 375.1).

#### 4. Characterization of inactive isomers with unwanted configuration (2*S*,4*R*,4*aR*) and positive optical rotation:

(2*S*,4*R*,4*aR*)-11-fluoro-8-((*S*)-3-hydroxypyrrolidin-1-yl)-2,4-dimethyl-1,2,4,4*a*-tetrahydro-2'*H*,6*H*-spiro[isoxazolo[4,5-*g*][1,4]oxazino[4,3-*a*]quinoline-5,5'-pyrimidine]-2',4',6'-(1'*H*,3'*H*)-trione (**8E**). White solid (120 mg, 21%).  $^1H$  NMR (300 MHz, MeOD)  $\delta$  7.22 (s, 1H), 4.60 – 4.50 (m, 1H), 4.24 – 4.14 (m, 1H), 4.10 - 4.00 (m, 1H), 3.98 – 3.63 (m, 4H), 3.58 – 3.45 (m, 1H), 3.40 – 3.30 (m, 2H), 3.20 – 3.04 (m, 2H), 2.24 – 1.98 (m, 2H), 1.22 (d,  $J$  = 6.2 Hz, 3H), 1.01 (d,  $J$  = 6.3 Hz, 3H).  $^{13}C$  NMR (101 MHz, MeOD)  $\delta$  172.73, 169.43, 159.95, 154.71 (d,  $J$  = 12.9 Hz), 151.12, 136.33 (d,  $J$  = 240.0 Hz), 136.12, 122.23, 117.27, 110.08, 74.29, 73.85, 71.73, 66.51, 58.12 (d,  $J$  = 9.8 Hz), 57.80, 55.50, 47.86, 41.21, 35.00, 18.98, 18.66. RP-HPLC  $t_R$  = 2.963 min (method 1, purity 99%); LC-MS APCI,  $m/z$  472.1  $[M-H]^-$  (anal. calcd. for  $C_{22}H_{24}FN_5O_6$ ,  $m/z$  = 473.5).  $[\alpha]_D^{20}$  = +158.3° (c 0.27, MeOH).

(2*S*,4*R*,4*aR*)-11-fluoro-8-((*R*)-3-hydroxypyrrolidin-1-yl)-2,4-dimethyl-1,2,4,4*a*-tetrahydro-2'*H*,6*H*-spiro[isoxazolo[4,5-*g*][1,4]oxazino[4,3-*a*]quinoline-5,5'-pyrimidine]-2',4',6'-(1'*H*,3'*H*)-trione (**9E**). White solid (50 mg, 19%).  $^1H$  NMR (300 MHz, MeOD)  $\delta$  7.21 (s, 1H), 4.63 – 4.50 (m, 1H), 4.23 – 4.15 (m, 1H), 4.09 – 4.02 (m, 1H), 3.98 – 3.84 (m, 1H), 3.85 – 3.77 (m, 1H), 3.77 – 3.61 (m, 4H), 3.57 – 3.44 (m, 1H), 3.20 – 3.06 (m, 2H), 2.24 – 1.99 (m, 2H), 1.22 (d,  $J$  = 6.2 Hz, 3H), 1.01 (d,  $J$  = 6.3 Hz, 3H).  $^{13}C$  NMR (101 MHz, MeOD)  $\delta$  171.18, 167.84, 158.43, 153.16 (d,  $J$  = 13.2 Hz), 149.57, 134.82 (d,  $J$  = 239.7 Hz), 134.60, 120.68, 115.66, 108.56, 72.68, 72.25, 70.14, 64.90, 56.53 (d,  $J$  = 9.5 Hz), 56.31, 53.88, 46.23,

39.61, 33.42, 17.36, 17.03. RP-HPLC  $t_R$  = 2.920 min (method 1, purity 99%); LC-MS APCI,  $m/z$  472.1 [M-H]<sup>-</sup> (anal. calcd. for C<sub>22</sub>H<sub>24</sub>FN<sub>5</sub>O<sub>6</sub>,  $m/z$  = 473.5).  $[\alpha]_D^{20}$  = +142.2° (c 0.27, MeOH).

*(2S,4R,4aR)-8-((3R,4R)-3,4-dihydroxypyrrolidin-1-yl)-11-fluoro-2,4-dimethyl-1,2,4,4a-tetrahydro-2'H,6H-spiro[isoxazolo[4,5-g][1,4]oxazino[4,3-a]quinoline-5,5'-pyrimidine]-2',4',6'(1'H,3'H)-trione (10E)*. White solid (99mg, 18%). <sup>1</sup>H NMR (300 MHz, MeOD) δ 7.10 (s, 1H), 4.15 – 4.04 (m, 3H), 3.97 – 3.92 (m, 1H), 3.84 – 3.63 (m, 4H), 3.57 – 3.48 (m, 1H), 3.47 – 3.41 (m, 2H), 3.07 – 2.94 (m, 2H), 1.11 (d,  $J$  = 6.2 Hz, 3H), 0.90 (d,  $J$  = 6.3 Hz, 3H). <sup>13</sup>C NMR (101 MHz, MeOD) δ 172.73, 169.42, 160.12, 154.77 (d,  $J$  = 12.0 Hz), 151.13, 136.36 (d,  $J$  = 239.9 Hz), 136.17, 122.37, 117.19, 110.05, 76.60 (2C), 74.28, 73.84, 66.52, 58.55, 58.11 (d,  $J$  = 9.8 Hz), 55.55 (2C), 41.22, 18.98, 18.65. RP-HPLC  $t_R$  = 2.829 min (method 1, purity 99%); LC-MS APCI,  $m/z$  488.1 [M-H]<sup>-</sup> (anal. calcd. for C<sub>22</sub>H<sub>24</sub>FN<sub>5</sub>O<sub>7</sub>,  $m/z$  = 489.5).  $[\alpha]_D^{20}$  = +160.8° (c 0.27, MeOH).

*(2S,4R,4aR)-8-((3S,4S)-3,4-dihydroxypyrrolidin-1-yl)-11-fluoro-2,4-dimethyl-1,2,4,4a-tetrahydro-2'H,6H-spiro[isoxazolo[4,5-g][1,4]oxazino[4,3-a]quinoline-5,5'-pyrimidine]-2',4',6'(1'H,3'H)-trione (11E)*. Off-white solid (10 mg, 6%). <sup>1</sup>H NMR (300 MHz, MeOD) δ 7.24 (s, 1H), 4.23 (dd,  $J$  = 5.9, 2.9 Hz, 3H), 4.06 (d,  $J$  = 8.9 Hz, 1H), 4.00 – 3.79 (m, 4H), 3.53 (d,  $J$  = 10.8 Hz, 2H), 3.17 – 3.06 (m, 2H), 1.22 (d,  $J$  = 6.2 Hz, 3H), 1.01 (d,  $J$  = 6.3 Hz, 3H). <sup>13</sup>C NMR (151 MHz, MeOD) δ 171.17, 167.84, 158.54, 153.19, 149.57, 135.61, 134.66, 134.02, 120.72, 115.64, 108.48, 74.94, 72.70, 72.29, 64.86, 56.54, 54.46, 53.97, 53.87, 39.58, 17.36, 17.04. RP-HPLC  $t_R$  = 2.835 min (method 1, purity 99%); LC-MS APCI,  $m/z$  488.1 [M-H]<sup>-</sup> (anal. calcd. for C<sub>22</sub>H<sub>24</sub>FN<sub>5</sub>O<sub>7</sub>,  $m/z$  = 489.5).  $[\alpha]_D^{20}$  = +117.8° (c 0.23, MeOH).

(2*S*,4*R*,4*aR*)-8-((3*R*,4*S*)-3,4-dihydroxypyrrolidin-1-yl)-11-fluoro-2,4-dimethyl-1,2,4,4*a*-tetrahydro-2'*H*,6*H*-spiro[isoxazolo[4,5-*g*][1,4]oxazino[4,3-*a*]quinoline-5,5'-pyrimidine]-2',4',6'(1'*H*,3'*H*)-trione (**12E**). White solid (52mg, 8%). <sup>1</sup>H NMR (300 MHz, MeOD) δ 7.18 (s, 1H), 4.38 – 4.25 (m, 2H), 4.24 – 4.09 (m, 1H), 4.09 – 4.00 (m, 1H), 3.98 – 3.85 (m, 1H), 3.83 – 3.73 (m, 2H), 3.60 – 3.47 (m, 2H), 3.41 – 3.34 (m, 1H), 3.19 – 3.04 (m, 2H), 1.87 – 1.63 (m, 1H), 1.22 (d, *J* = 6.2 Hz, 3H), 1.01 (d, *J* = 6.3 Hz, 3H). <sup>13</sup>C NMR (151 MHz, MeOD) δ 171.14, 167.84, 158.32, 153.13 (d, *J* = 12.6 Hz), 149.54, 134.73 (d, *J* = 239.9 Hz), 134.60, 120.76, 115.57, 108.26, 72.67, 72.24, 70.83, 64.88, 56.51 (d, *J* = 9.7 Hz), 56.54, 53.83, 52.77, 52.49, 39.53, 17.36, 17.04. RP-HPLC *t*<sub>R</sub> = 2.849 min (method 1, purity 99%); LC-MS APCI, *m/z* 488.1 [M-H]<sup>-</sup> (anal. calcd. for C<sub>22</sub>H<sub>24</sub>FN<sub>5</sub>O<sub>7</sub>, *m/z* = 489.5). [α]<sub>D</sub><sup>20</sup> = +108.5° (c 0.25, MeOH).

(2*S*,4*R*,4*aR*)-11-fluoro-8-((*S*)-3-methoxypyrrolidin-1-yl)-2,4-dimethyl-1,2,4,4*a*-tetrahydro-2'*H*,6*H*-spiro[isoxazolo[4,5-*g*][1,4]oxazino[4,3-*a*]quinoline-5,5'-pyrimidine]-2',4',6'(1'*H*,3'*H*)-trione (**13E**). Off-white solid (36 mg, 12%). <sup>1</sup>H NMR (300 MHz, MeOD) δ 7.17 (s, 1H), 4.20 – 4.10 (m, 2H), 4.09 – 4.99 (m, 1H), 4.00 – 3.74 (m, 2H), 3.73 – 3.56 (m, 5H), 3.38 (s, 3H), 3.19 – 3.02 (m, 2H), 2.20 – 2.10 (m, 2H), 1.22 (d, *J* = 6.2 Hz, 3H), 1.01 (d, *J* = 6.3 Hz, 3H). <sup>13</sup>C NMR (101 MHz, MeOD) δ 171.14, 167.80, 158.60, 153.31 (m), 149.46, 134.91 (d, *J* = 240.5 Hz), 134.57, 120.76, 115.55, 108.65, 79.79, 72.68, 72.21, 65.08, 56.56 (d, *J* = 9.7 Hz), 55.45, 54.05, 53.34, 46.36, 39.73, 30.30, 17.34, 16.99. RP-HPLC *t*<sub>R</sub> = 3.046 min (method 1, purity 96%); LC-MS APCI, *m/z* 486.1 [M-H]<sup>-</sup> (anal. calcd. for C<sub>23</sub>H<sub>26</sub>FN<sub>5</sub>O<sub>6</sub>, *m/z* = 487.5). [α]<sub>D</sub><sup>20</sup> = +160.6° (c 0.25, MeOH).

(2*S*,4*R*,4*aR*)-11-fluoro-8-((*S*)-3-(hydroxymethyl)pyrrolidin-1-yl)-2,4-dimethyl-1,2,4,4*a*-tetrahydro-2'*H*,6*H*-spiro[isoxazolo[4,5-*g*][1,4]oxazino[4,3-*a*]quinoline-5,5'-pyrimidine]-2',4',6'-(1'*H*,3'*H*)-trione (**14E**). Off-white solid (76 mg, 23%). <sup>1</sup>H NMR (300 MHz, MeOD) δ 7.19 (s, 1H), 4.24 – 4.12 (m, 1H), 4.09 – 4.01 (m, 1H), 3.98 – 3.75 (m, 2H), 3.74 – 3.45 (m, 6H), 3.42 – 3.34 (m, 1H), 3.20 – 3.03 (m, 2H), 2.67 – 2.46 (m, 1H), 2.24 – 2.07 (m, 1H), 1.94 – 1.75 (m, 1H), 1.22 (d, *J* = 6.2 Hz, 3H), 1.01 (d, *J* = 6.4 Hz, 3H). <sup>13</sup>C NMR (151 MHz, MeOD) δ 171.11, 167.83, 158.32, 153.13 (d, *J* = 13.0 Hz), 149.51, 134.77 (d, *J* = 239.8 Hz), 134.54, 120.61, 115.76, 108.54, 72.66, 72.24, 64.86, 63.27, 56.50 (d, *J* = 9.6 Hz), 53.88, 50.95, 47.17, 41.13, 39.62, 27.52, 17.36, 17.04. RP-HPLC *t*<sub>R</sub> = 3.015 min (method 1, purity 99%); LC-MS APCI, *m/z* 486.1 [M-H]<sup>-</sup> (anal. calcd. for C<sub>23</sub>H<sub>26</sub>FN<sub>5</sub>O<sub>6</sub>, *m/z* = 487.5). [α]<sub>D</sub><sup>20</sup> = +126.9° (c 0.26, MeOH).

(2*S*,4*R*,4*aR*)-8-((*S*)-3-aminopyrrolidin-1-yl)-11-fluoro-2,4-dimethyl-1,2,4,4*a*-tetrahydro-2'*H*,6*H*-spiro[isoxazolo[4,5-*g*][1,4]oxazino[4,3-*a*]quinoline-5,5'-pyrimidine]-2',4',6'-(1'*H*,3'*H*)-trione (**16E**). Beige solid (9 mg, 5%). <sup>1</sup>H NMR (300 MHz, MeOD) δ 7.20 (s, 1H), 4.25 – 4.15 (m, 1H), 4.10 – 3.99 (m, 1H), 3.96 – 3.84 (m, 1H), 3.84 – 3.70 (m, 3H), 3.70 – 3.57 (m, 1H), 3.31 – 3.27 (m, 1H), 3.18 – 3.06 (m, 3H), 2.35 – 2.21 (m, 1H), 1.92 (s, 2H), 1.22 (d, *J* = 6.2 Hz, 3H), 1.01 (d, *J* = 6.3 Hz, 3H). <sup>13</sup>C NMR (101 MHz, MeOD) δ 171.68, 168.27, 158.34, 153.21 (d, *J* = 12.5 Hz), 150.21, 134.78 (d, *J* = 240.1 Hz), 134.63, 120.87, 115.61, 108.42, 72.72, 72.23, 64.95, 56.51 (d, *J* = 9.5 Hz), 55.19, 53.80, 50.68, 46.62, 42.15, 39.66, 17.35, 17.03. RP-HPLC *t*<sub>R</sub> = 0.666 min (method 2, purity 99%); LC-MS APCI, *m/z* 471.2 [M-H]<sup>-</sup> (anal. calcd. for C<sub>22</sub>H<sub>25</sub>FN<sub>6</sub>O<sub>5</sub>, *m/z* = 472.5). [α]<sub>D</sub><sup>20</sup> = +116.1° (c 0.21, MeOH).

(2*S*,4*R*,4*aR*)-11-fluoro-2,4-dimethyl-8-((*S*)-3-(methylamino)pyrrolidin-1-yl)-1,2,4,4*a*-tetrahydro-2'*H*-spiro[isoxazolo[5',4':4,5]benzo[1,2-*b*][1,4]oxazino[4,3-*d*][1,4]oxazine-5,5'-pyrimidine]-2',4',6'(1'*H*,3'*H*)-trione (**17E**). Off-white solid (37 mg, 11%). <sup>1</sup>H NMR (300 MHz, MeOD) δ 7.20 (s, 1H), 4.23 – 4.13 (m, 1H), 4.08 – 3.99 (m, 1H), 3.95 – 3.86 (m, 1H), 3.86 – 3.68 (m, 2H), 3.68 – 3.55 (m, 1H), 3.55 – 3.39 (m, 2H), 3.19 – 2.99 (m, 4H), 2.49 (s, 3H), 2.39 – 2.22 (m, 1H), 2.05 – 1.93 (m, 1H), 1.22 (d, *J* = 6.2 Hz, 3H), 1.00 (d, *J* = 6.3 Hz, 3H). <sup>13</sup>CNMR (151 MHz, MeOD) δ 171.71, 168.31, 158.28, 153.17 (d, *J* = 12.7 Hz), 150.26, 134.71 (d, *J* = 239.6 Hz), 134.61, 120.89, 115.60, 108.33, 72.71, 72.23, 64.90, 58.91, 56.50 (d, *J* = 9.7 Hz), 53.76, 52.71, 46.68, 39.60, 32.83, 30.07, 17.35, 17.04. RP-HPLC *t*<sub>R</sub> = 2.557 min (method 1, purity 99%); LC-MS APCI, *m/z* 485.1 [M-H]<sup>-</sup> (anal. calcd. for C<sub>23</sub>H<sub>27</sub>FN<sub>6</sub>O<sub>5</sub>, *m/z* = 486.5). [α]<sub>D</sub><sup>20</sup> = +97.3° (c 0.26, MeOH).

(2*S*,4*R*,4*aR*)-11-fluoro-8-((*S*)-3-fluoropyrrolidin-1-yl)-2,4-dimethyl-1,2,4,4*a*-tetrahydro-2'*H*,6*H*-spiro[isoxazolo[4,5-*g*][1,4]oxazino[4,3-*a*]quinoline-5,5'-pyrimidine]-2',4',6'(1'*H*,3'*H*)-trione (**18E**). Off-white solid (53 mg, 19%). <sup>1</sup>H NMR (300 MHz, MeOD) δ 7.25 (s, 1H), 5.53 – 5.29 (m, 1H), 4.25 – 4.17 (m, 1H), 4.08 – 4.02 (m, 1H), 3.98 – 3.88 (m, 1H), 3.88 – 3.76 (m, 3H), 3.76 – 3.64 (m, 1H), 3.41 – 3.34 (m, 2H), 3.20 – 3.08 (m, 2H), 2.40 – 2.10 (m, 2H), 1.22 (d, *J* = 6.2 Hz, 3H), 1.01 (d, *J* = 6.4 Hz, 3H). <sup>13</sup>C NMR (151 MHz, MeOD) δ 171.22, 167.89, 158.47, 153.40 (d, *J* = 12.7 Hz), 149.57, 134.89 (d, *J* = 239.7 Hz), 134.67, 121.00, 115.43, 108.49, 93.17, 92.01, 72.68, 72.20, 65.10, 56.57, 54.77 (d, *J* = 23.4 Hz), 46.09, 39.70, 31.76 (d, *J* = 21.8 Hz), 17.32, 16.97. RP-UPLC *t*<sub>R</sub> = 0.965 min (method 2, purity 99%); LC-MS ESI, *m/z* 474.1 [M-H]<sup>-</sup> (anal. calcd. for C<sub>22</sub>H<sub>23</sub>F<sub>2</sub>N<sub>5</sub>O<sub>5</sub>, *m/z* = 475.5). [α]<sub>D</sub><sup>20</sup> = +9.6° (c 0.27, MeOH).

*(S)*-1-((2*S*,4*R*,4*aR*)-11-fluoro-2,4-dimethyl-2',4',6'-trioxo-1,1',2,3',4,4*a*,4',6'-octahydro-2'*H*,6*H*-spiro[isoxazolo[4,5-*g*][1,4]oxazino[4,3-*a*]quinoline-5,5'-pyrimidin]-8-yl)pyrrolidine-3-carbonitrile (**19E**). Off-white solid (10 mg, 8%). <sup>1</sup>H NMR (300 MHz, MeOD) δ 7.22 (s, 1H), 4.25 – 4.15 (m, 1H), 4.10 – 4.04 (m, 1H), 3.98 – 3.83 (m, 2H), 3.83 – 3.75 (m, 1H), 3.75 – 3.64 (m, 1H), 3.56 – 3.45 (m, 1H), 3.18 – 3.07 (m, 2H), 3.03 – 2.93 (m, 3H), 2.54 – 2.41 (m, 1H), 2.40 – 2.28 (m, 1H), 1.22 (d, *J* = 6.2 Hz, 3H), 1.01 (d, *J* = 6.3 Hz, 3H). <sup>13</sup>C NMR (151 MHz, MeOD) δ 172.24, 168.80, 158.02, 153.33 (d, *J* = 13.3 Hz), 150.96, 134.80, 134.70 (d, *J* = 240.2 Hz), 121.40, 120.17, 115.30, 107.97, 72.75, 72.22, 64.99, 56.50 (d), 51.20, 42.26, 39.63, 29.39, 27.81, 17.33, 17.03, 10.74. RP-HPLC *t*<sub>R</sub> = 2.750 min (method 1, purity 99%); LC-MS APCI, *m/z* 481.1 [M-H]<sup>-</sup> (anal. calcd. for C<sub>23</sub>H<sub>23</sub>FN<sub>6</sub>O<sub>5</sub>, *m/z* = 482.5). [α]<sub>D</sub><sup>20</sup> = +59.5° (c 0.28, MeOH).

*(2S,4R,4aR)*-11-fluoro-8-((*S*)-3-hydroxypiperidin-1-yl)-2,4-dimethyl-1,2,4,4*a*-tetrahydro-2',4',6'-(1'*H*,3'*H*)-trione (**21E**). Off-white solid (82 mg, 65%). <sup>1</sup>H NMR (300 MHz, MeOD) δ 7.19 (s, 1H), 4.24 – 4.01 (m, 2H), 3.97 – 3.73 (m, 3H), 3.72 – 3.58 (m, 2H), 3.37 – 3.34 (m, 1H), 3.19 – 2.93 (m, 4H), 2.03 (s, 1H), 1.97 – 1.84 (m, 1H), 1.79 – 1.62 (m, 1H), 1.61 – 1.45 (m, 1H), 1.22 (d, *J* = 6.2 Hz, 3H), 1.01 (d, *J* = 6.4 Hz, 3H). <sup>13</sup>C NMR (101 MHz, DMSO) δ 171.90, 168.61, 161.87, 154.58 (d, *J* = 17.6 Hz), 150.30, 135.12, 135.57 (d, *J* = 240.1 Hz), 121.86, 116.27, 116.25, 109.18, 73.45, 73.02, 66.22, 65.68, 57.27 (d, *J* = 9.5 Hz), 55.47, 54.70, 40.44, 32.95, 22.95, 18.15, 17.82. RP-HPLC *t*<sub>R</sub> = 3.029 min (method 1, purity 99%); LC-MS APCI, *m/z* 486.1 [M-H]<sup>-</sup> (anal. calcd. for C<sub>23</sub>H<sub>26</sub>FN<sub>5</sub>O<sub>6</sub>, *m/z* = 487.5). [α]<sub>D</sub><sup>20</sup> = +164.5° (c 0.28, MeOH).

(2*S*,4*R*,4*aR*)-11-fluoro-8-((*R*)-3-hydroxypiperidin-1-yl)-2,4-dimethyl-1,2,4,4*a*-tetrahydro-2'*H*,6*H*-spiro[isoxazolo[4,5-*g*][1,4]oxazino[4,3-*a*]quinoline-5,5'-pyrimidine]-2',4',6'-(1'*H*,3'*H*)-trione (**22E**). Off-white solid (91 mg, 31%). <sup>1</sup>H NMR (300 MHz, MeOD) δ 7.20 (s, 1H), 4.19 (dd, *J* = 14.2, 2.2 Hz, 1H), 4.05 (d, *J* = 8.8 Hz, 1H), 3.99 – 3.74 (m, 5H), 3.73 – 3.59 (m, 1H), 3.40 – 3.28 (m, 1H), 3.20 – 2.93 (m, 4H), 2.10 – 1.86 (m, 1H), 1.84 – 1.62 (m, 1H), 1.62 – 1.45 (m, 1H), 1.22 (d, *J* = 6.2 Hz, 3H), 1.01 (d, *J* = 6.4 Hz, 3H). <sup>13</sup>C NMR (101 MHz, MeOD) δ 171.92, 168.62, 161.85, 154.66 – 154.06 (m), 150.32, 135.59 (d, *J* = 240.5 Hz), 135.14, 121.86, 116.29, 109.20, 73.46, 73.03, 66.16, 65.70, 57.73, 57.29 (d, *J* = 9.5 Hz), 55.46, 54.70, 40.44, 32.95, 22.93, 18.15, 17.83. RP-HPLC *t*<sub>R</sub> = 3.001 min (method 1, purity 99%); LC-MS APCI, *m/z* 486.1 [M-H]<sup>-</sup> (anal. calcd. for C<sub>23</sub>H<sub>26</sub>FN<sub>5</sub>O<sub>6</sub>, *m/z* = 487.5). [α]<sub>D</sub><sup>20</sup> = +122.0° (c 0.26, MeOH).

(2*S*,4*R*,4*aR*)-11-fluoro-2,4-dimethyl-8-(((*S*)-5-oxopyrrolidin-2-yl)methoxy)-1,2,4,4*a*-tetrahydro-2'*H*,6*H*-spiro[isoxazolo[4,5-*g*][1,4]oxazino[4,3-*a*]quinoline-5,5'-pyrimidine]-2',4',6'-(1'*H*,3'*H*)-trione (**23E**). Off-white solid (25 mg, 8%). <sup>1</sup>H NMR (300 MHz, DMSO-*d*<sub>6</sub>) δ 7.89 (s, 1H), 7.11 (s, 1H), 4.38 – 4.19 (m, 2H), 4.14 – 3.86 (m, 3H), 3.86 – 3.59 (m, 2H), 3.58 – 3.49 (m, 1H), 3.49 – 3.38 (m, 1H), 2.98 – 2.85 (m, 1H), 2.28 – 2.05 (m, 2H), 1.95 – 1.83 (m, 1H), 1.14 (d, *J* = 6.1 Hz, 3H), 0.89 (d, *J* = 6.3 Hz, 3H). <sup>13</sup>C NMR (101 MHz, DMSO) δ 177.33, 171.65, 168.35, 166.30, 153.19 (d, *J*<sub>CF</sub> = 13. Hz), 150.29, 135.58 (d, *J*<sub>CF</sub> = 27.5 Hz), 133.06, 123.27, 114.44, 105.76, 73.27, 72.57, 72.14, 64.96, 56.85 (d, *J*<sub>CF</sub> = 9.0 Hz), 55.33, 52.58, 49.04, 30.04, 23.16, 18.65, 18.59. RP-UPLC *t*<sub>R</sub> = 0.990 min (method 2, purity 100%); LC-MS ESI, *m/z* 500.1 [M-H]<sup>-</sup> (anal. calcd. for C<sub>23</sub>H<sub>24</sub>FN<sub>5</sub>O<sub>7</sub>, *m/z* = 501.5). [α]<sub>D</sub><sup>20</sup> = +180.5° (c 0.21, MeOH).



(2*S*,4*R*,4*aR*)-11-fluoro-2,4-dimethyl-8-(((*R*)-5-oxopyrrolidin-2-yl)methoxy)-1,2,4,4*a*-tetrahydro-2'*H*,6*H*-spiro[isoxazolo[4,5-*g*][1,4]oxazino[4,3-*a*]quinoline-5,5'-pyrimidine]-2',4',6'(1'*H*,3'*H*)-trione (**24E**). Beige amorphous solid (72 mg, 18%). <sup>1</sup>H NMR (300 MHz, DMSO-*d*<sub>6</sub>) δ 11.57 (s, 2H), 7.88 (s, 1H), 7.12 (s, 1H), 4.43 – 4.16 (m, 2H), 4.15 – 3.88 (m, 3H), 3.84 – 3.74 (m, 1H), 3.74 – 3.51 (m, 2H), 3.19 – 3.02 (m, 1H), 2.98 – 2.84 (m, 1H), 2.37 – 2.06 (m, 3H), 2.00 – 1.79 (m, 1H), 1.14 (d, *J* = 6.0 Hz, 3H), 0.89 (d, *J* = 6.3 Hz, 3H). <sup>13</sup>C NMR (151 MHz, DMSO-*d*<sub>6</sub>) δ 177.35, 171.34, 168.09, 166.30, 153.16 (d, *J* = 13.0 Hz), 149.92, 135.70, 134.26 (d, *J* = 240.0 Hz), 123.25, 114.49, 105.77, 73.19, 72.50, 72.15, 64.88, 56.80 (d, *J* = 8.5 Hz), 53.65, 52.56, 38.94, 30.07, 23.14, 18.66, 18.60. RP-UPLC *t*<sub>R</sub> = 0.915 min (method 2, purity 100%); LC-MS ESI, *m/z* 500.1 [M-H]<sup>-</sup> (anal. calcd. for C<sub>23</sub>H<sub>24</sub>FN<sub>5</sub>O<sub>7</sub>, *m/z* = 501.5). [α]<sub>D</sub><sup>20</sup> = +38.6° (c 0.37, MeOH).

(2*S*,4*R*,4*aR*)-11-fluoro-2,4-dimethyl-8-(((*S*)-1-methyl-5-oxopyrrolidin-2-yl)methoxy)-1,2,4,4*a*-tetrahydro-2'*H*,6*H*-spiro[isoxazolo[4,5-*g*][1,4]oxazino[4,3-*a*]quinoline-5,5'-pyrimidine]-2',4',6'(1'*H*,3'*H*)-trione (**25E**). Beige solid (56 mg, 24%). <sup>1</sup>H NMR (300 MHz, DMSO-*d*<sub>6</sub>) δ 7.09 (s, 1H), 4.63 – 4.34 (m, 2H), 4.12 – 4.02 (m, 1H), 3.99 – 3.88 (m, 2H), 3.86 – 3.46 (m, 3H), 3.15 – 3.01 (m, 1H), 2.93 – 2.85 (m, 1H), 2.77 (s, 3H), 2.46 – 2.28 (m, 1H), 2.28 – 2.08 (m, 2H), 1.99 – 1.82 (m, 1H), 1.14 (d, *J* = 6.6 Hz, 4H), 0.88 (d, *J* = 6.3 Hz, 3H). <sup>13</sup>C NMR (151 MHz, DMSO) δ 175.96, 172.17, 168.63, 166.18, 153.09 (d, *J*<sub>CF</sub> = 12.8 Hz), 150.82, 135.74, 134.10 (d, *J*<sub>CF</sub> = 240.5 Hz), 123.27, 114.09, 105.44, 72.69, 72.36, 70.78, 64.91, 58.74, 56.66 (d, *J*<sub>CF</sub> = 9.3 Hz), 53.22, 41.86, 30.14, 28.19, 21.00, 18.38, 18.31. RP-UPLC *t*<sub>R</sub> = 0.927 min (method 2, purity 100%); LC-MS ESI, *m/z* 514.2 [M-H]<sup>-</sup> (anal. calcd. for C<sub>24</sub>H<sub>26</sub>FN<sub>5</sub>O<sub>7</sub>, *m/z* = 515.5). [α]<sub>D</sub><sup>20</sup> = +164.7° (c 0.24, MeOH).

(2*S*,4*R*,4*aR*)-11-fluoro-2,4-dimethyl-8-(((*S*)-5-oxotetrahydrofuran-2-yl)methoxy)-1,2,4,4*a*-tetrahydro-2'*H*,6*H*-spiro[isoxazolo[4,5-*g*][1,4]oxazino[4,3-*a*]quinoline-5,5'-pyrimidine]-2',4',6'-(1'*H*,3'*H*)-trione (**26E**). Off-white solid (29 mg, 10%). <sup>1</sup>H NMR (300 MHz, DMSO-*d*<sub>6</sub>) δ 11.79 (s, 1H), 11.47 (s, 1H), 7.15 (s, 1H), 5.03 – 4.88 (m, 1H), 4.62 – 4.53 (m, 1H), 4.51 – 4.40 (m, 1H), 4.08 (d, *J* = 13.8 Hz, 1H), 3.98 – 3.90 (m, 1H), 3.86 – 3.73 (m, 1H), 3.72 – 3.62 (m, 1H), 3.58 (d, *J* = 14.3 Hz, 1H), 3.16 – 3.03 (m, 1H), 2.98 – 2.87 (m, 1H), 2.62 – 2.53 (m, 2H), 2.43 – 2.24 (m, 1H), 2.20 – 2.02 (m, 1H), 1.14 (d, *J* = 6.1 Hz, 3H), 0.89 (d, *J* = 6.3 Hz, 3H). <sup>13</sup>C NMR (101 MHz, DMSO-*d*<sub>6</sub>) δ 177.37, 171.33, 168.08, 166.08, 153.27 (d, *J* = 13.7 Hz), 149.89, 135.80, 134.10 (d, *J* = 203.5 Hz), 123.38, 114.36, 105.56, 77.64, 72.52, 72.16, 72.06, 64.88, 56.83 (d, *J* = 8.5 Hz), 53.63, 39.05, 28.31, 23.44, 18.68, 18.59. RP-UPLC *t*<sub>R</sub> = 0.953 min (method 2, purity 100%); LC-MS ESI, *m/z* 501.1 [M-H]<sup>-</sup> (anal. calcd. for C<sub>23</sub>H<sub>23</sub>FN<sub>4</sub>O<sub>8</sub>, *m/z* = 502.5). [α]<sub>D</sub><sup>20</sup> = +174.0° (c 0.24, MeOH).

(2*S*,4*R*,4*aR*)-11-fluoro-2,4-dimethyl-8-(((*R*)-5-oxotetrahydrofuran-2-yl)methoxy)-1,2,4,4*a*-tetrahydro-2'*H*,6*H*-spiro[isoxazolo[4,5-*g*][1,4]oxazino[4,3-*a*]quinoline-5,5'-pyrimidine]-2',4',6'-(1'*H*,3'*H*)-trione (**27E**). Off-white solid (25 mg, 11%). <sup>1</sup>H NMR (300 MHz, DMSO-*d*<sub>6</sub>) δ 7.14 (s, 1H), 5.02 – 4.88 (m, 1H), 4.61 – 4.50 (m, 1H), 4.50 – 4.40 (m, 1H), 4.13 – 4.03 (m, 1H), 3.99 – 3.89 (m, 1H), 3.84 – 3.72 (m, 1H), 3.72 – 3.63 (m, 1H), 3.63 – 3.53 (m, 1H), 3.19 – 3.03 (m, 1H), 2.98 – 2.84 (m, 1H), 2.63 – 2.53 (m, 2H), 2.43 – 2.24 (m, 1H), 2.17 – 2.04 (m, 1H), 1.14 (d, *J* = 6.1 Hz, 3H), 0.89 (d, *J* = 6.3 Hz, 3H). <sup>13</sup>C NMR (101 MHz, DMSO-*d*<sub>6</sub>) δ 177.38, 171.36, 168.12, 166.04, 153.28 (d, *J* = 12.8 Hz), 149.94, 135.80, 134.29 (d, *J* = 240.1 Hz), 123.42, 114.34, 105.56, 77.60, 72.52, 72.16, 72.01, 64.90, 56.83 (d, *J* = 9.3 Hz), 53.66, 39.04, 28.32, 23.45, 18.67, 18.59. RP-UPLC *t*<sub>R</sub> = 0.954 min (method 2, purity 100%); LC-MS ESI, *m/z* 501.1 [M-H]<sup>-</sup> (anal. calcd. for C<sub>23</sub>H<sub>23</sub>FN<sub>4</sub>O<sub>8</sub>, *m/z* = 502.5). [α]<sub>D</sub><sup>20</sup> = +138.5° (c 0.23, MeOH).

*(2S,4R,4aR)-11-fluoro-2,4-dimethyl-8-(((R)-2-oxooxazolidin-4-yl)methoxy)-1,2,4,4a-tetrahydro-2'H,6H-spiro[isoxazolo[4,5-g][1,4]oxazino[4,3-a]quinoline-5,5'-pyrimidine]-2',4',6'(1'H,3'H)-trione (28E)*. Beige solid (29 mg, 9%). <sup>1</sup>H NMR (300 MHz, DMSO-*d*<sub>6</sub>) δ 7.95 (s, 1H), 7.07 (s, 1H), 4.51 – 4.40 (m, 1H), 4.40 – 4.29 (m, 2H), 4.28 – 4.17 (m, 2H), 4.13 – 4.04 (m, 1H), 3.94 (d, *J* = 8.8 Hz, 1H), 3.86 – 3.73 (m, 1H), 3.71 – 3.56 (m, 2H), 3.17 – 3.03 (m, 1H), 2.95 – 2.85 (m, 1H), 1.14 (d, *J* = 6.1 Hz, 3H), 0.89 (d, *J* = 6.2 Hz, 3H). <sup>19</sup>F NMR (377 MHz, DMSO) δ -157.50 (s, 1H). RP-UPLC *t*<sub>R</sub> = 0.888 min (method 2, purity 100%); LC-MS ESI, *m/z* 502.1 [M-H]<sup>-</sup> (anal. calcd. for C<sub>22</sub>H<sub>22</sub>FN<sub>5</sub>O<sub>8</sub>, *m/z* = 503.4). [α]<sub>D</sub><sup>20</sup> = +104.6° (c 0.22, MeOH).

*(2S,4R,4aR)-11-fluoro-2,4-dimethyl-8-(((S)-2-oxooxazolidin-4-yl)methoxy)-1,2,4,4a-tetrahydro-2'H,6H-spiro[isoxazolo[4,5-g][1,4]oxazino[4,3-a]quinoline-5,5'-pyrimidine]-2',4',6'(1'H,3'H)-trione (29E)*. Off-white solid (43 mg, 13%). <sup>1</sup>H NMR (300 MHz, DMSO-*d*<sub>6</sub>) δ 7.95 (s, 1H), 7.07 (s, 1H), 4.50 – 4.40 (m, 1H), 4.39 – 4.29 (m, 2H), 4.29 – 4.19 (m, 2H), 4.12 – 4.03 (m, 1H), 3.98 – 3.91 (m, 1H), 3.84 – 3.74 (m, 1H), 3.71 – 3.57 (m, 2H), 3.16 – 3.04 (m, 1H), 2.95 – 2.85 (m, 1H), 1.14 (d, *J* = 6.1 Hz, 3H), 0.89 (d, *J* = 6.3 Hz, 3H). <sup>19</sup>F NMR (377 MHz, DMSO) δ -157.57 (s, 1H). RP-UPLC *t*<sub>R</sub> = 0.888 min (method 2, purity 100%); LC-MS ESI, *m/z* 502.1 [M-H]<sup>-</sup> (anal. calcd. for C<sub>22</sub>H<sub>22</sub>FN<sub>5</sub>O<sub>8</sub>, *m/z* = 503.4). [α]<sub>D</sub><sup>20</sup> = +107.2° (c 0.21, MeOH).

*(2S,4R,4aR)-11-fluoro-2,4-dimethyl-8-(((S)-5-oxopyrrolidin-3-yl)methoxy)-1,2,4,4a-tetrahydro-2'H,6H-spiro[isoxazolo[4,5-g][1,4]oxazino[4,3-a]quinoline-5,5'-pyrimidine]-2',4',6'(1'H,3'H)-trione (30E)*. Off-white solid (67 mg, 21%). <sup>1</sup>H NMR (300 MHz, DMSO-*d*<sub>6</sub>) δ 7.05 (s, 1H), 4.37 – 4.27 (m, 2H), 4.10 – 3.98 (m, 1H), 3.96 – 3.87 (m, 1H), 3.69 – 3.59 (m,

1H), 3.50 – 3.34 (m, 2H), 3.19 – 2.80 (m, 4H), 2.44 – 2.30 (m, 1H), 2.16 – 2.03 (m, 1H), 1.11 (d,  $J = 6.1$  Hz, 3H), 0.86 (d,  $J = 6.3$  Hz, 3H).  $^{13}\text{C}$  NMR (151 MHz, DMSO- $d_6$ )  $\delta$  176.81, 172.13, 168.67, 166.25, 153.08 (d,  $J = 12.9$  Hz), 150.82, 135.70, 134.18 (d,  $J = 240.1$  Hz), 123.31, 114.23, 105.59, 72.62, 72.32, 72.24, 64.95, 56.73 (d,  $J = 9.3$  Hz), 53.30, 44.29, 41.84, 33.55, 33.31, 18.51, 18.46. RP-UPLC  $t_{\text{R}} = 0.891$  min (method 2, purity 100%); LC-MS ESI,  $m/z$  500.1  $[\text{M-H}]^-$  (anal. calcd. for  $\text{C}_{23}\text{H}_{24}\text{FN}_5\text{O}_7$ ,  $m/z = 501.5$ ).  $[\alpha]_{\text{D}}^{20} = +168.8^\circ$  (c 0.24, MeOH).

(2*S*,4*R*,4*aR*)-11-fluoro-2,4-dimethyl-8-(((*R*)-5-oxopyrrolidin-3-yl)methoxy)-1,2,4,4*a*-tetrahydro-2'*H*,6*H*-spiro[isoxazolo[4,5-*g*][1,4]oxazino[4,3-*a*]quinoline-5,5'-pyrimidine]-2',4',6'-(1'*H*,3'*H*)-trione (**31E**). Off-white solid (35 mg, 13%).  $^1\text{H}$  NMR (600 MHz, DMSO- $d_6$ )  $\delta$  7.55 (s, 1H), 7.06 (s, 1H), 4.35 – 4.28 (m, 2H), 4.07 – 4.01 (m, 1H), 3.94 – 3.87 (m, 1H), 3.78 – 3.70 (m, 1H), 3.68 – 3.60 (m, 1H), 3.51 – 3.46 (m, 1H), 3.42 – 3.36 (m, 1H), 3.14 – 3.02 (m, 2H), 2.94 – 2.83 (m, 2H), 2.33 – 2.27 (m, 1H), 2.09 – 2.03 (m, 1H), 1.11 (d,  $J = 6.2$  Hz, 3H), 0.85 (d,  $J = 6.3$  Hz, 3H).  $^{13}\text{C}$  NMR (151 MHz, DMSO- $d_6$ )  $\delta$  176.11, 171.93, 168.61, 166.26, 153.13 (d,  $J = 12.8$  Hz), 150.67, 135.72, 134.24 (d,  $J = 240.0$  Hz), 123.41, 114.26, 105.65, 72.58, 72.45, 72.13, 64.94, 56.81 (d,  $J = 8.9$  Hz), 53.42, 44.34, 39.06, 33.70, 33.36, 18.63, 18.62. RP-UPLC  $t_{\text{R}} = 0.888$  min (method 2, purity 98%); LC-MS ESI,  $m/z$  500.1  $[\text{M-H}]^-$  (anal. calcd. for  $\text{C}_{23}\text{H}_{24}\text{FN}_5\text{O}_7$ ,  $m/z = 501.5$ ).  $[\alpha]_{\text{D}}^{20} = +175.9^\circ$  (c 0.23, MeOH).

(2*S*,4*R*,4*aR*)-11-fluoro-2,4-dimethyl-8-(2-(((*S*)-5-oxopyrrolidin-2-yl)ethoxy)-1,2,4,4*a*-tetrahydro-2'*H*,6*H*-spiro[isoxazolo[4,5-*g*][1,4]oxazino[4,3-*a*]quinoline-5,5'-pyrimidine]-2',4',6'-(1'*H*,3'*H*)-trione (**32E**). Beige solid (44 mg, 10%).  $^1\text{H}$  NMR (300 MHz, DMSO- $d_6$ )  $\delta$  11.59 (s, 2H), 7.81 (s, 1H), 7.10 (s, 1H), 4.50 – 4.31 (m, 2H), 4.12 – 4.01 (m, 1H), 3.96 – 3.89 (m, 1H), 3.86 – 3.72 (m, 2H), 3.72 – 3.63 (m, 1H), 3.60 – 3.52 (m, 1H), 3.16 – 3.04 (m, 1H),

2.97 – 2.85 (m, 1H), 2.23 – 2.06 (m, 3H), 2.02 – 1.89 (m, 2H), 1.79 – 1.61 (m, 1H), 1.14 (d,  $J = 6.1$  Hz, 3H), 0.89 (d,  $J = 6.3$  Hz, 3H).  $^{13}\text{C}$  NMR (101 MHz, DMSO- $d_6$ )  $\delta$  177.05, 171.39, 168.08, 166.18, 153.11 (d,  $J = 12.5$  Hz), 149.94, 135.63, 134.33 (d,  $J = 240.2$  Hz), 123.14, 114.34, 105.97, 72.53, 72.16, 68.16, 64.93, 56.93 – 56.72 (m), 53.59, 51.08, 39.07, 35.97, 30.29, 27.31, 18.67, 18.59. RP-UPLC  $t_{\text{R}} = 0.954$  min (method 2, purity 97%); LC-MS ESI,  $m/z$  514.1  $[\text{M-H}]^-$  (anal. calcd. for  $\text{C}_{24}\text{H}_{26}\text{FN}_5\text{O}_7$ ,  $m/z = 515.5$ ).  $[\alpha]_{\text{D}}^{20} = +151.7^\circ$  (c 0.24, MeOH).

(2*S*,4*R*,4*aR*)-11-fluoro-2,4-dimethyl-8-((5-methyl-1,3,4-oxadiazol-2-yl)methoxy)-1,2,4,4*a*-tetrahydro-2'*H*,6*H*-spiro[isoxazolo[4,5-*g*][1,4]oxazino[4,3-*a*]quinoline-5,5'-pyrimidine]-2',4',6'-(1'*H*,3'*H*)-trione (**33E**). Off-white solid (60 mg, 68%).  $^1\text{H}$  NMR (400 MHz, DMSO- $d_6$ )  $\delta$  11.65 (s, 2H), 7.13 (d,  $J = 1.1$  Hz, 1H), 5.66 (s, 2H), 4.12 – 4.03 (m, 1H), 3.98 – 3.91 (m, 1H), 3.84 – 3.73 (m, 1H), 3.73 – 3.62 (m, 1H), 3.59 – 3.52 (m, 1H), 3.15 – 3.05 (m, 1H), 2.97 – 2.88 (m, 1H), 2.54 (s, 3H), 1.14 (d,  $J = 6.2$  Hz, 3H), 0.89 (d,  $J = 6.4$  Hz, 3H).  $^{13}\text{C}$  NMR (101 MHz, DMSO- $d_6$ )  $\delta$  171.38, 168.12, 165.61 – 164.97 (m), 161.87, 153.50 (d,  $J = 13.0$  Hz), 149.97, 135.96, 134.19 (d,  $J = 240.3$  Hz), 114.22 (d,  $J = 3.3$  Hz), 105.10, 72.55, 72.16, 64.95, 61.68, 56.83 (d,  $J = 9.4$  Hz), 53.50, 18.66, 18.58, 10.93.  $^{19}\text{F}$  NMR (377 MHz, DMSO- $d_6$ )  $\delta$  -157.50. RP-UPLC  $t_{\text{R}} = 0.983$  min (method 2, purity 100%); LC-MS ESI,  $m/z$  499.1  $[\text{M-H}]^-$  (anal. calcd. for  $\text{C}_{22}\text{H}_{21}\text{FN}_6\text{O}_7$ ,  $m/z = 500.4$ ).  $[\alpha]_{\text{D}}^{20} = +194^\circ$  (c 0.27, MeOH).

(2*S*,4*R*,4*aR*)-11-fluoro-2,4-dimethyl-8-((*S*)-4-methyl-2-oxooxazolidin-3-yl)-2,3,4,4*a*-tetrahydro-1*H*,2'*H*,6*H*-spiro[isoxazolo[4,5-*g*]pyrazino[1,2-*a*]quinoline-5,5'-pyrimidine]-2',4',6'-(1'*H*,3'*H*)-trione (**34E**). White solid (30 mg, 5.0%).  $^1\text{H}$  NMR (300 MHz, MeOD)  $\delta$  7.63 (s, 1H), 4.69 (dd,  $J = 8.7, 5.8$  Hz, 2H), 4.32 – 4.15 (m, 3H), 3.36 – 3.31 (m, 2H), 3.29-3.07 (m, 3H) 1.51 (d,  $J = 5.1$  Hz, 3H), 1.25 (d,  $J = 6.3$  Hz, 3H), 1.04 (d,  $J = 6.6$  Hz, 3H).  $^{13}\text{C}$  NMR (151

MHz, DMSO-*d*<sub>6</sub>) δ 172.58, 169.41, 154.26, 153.34 (d, *J* = 12.8 Hz), 152.48, 150.20, 135.79, 133.75 (d, *J* = 236.5 Hz), 123.42, 118.48, 107.70, 70.55, 66.95, 53.42, 53.50, 52.66, 51.55, 40.56, 39.67, 21.45, 19.40, 17.75. RP-UPLC *t*<sub>R</sub> = 2.93 min (method 1, purity 98%); LC-MS ESI, *m/z* 487.2 [M+H]<sup>+</sup> (anal. calcd. for C<sub>22</sub>H<sub>23</sub>FN<sub>6</sub>O<sub>6</sub>, *m/z* = 486.5). [α]<sub>D</sub><sup>20</sup> = +131° (c 0.5, MeOH).

*(2S,4R,4aR)-11-fluoro-3-hydroxy-2,4-dimethyl-8-((S)-4-methyl-2-oxooxazolidin-3-yl)-2,3,4,4a-tetrahydro-1H,2'H,6H-spiro[isoxazolo[4,5-g]pyrazino[1,2-a]quinoline-5,5'-pyrimidine]-2',4',6'(1'H,3'H)-trione (35E)*. Light pink solid (40 mg, 8.0%). <sup>1</sup>H NMR (300 MHz, DMSO-*d*<sub>6</sub>) δ 11.76 (s, 1H), 11.45 (s, 1H), 8.05 (s, 1H), 7.58 (s, 1H), 4.72 – 4.60 (m, 2H), 4.19 (dd, *J* = 7.6, 4.3 Hz, 1H), 4.12 – 3.97 (m, 2H), 3.61 (d, *J* = 14.4 Hz, 1H), 3.11-3.02 (m, 1H), 2.88 (d, *J* = 14.4 Hz, 1H), 2.78-2.63 (m, 2H), 1.41 (d, *J* = 5.8 Hz, 3H), 1.10 (d, *J* = 5.9 Hz, 3H), 0.88 (d, *J* = 6.3 Hz, 3H). <sup>13</sup>C NMR (151 MHz, DMSO-*d*<sub>6</sub>) δ 172.40, 171.54, 168.34, 154.46, 153.87 (d, *J* = 12.5 Hz), 152.62, 149.97, 135.52 (d, *J* = 240.3 Hz), 123.21, 118.35, 107.36, 70.71, 64.08, 62.84, 61.52, 54.88, 53.97, 53.31, 39.03, 17.99, 17.19, 16.19. RP-UPLC *t*<sub>R</sub> = 3.606 min (method 1, purity 98%); LC-MS ESI, *m/z* 503.1 [M+H]<sup>+</sup> (anal. calcd. for C<sub>22</sub>H<sub>23</sub>FN<sub>6</sub>O<sub>7</sub>, *m/z* = 502.5). [α]<sub>D</sub><sup>20</sup> = +136° (c 1.0, MeOH).

*(2S,4R,4aR)-3-acetyl-11-fluoro-2,4-dimethyl-8-((S)-4-methyl-2-oxooxazolidin-3-yl)-2,3,4,4a-tetrahydro-1H,2'H,6H-spiro[isoxazolo[4,5-g]pyrazino[1,2-a]quinoline-5,5'-pyrimidine]-2',4',6'(1'H,3'H)-trione (36E)*. White solid (55 mg, 19%). <sup>1</sup>H NMR (300 MHz, DMSO-*d*<sub>6</sub>) δ 11.40 (br s, 2H), 7.63 (s, 1H), 4.87 (s, 1H), 4.74 – 4.63 (m, 2H), 4.28 – 4.18 (m, 1H), 4.11 – 4.00 (m, 1H), 3.93 – 3.76 (m, 2H), 3.64 – 3.54 (m, 1H), 3.45 – 3.40 (m, 2H), 1.89 (s, 3H), 1.42 (d, *J* = 5.7 Hz, 3H), 1.34 (d, *J* = 7.2 Hz, 3H), 1.21 (d, *J* = 6.3 Hz, 3H). <sup>13</sup>C NMR (101 MHz, DMSO-*d*<sub>6</sub>) δ 172.26, 170.31, 169.37, 154.60, 152.68, 150.19, 127.29, 122.67, 120.03, 118.85

(2C), 108.75, 94.16, 70.76, 65.95, 53.23 (2C), 48.57, 43.62, 35.41, 22.92, 21.65, 17.88 (2C). RP-UPLC  $t_R = 0.777$  min (method 2, purity 98%); LC-MS ESI,  $m/z$  529.2  $[M+H]^+$  (anal. calcd. for  $C_{24}H_{25}FN_6O_7$ ,  $m/z = 528.4$ ).  $[\alpha]_D^{20} = +135^\circ$  (c 0.4, MeOH).

*(2S,4R,4aR)-11-fluoro-8-((S)-3-hydroxypyrrolidin-1-yl)-2,4-dimethyl-2',4',6'-trioxo-1,1',2,3',4,4a,4',6'-octahydro-2'H,3H,6H-spiro[isoxazolo[4,5-g]pyrazino[1,2-a]quinoline-5,5'-pyrimidine]-3-carbonitrile (40E)*. Off-white solid (135 mg, 27%).  $^1H$  NMR (300 MHz, MeOD)  $\delta$  7.14 (s, 1H), 4.12 (d,  $J = 9.3$  Hz, 1H), 4.09 – 4.01 (m, 1H), 3.76 – 3.35 (m, 7H), 3.28 (dd,  $J = 14.3, 1.7$  Hz, 1H), 3.18 – 3.06 (m, 1H), 3.01 (d,  $J = 14.2$  Hz, 1H), 2.05 – 1.89 (m, 2H), 1.30 (d,  $J = 6.5$  Hz, 3H), 1.09 – 1.05 (m, 3H).  $^{13}C$  NMR (101 MHz, MeOD)  $\delta$  172.20, 169.39, 160.00, 154.64, 150.97, 137.95, 135.83, 122.52, 117.30, 114.94, 111.09, 71.70, 65.09, 57.85, 56.50, 55.96, 47.88, 41.15, 35.02, 30.85, 24.41, 16.77, 16.44. RP-UPLC  $t_R = 2.744$  min (method 1, purity 80%); LC-MS ESI,  $m/z$  496.1  $[M-H]^-$  (anal. calcd. for  $C_{23}H_{24}FN_7O_5$ ,  $m/z = 497.5$ ).  $[\alpha]_D^{20} = +139^\circ$  (c 0.24, MeOH).

*(2S,4R,4aR)-11-fluoro-2,4-dimethyl-2',4',6'-trioxo-8-(((S)-5-oxopyrrolidin-2-yl)methoxy)-1,1',2,3',4,4a,4',6'-octahydro-2'H,3H,6H-spiro[isoxazolo[4,5-g]pyrazino[1,2-a]quinoline-5,5'-pyrimidine]-3-carbonitrile (42E)*. Off-white solid (33 mg, 9.8%).  $^1H$  NMR (600 MHz, DMSO- $d_6$ )  $\delta$  7.87 (s, 1H), 7.13 (d,  $J = 1.2$  Hz, 1H), 4.32 – 4.19 (m, 2H), 4.08 (d,  $J = 9.3$  Hz, 1H), 4.01 (dt,  $J = 14.3, 2.3$  Hz, 1H), 3.95 (dd,  $J = 8.2, 4.4$  Hz, 1H), 3.52 – 3.48 (m, 1H), 3.48 – 3.41 (m, 1H), 3.39 (dd,  $J = 9.3, 6.8$  Hz, 1H), 3.19 (ddd,  $J = 15.0, 10.7, 1.8$  Hz, 1H), 2.93 (dd,  $J = 14.3, 1.5$  Hz, 1H), 2.29 – 2.21 (m, 1H), 2.21 – 2.08 (m, 2H), 1.91 – 1.83 (m, 1H), 1.26 (d,  $J = 6.5$  Hz, 3H), 1.00 (d,  $J = 6.8$  Hz, 3H).  $^{13}C$  NMR (151 MHz, DMSO- $d_6$ )  $\delta$  177.37, 171.59, 168.78, 166.30, 152.97 (d,  $J = 13.1$  Hz), 150.76, 135.59, 134.54 (d,  $J = 240.8$  Hz), 123.61, 114.42, 113.67, 106.51, 73.31, 63.46, 55.90 (d,  $J = 8.1$  Hz), 54.98, 54.36, 54.21, 52.55, 39.15,

30.04, 23.12, 16.31, 16.22. RP-UPLC  $t_R$  = 0.883 min (method 2, purity 100%); LC-MS ESI,  $m/z$  524.2 [M-H]<sup>-</sup> (anal. calcd. for C<sub>24</sub>H<sub>24</sub>FN<sub>7</sub>O<sub>6</sub>,  $m/z$  = 525.5).  $[\alpha]_D^{20}$  = +190° (c 0.22, MeOH).

*(2R,4S,4aS)-11-fluoro-2,4-dimethyl-8-(((S)-5-oxopyrrolidin-2-yl)methoxy)-2,3,4,4a-tetrahydro-1H,2'H,6H-spiro[isoxazolo[4,5-g]pyrido[1,2-a]quinoline-5,5'-pyrimidine]-2',4',6'(1'H,3'H)-trione (43E)*. Beige solid (45 mg, 10%). <sup>1</sup>H NMR (300 MHz, DMSO-*d*<sub>6</sub>) δ 11.73 (s, 1H), 11.39 (s, 1H), 7.89 (s, 1H), 7.51 (s, 1H), 7.07 (s, 1H), 4.28 (qd,  $J$  = 10.4, 4.7 Hz, 2H), 3.94 (d,  $J$  = 16.6 Hz, 2H), 3.78 (d,  $J$  = 9.9 Hz, 1H), 3.56 – 3.42 (m, 2H), 2.95 – 2.82 (m, 2H), 2.21 – 2.10 (m, 2H), 1.92 – 1.66 (m, 4H), 0.90 (d,  $J$  = 6.4 Hz, 3H), 0.65 (d,  $J$  = 6.4 Hz, 3H). – **NH Peaks visible.** <sup>13</sup>C NMR (151 MHz, DMSO-*d*<sub>6</sub>) δ 178.11, 172.76, 169.21, 167.18, 154.11 (d,  $J$  = 12.6 Hz), 150.99, 137.68, 135.20 (d,  $J$  = 239.8 Hz), 124.55, 114.99, 106.15, 74.08, 67.48, 59.46 (d,  $J$  = 8.5 Hz), 55.45, 53.45, 44.32, 39.94, 33.78, 32.71, 30.99, 24.19, 20.02, 19.74. RP-UPLC  $t_R$  = 1.034 min (method 2, purity 96%); LC-MS ESI,  $m/z$  498.2 [M-H]<sup>-</sup> (anal. calcd. for C<sub>24</sub>H<sub>26</sub>FN<sub>6</sub>O<sub>6</sub>,  $m/z$  = 499.5).  $[\alpha]_D^{20}$  = +137° (c 0.25, MeOH).

*(2R,4R,4aR)-11-fluoro-2,4-dimethyl-8-(5-methyl-1,3,4-oxadiazol-2-yl)-2',4',6'-trioxo-1,1',2,3',4,4a,4',6'-octahydro-2'H,3H,6H-spiro[isoxazolo[4,5-g]pyrazino[1,2-a]quinoline-5,5'-pyrimidine]-3-carbonitrile (44E)*. White solid (26 mg, 4.1%). RP-UPLC  $t_R$  = 0.961 min (method 2, purity 100%); LC-MS ESI,  $m/z$  493.1 [M-H]<sup>-</sup> (anal. calcd. for C<sub>22</sub>H<sub>19</sub>FN<sub>8</sub>O<sub>5</sub>,  $m/z$  = 494.4).

*(2S,3R,4R,4aS)-11-fluoro-3-hydroxy-2,4-dimethyl-8-(5-methyl-1,3,4-oxadiazol-2-yl)-2,3,4,4a-tetrahydro-1H,2'H,6H-spiro[isoxazolo[4,5-g]pyrido[1,2-a]quinoline-5,5'-pyrimidine]-2',4',6'(1'H,3'H)-trione (45E)*. Light yellow solid (49 mg, 18%). <sup>1</sup>H NMR (300



MHz, DMSO-*d*<sub>6</sub>) δ 11.55 (brs, 2H), 7.60 (s, 1H), 4.73 (d, *J* = 7.6 Hz, 1H), 3.98 – 3.93 (m, 2H), 3.74 (d, *J* = 14.8 Hz, 1H), 3.01 (t, *J* = 13.0 Hz, 1H), 2.91 (d, *J* = 14.3 Hz, 1H), 2.75 (q, *J* = 9.15 Hz, 1H), 2.68 (s, 3H), 1.73 – 1.63 (m, 2H), 1.01 (d, *J* = 6.4 Hz, 3H), 0.76 (d, *J* = 6.6 Hz, 3H). <sup>13</sup>C NMR (101 MHz, DMSO-*d*<sub>6</sub>) δ 171.80, 168.44, 165.71, 156.77, 153.53 (d, *J* = 13.07 Hz), 150.11, 144.76, 137.01, 133.86 (d, *J* = 242.57 Hz), 126.63, 115.71, 110.48, 78.92, 64.95, 55.86 (d, *J* = 8.12 Hz), 54.55, 40.90, 38.76, 15.57, 14.78, 11.06. *Note: one of the peak is for two carbons.* <sup>19</sup>F NMR (377 MHz, DMSO-*d*<sub>6</sub>) δ -157.68. RP-UPLC *t*<sub>R</sub> = 0.941 min (method 2, purity 97%); LC-MS ESI, *m/z* 485.2 [M+H]<sup>+</sup> (anal. calcd. for C<sub>22</sub>H<sub>21</sub>FN<sub>6</sub>O<sub>6</sub>, *m/z* = 484.4). [α]<sub>D</sub><sup>20</sup> = -198° (c 0.19, THF).

## 5. DNA gyrase supercoiling assay.

1 U (unit or the amount of enzyme required to fully supercoil the substrate) of *M. tuberculosis* gyrase was incubated with 0.5 μg of relaxed pBR322 DNA in a 30 μl reaction at 37°C for 30 minutes under the following conditions: 50 mM HEPES-KOH (pH 7.9), 6 mM MgOAc, 4 mM DTT, 1 mM ATP, 100 mM potassium glutamate, 2 mM spermidine and 0.05 mg/ml BSA. Each reaction was stopped by the addition of 30 μl chloroform/iso-amyl alcohol (24:1) and 20 μl Stop Dye (40% sucrose, 100 mM Tris.HCl (pH 7.5), 10 mM EDTA, 0.5 μg/ml bromophenol blue), before being loaded on a 1.0% TAE (Tris-acetate 0.04 mM, EDTA 0.002 mM) gels run at 80V for 3 h. Bands were visualized by ethidium staining for 10 minutes, de-stained for 10 minutes in water and analyzed by gel documentation equipment (Syngene, Cambridge, UK) and quantitated using Syngene Gene Tools software. Raw gel data (fluorescent band volumes) collected from Syngene, GeneTools gel analysis software were calculated as a % of the 100% control (the fully supercoiled DNA band) and converted to % inhibition. The raw gel data was analyzed using SigmaPlot Version 13 (2015). The

global curve fit non-linear regression tool was used to calculate IC<sub>50</sub> data using the following equation: Exponential Decay, Single, 2 Parameter  $f = a \cdot \exp(-b \cdot x)$ .

## 6. *In vitro* ADMET assays

**6.1 Kinetic solubility.** Solubility was performed using a miniaturised shake flask method. 10 mM stock solutions of each compound were used to prepare calibration standards (10-220  $\mu$ M) in DMSO. The same 10mM stock solutions were accurately dispensed in duplicate into 96-well plates and the DMSO dried down (MiVac GeneVac, 90 min, 37 °C). Thereafter, the samples were reconstituted (200  $\mu$ M) in aqueous solution and shaken (20 hours, 25 °C). The solutions were analysed by means of HPLC-DAD (Agilent 1200 Rapid Resolution HPLC with a diode array detector). Solubility was then determined using the peak areas of the aqueous samples and the best fit calibration curves constructed using the calibration standard.<sup>3</sup>

**6.2 Lipophilicity (LogD<sub>7.4</sub>).** The lipophilicity assay was performed in triplicate using a shake-flask procedure. 10 mM stock solutions of each test compound were used to spike (100  $\mu$ M) a 1:1 mixture of phosphate buffer (pH 7.4) and n-octanol. The solutions were shaken vigorously (1500 rpm) on an orbital shaker for 3 hours at room temperature. Thereafter the samples were centrifuged in order to fully separate the two immiscible fluids. The samples were analysed by HPLC-DAD (Agilent 1200 Rapid Resolution HPLC with a diode array detector) and the amount of compound in the buffer and n-octanol were used to determine the partition coefficient, LogD<sub>7.4</sub>.<sup>4</sup>

**6.3. Cytotoxicity.** Compounds were screened for *in vitro* cytotoxicity against HepG2 cell line using the 3-(4,5-dimethylthiazol-2-yl)-2,5-diphenyltetrazoliumbromide (MTT)-assay.<sup>5</sup> The

tetrazolium salt MTT was used to measure all growth and chemosensitivity. The tetrazolium ring is cleaved in active mitochondria. Thus, only viable cells are able to reduce the water-soluble yellow coloured MTT to water-insoluble purple coloured formazan. Formazan crystals are dissolved in DMSO. The test samples were tested in triplicate. The test samples were prepared to a 20 mg/mL stock solution in 100% DMSO. Stock solutions were stored at -20 °C. Further dilutions were prepared in complete medium on the day of the experiment. Samples were tested as a suspension if not completely dissolved. Emetine was used as the reference drug in all experiments. The initial concentration of emetine was 100 µg/mL, which was serially diluted in complete medium with 10-fold dilutions to give 6 concentrations, the lowest being 0.001 µg/mL. The same dilution technique was applied to all test samples. The highest concentration of solvent to which the cells were exposed to have no measurable effect on the cell viability (data not shown). The 50% inhibitory concentration (IC<sub>50</sub>) values were obtained from full dose-response curves, using a non-linear dose-response curve fitting analysis via GraphPad Prism v.4 software.



CLUSTAL O(1.2.4) sequence alignment was carried out for GyrB from *Mycobacterium tuberculosis* (MYCTU), *Staphylococcus aureus* (STAAU) and *Escherichia coli* (ECOLI).

Residues highlighted in yellow are those referred to in the text. The residues in green represent the QRDR in *M. tuberculosis*.

```

SP|P9WG45|GYRB_MYCTU  --MAAQKKAQDEYGAASITILEGLEAVRKRPGMYIGSTG-ERGLHHLIWEVVDNAVDEA  57
SP|P0A0K8|GYRB_STAAU  MVTALSDVNNNTDNYGAGQIQVLEGLEAVRKRPGMYIGSTS-ERGLHHLVWEIVDNSIDEA  59
SP|P0AES6|GYRB_ECOLI  -----MSNSYDSSSIKVLKGLDAVRKRPGMYIGTDDGTGLHHMVFEVVDNAIDEA  51
                          :.*.:.* :*:*****.*.  *****:*.***:***

SP|P9WG45|GYRB_MYCTU  MAGYATVNVVLLDEGGVEVADDGRGIPVATHA-SGIPTVDVMTQLHAGGKFDSDAYAI  116
SP|P0A0K8|GYRB_STAAU  SGGLEHGVGSSVNNALSQDLEVYVHRNETIYHQAYKKGVPQFDLKEVGTDDKTGTVIRFKA  119
SP|P0AES6|GYRB_ECOLI  LAGHCHEIIVTIHADNSVSVQDDGRGIPTGIHPEEGVSAAEIVMTVLHAGGKFDSDNYK  111
                          :**.:. :*. :.* ******. : * :.:** *****.*** :

SP|P9WG45|GYRB_MYCTU  SGGLEHGVGSSVNNALSTRLEVEIKRDGYEWSQVYEKSEPL-GLKQGAAPTCKTGSTVRFWA  175
SP|P0A0K8|GYRB_STAAU  SGGLEHGVGSSVNNALSQDLEVYVHRNETIYHQAYKKGVPQFDLKEVGTDDKTGTVIRFKA  179
SP|P0AES6|GYRB_ECOLI  SGGLEHGVGSSVNNALSQKLELVIQREGKIHRQIYEHGVQAPLAVTGETEKTGTVMVRFWP  171
                          ***** ***** **: :.*: * *:. * * .*.***: :**

SP|P9WG45|GYRB_MYCTU  DPAVFE-TTEYDFETVARRLQEMAFNLKGLTINLTDERTQDEVVVSDVAEAPKSS  234
SP|P0A0K8|GYRB_STAAU  DGEIETFTTYVNYETLQQRIRELAFNLKGIQITLDRDE-----  219
SP|P0AES6|GYRB_ECOLI  SLETFTNVTEFFEYELAKRLELRSFLNSGVSIRLRDKRDG-----  211
                          . * .* :.*: :*:***.*: * * *.*

SP|P9WG45|GYRB_MYCTU  ERAAESTAPHKVKSRTFHYPGGLVDFVKHINRTKNAIHSSIVDFSGKGTGHEVEIAMQWN  294
SP|P0A0K8|GYRB_STAAU  -----ENVREDSYHYEGGIKSYVELLNENKEPIHDEPIYHQSKDDIEVEIAIQYN  270
SP|P0AES6|GYRB_ECOLI  -----KEDHFHYEGGIKAFVEYLKKNKTPIHPIFYFSTEKDGIGVEVALQWN  259
                          :.* ** : :*:*. * ** . . . . **:*:*

SP|P9WG45|GYRB_MYCTU  AGYSESVHTFANTINTHEGGTHEEGFRSALTSVNVKYAKDRKLLKDKDPNLTGDDIREGL  354
SP|P0A0K8|GYRB_STAAU  SGYATNLLTYANNIHTYEGGTHEDGFRALTRVLNSYGLSSKIMKEEKDRLSGEDTREGM  330
SP|P0AES6|GYRB_ECOLI  DGFQENLYCFTNNIQRDGGTHLAGFRAAMRTLNAYMDKEGYSKKAKVATGDDAREGL  319
                          :.* :.* * :***** **: * * .: * * . . . . :*: * ***:

SP|P9WG45|GYRB_MYCTU  AAVISVKVSEPFEGQTKTKLGNTEVKSFVQKVCNEQLTHWFEANPTDAKVVVNKAVSSA  414
SP|P0A0K8|GYRB_STAAU  TAIISIKHDPQFEGQTKTKLGNSEVRQVVDKLFSEHFERFLYENPQVARTVVEKIMAA  390
SP|P0AES6|GYRB_ECOLI  IAVVSVKVPDPKFSQTKDKLVSEVKSVAVEQQMNELLAEYLLLENPTDAKIVVGKIIDA  379
                          :.:*:* :*:*.*** ** :.*:.* **: . : . : . . ** * : ** * : :.*

SP|P9WG45|GYRB_MYCTU  QARIAARKARELVRRKSATDIGGLPGKLADCRSTDPRKSELYVVEGD SAGGSAKSGRDS  474
SP|P0A0K8|GYRB_STAAU  RARVAARKAREVTRRKSALDVASLPGKLADCSSKSPREEEIFLVEGD SAGGSTKSGRDSR  450
SP|P0AES6|GYRB_ECOLI  RAREAARRAREMTRRKGALDLAGLPGKLADQCERDPALSELYLVEGD SAGGSAKQGRNRK  439
                          :** :*:*:*:*:*:*:*:*:*:*:*:*:*:*:*:*:*:*:*:*:*:*:*:*:*:*:*:*:*:*

SP|P9WG45|GYRB_MYCTU  EQAILP RGKILNVEKARIDRLKNTEVQAIITALGTGIH-DEFDIGKLRHKKIVLMADA  533
SP|P0A0K8|GYRB_STAAU  EQAILP RGKILNVEKARLDRLNNNEIRQMITAFGTGIGGD-FDLAKARYHKIVIMTDA  509
SP|P0AES6|GYRB_ECOLI  NQAILP RGKILNVEKARFDKMLS SQEVATLITALGCGIGRDEYNPKLRYHSIIIMTDA  499
                          *****:***:*****:*.:. * . :***:* ** * :. * ***.***:***

SP|P9WG45|GYRB_MYCTU  DVDGQHIITLLLTLLFRFMRLIENGHVFLAQPPPLYKWKQSRSDPEFAYSDRERDGLLEA  593
SP|P0A0K8|GYRB_STAAU  DVDGAHIRTLLLTFFYRFMRPLIEAGYVYIAQPPPLYKLTQGGKQK-YVYNDRELDKLGSE  568
SP|P0AES6|GYRB_ECOLI  DVDGSHIRTLLLTFFYRQMPPIVERGHVYIAQPPPLYKVKKGQKQ-QYIKDDEAMDQYQIS  558
                          **** * *****:.* * :.* *:*:*****:.. :.. : .*. *

SP|P9WG45|GYRB_MYCTU  -----
SP|P0A0K8|GYRB_STAAU  -----
SP|P0AES6|GYRB_ECOLI  IALDGTALHTNASAPALAGEALEKLVSEYNATQKMINRMERRYPKAMKELIYQPTLTEA  618

SP|P9WG45|GYRB_MYCTU  -----
SP|P0A0K8|GYRB_STAAU  -----L-----  569
SP|P0AES6|GYRB_ECOLI  DLSDDQVTVTRVWVNALVSELNDKEQHGSQWKFDVHTNAEQNLFEPIVVRTHGVDTDYPLD  678

SP|P9WG45|GYRB_MYCTU  -----GLK-----AGKKINKEDGIQR  609
SP|P0A0K8|GYRB_STAAU  -----NTPKWSIAR  579
SP|P0AES6|GYRB_ECOLI  HEFITGGEYRRICTLGEKLRGLLEDAFIERGERRQFVASFEQALDWLVKESRRGLSIQR  738
                          : * *

SP|P9WG45|GYRB_MYCTU  YKGLGEMDAKELWETTMDSVVRVLRQVTLDDAAADELFSILMGEDVDARRSFITRNAKD  669
SP|P0A0K8|GYRB_STAAU  YKGLGEMNADQLWETTMNPEHRALLQVKLEDAIEADQTFEMLMGDVENRRQFIEDNAVY  639
SP|P0AES6|GYRB_ECOLI  YKGLGEMNPQLWETTMDPESRRMLRVTVKDAIADQLFTTLMGDAVEPRRAFIEENALK  798
                          *****: :*****:*. * :*:.* ** * ***: * ** * **

SP|P9WG45|GYRB_MYCTU  VRFLDV 675
SP|P0A0K8|GYRB_STAAU  A-NLDF 644
SP|P0AES6|GYRB_ECOLI  AANIDI 804
                          . :*.

```

## 8. QC data for selected compounds (NMR spectra and UPLC-MS traces)

### Compound 8

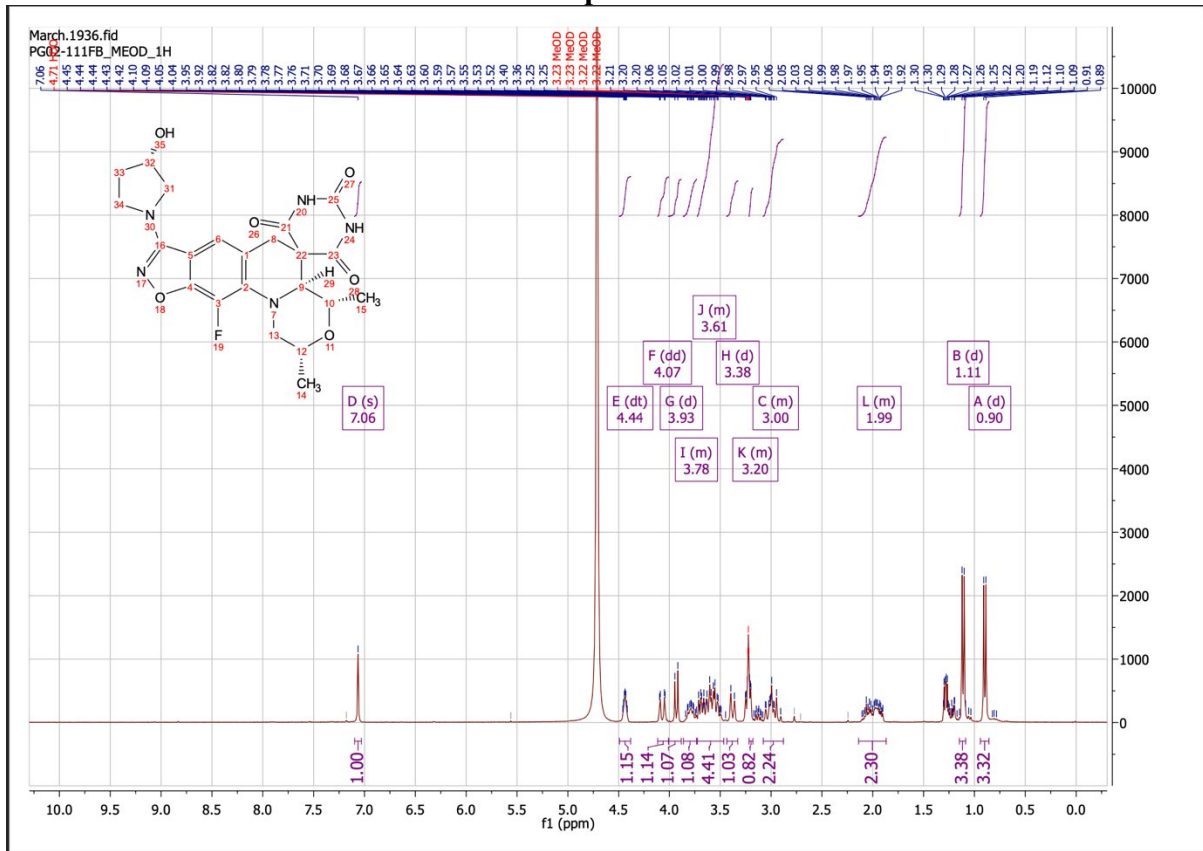

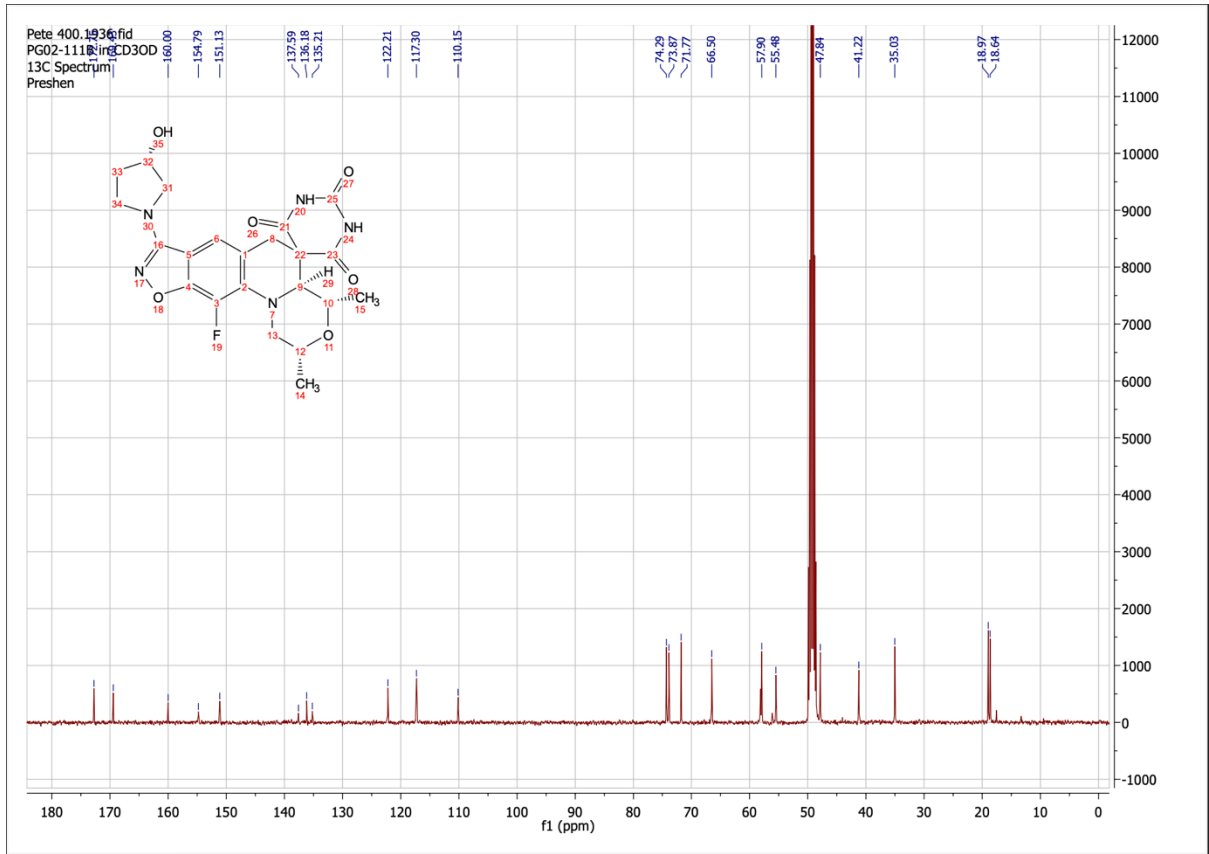





Sample Name: PG02-111B-P-NEG

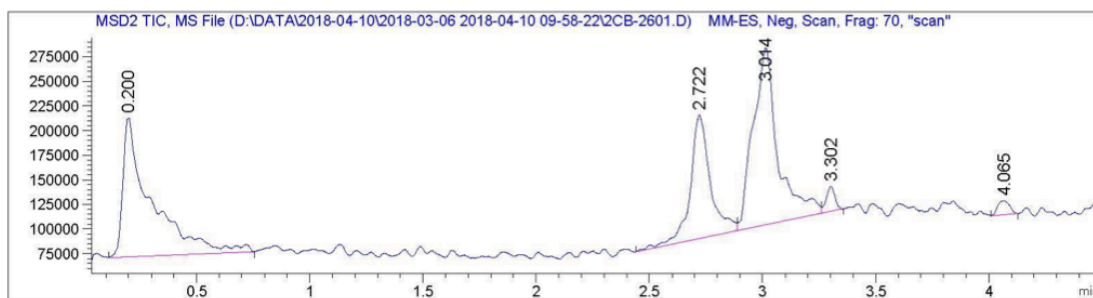

=====  
 Area Percent Report  
 =====

Sorted By : Signal  
 Multiplier : 1.0000  
 Dilution : 1.0000  
 Do not use Multiplier & Dilution Factor with ISTDs

Signal 1: DAD1 A, Sig=280,4 Ref=550,10

| Peak # | RetTime [min] | Type | Width [min] | Area [mAU*s] | Height [mAU] | Area %   |
|--------|---------------|------|-------------|--------------|--------------|----------|
| 1      | 0.144         | BBA  | 9.36e-3     | 15.03820     | 26.78102     | 0.2370   |
| 2      | 2.666         | BV   | 0.0414      | 57.61981     | 20.09909     | 0.9082   |
| 3      | 2.706         | VB   | 0.0320      | 22.58328     | 10.31470     | 0.3559   |
| 4      | 2.819         | BB   | 0.0249      | 3.84269      | 2.19624      | 0.0606   |
| 5      | 2.891         | BV   | 0.0190      | 271.91522    | 218.72090    | 4.2857   |
| 6      | 2.940         | VV   | 0.0276      | 5941.95898   | 3066.16211   | 93.6523  |
| 7      | 3.046         | VB   | 0.0223      | 8.99640      | 5.57408      | 0.1418   |
| 8      | 3.107         | BB   | 0.0240      | 9.67015      | 6.10827      | 0.1524   |
| 9      | 3.254         | BB   | 0.0206      | 7.44435      | 5.57200      | 0.1173   |
| 10     | 3.346         | VB   | 0.0245      | 1.26887      | 7.04945e-1   | 0.0200   |
| 11     | 3.643         | BB   | 0.0249      | 5.41191e-1   | 2.76090e-1   | 8.530e-3 |
| 12     | 3.952         | BV   | 0.0330      | 6.92319e-1   | 2.94173e-1   | 0.0109   |
| 13     | 4.431         | BB   | 0.0334      | 3.12759      | 1.38209      | 0.0493   |

Totals : 6344.69907 3364.18572

Signal 2: DAD1 B, Sig=254,4 Ref=550,10

| Peak # | RetTime [min] | Type | Width [min] | Area [mAU*s] | Height [mAU] | Area %  |
|--------|---------------|------|-------------|--------------|--------------|---------|
| 1      | 2.891         | BV   | 0.0190      | 291.51050    | 233.80136    | 4.6547  |
| 2      | 2.939         | VV   | 0.0308      | 5971.25537   | 3055.35205   | 95.3453 |

Totals : 6262.76587 3289.15341

MS Spectrum

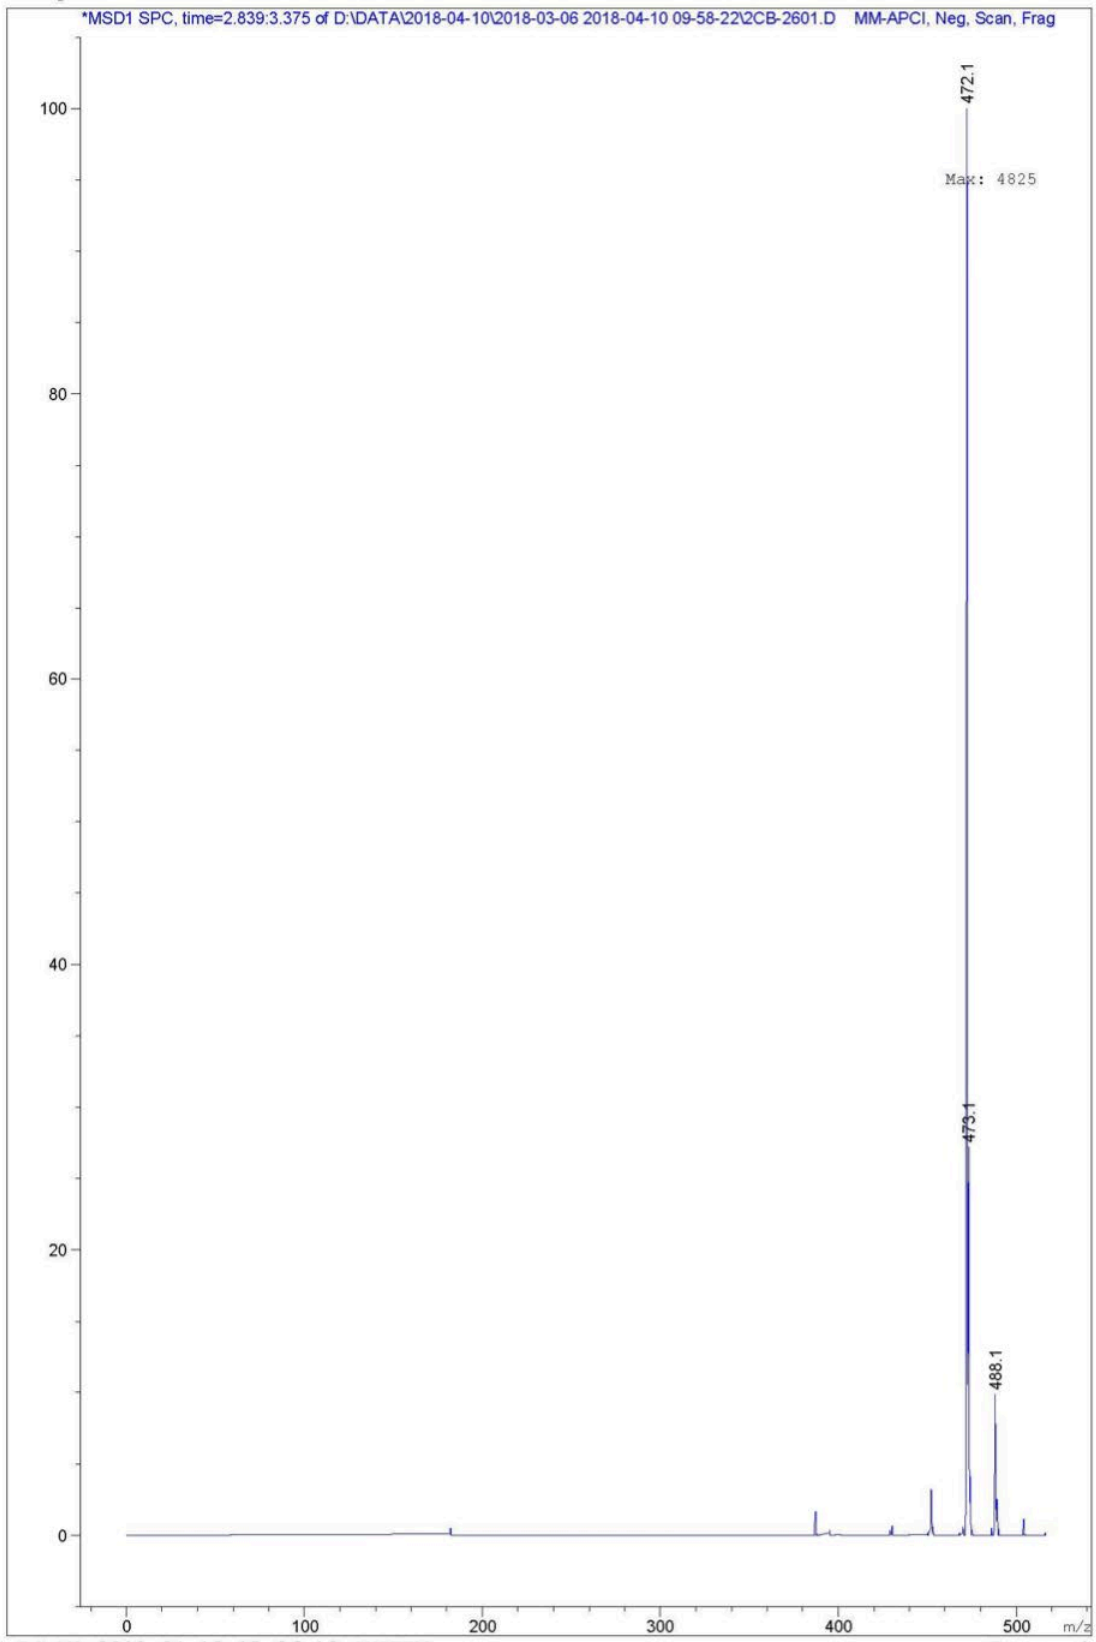

# Compound 9

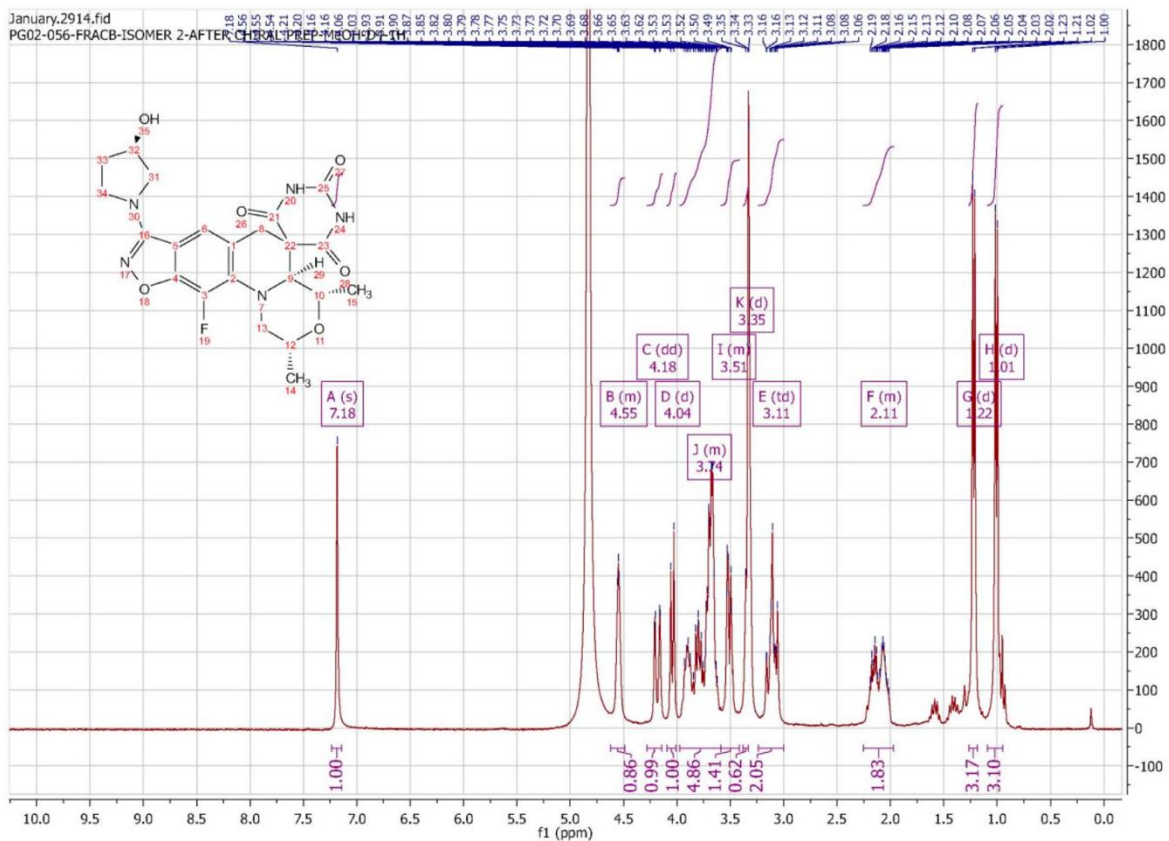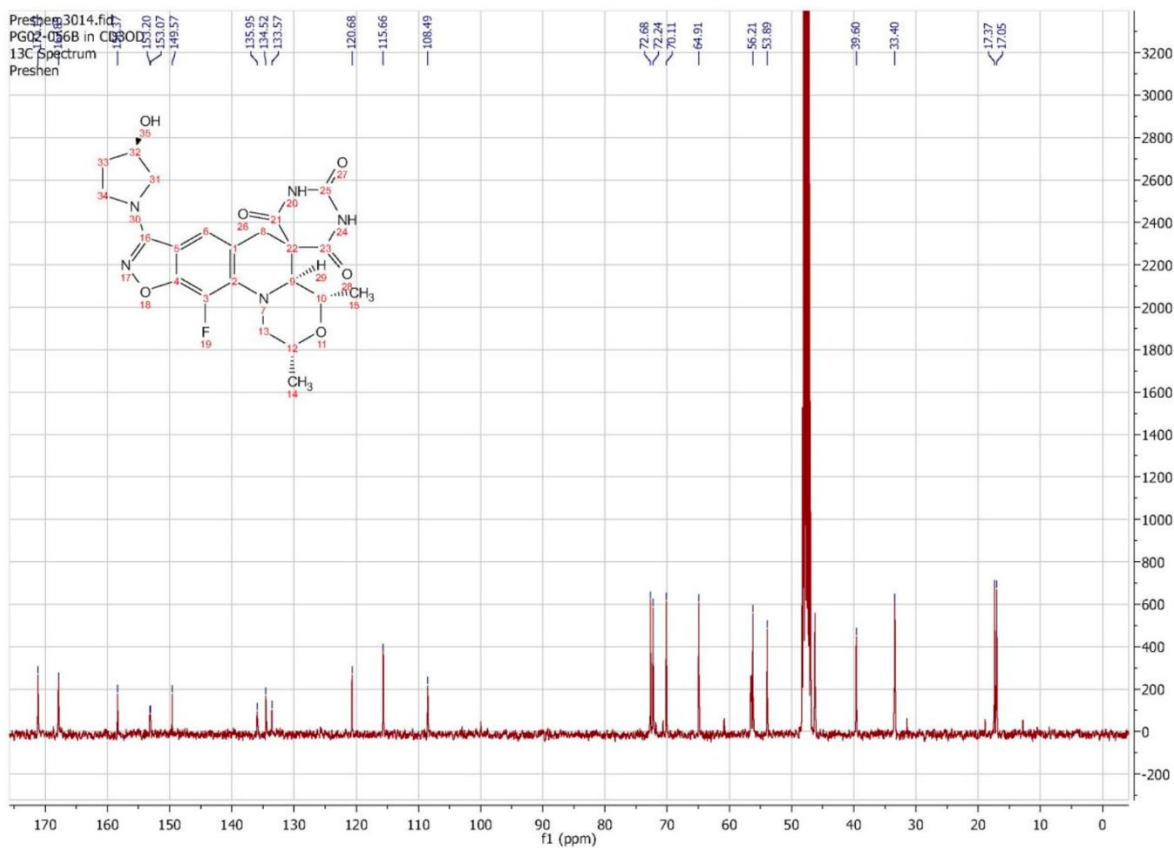

Data File D:\LCMS data\2018-01-29\H3D 2018-01-29 2018-01-29 09-54-10\1DD-0401--005.D  
Sample Name: PG02-056-FRAC B-ISOMER 2-NEG

```
=====
Acq. Operator   : SYSTEM                      Seq. Line :    5
Acq. Instrument : Calimero                   Location  : P1-D4
Injection Date  : 2018-01-29 10:09:52       Inj       :    1
                                                Inj Volume: 1.000 µl
Method          : D:\LCMS data\2018-01-29\H3D 2018-01-29 2018-01-29 09-54-10\NEW GENERAL NEG.
                                                M (Sequence Method)
Last changed    : 2018-01-29 09:54:10 by SYSTEM
Method Info     : Standard 2.2min method with 254nm, 280nm and 290nm and positive ESI mode
                                                100-800m/z
=====
```

Additional Info : Peak(s) manually integrated

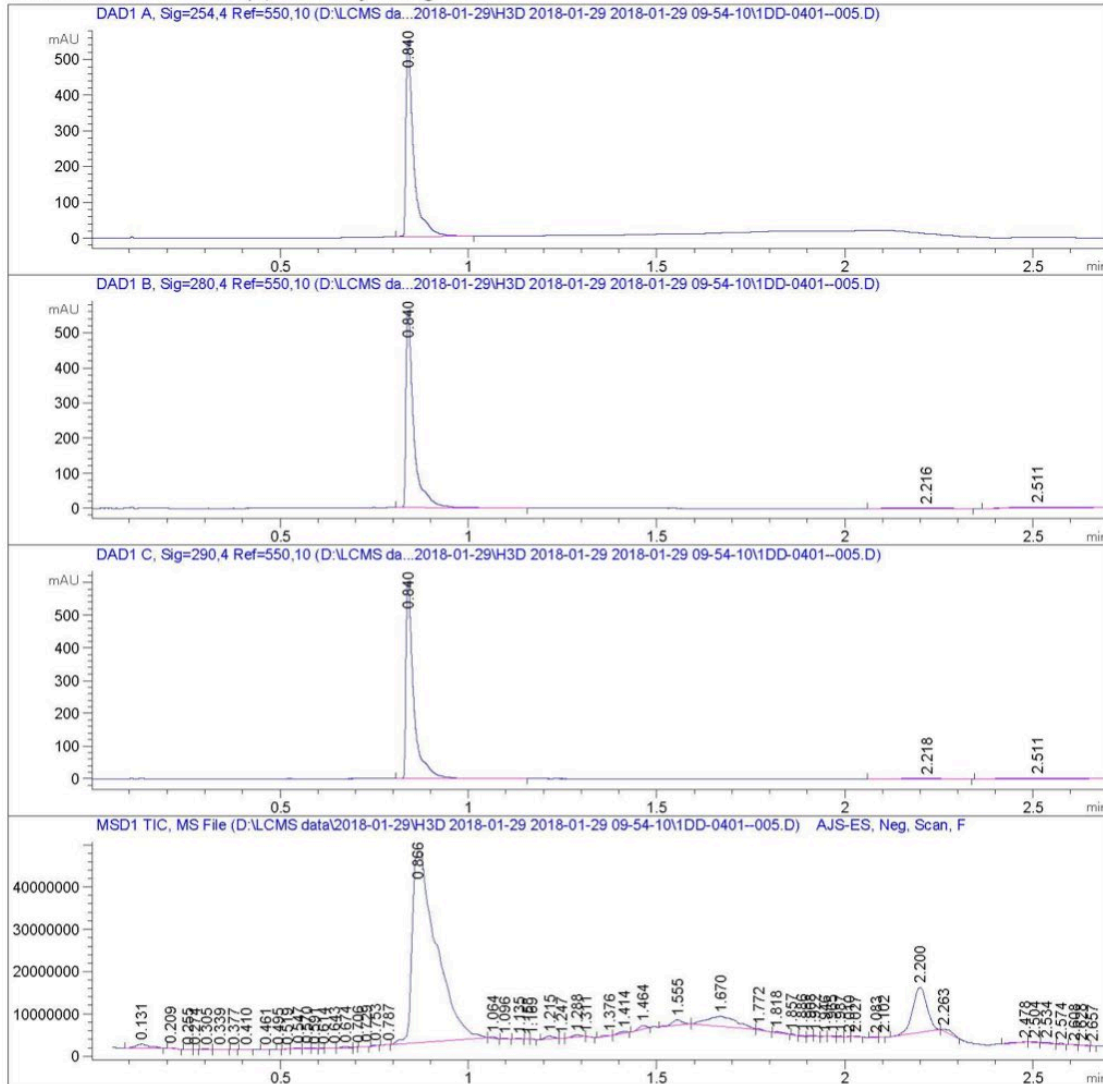

=====  
Area Percent Report  
=====

Sorted By : Signal  
Multiplier : 1.0000  
Dilution : 1.0000  
Do not use Multiplier & Dilution Factor with ISTDs

Signal 1: DAD1 A, Sig=254,4 Ref=550,10

| Peak # | RetTime [min] | Type | Width [min] | Area [mAU*s] | Height [mAU] | Area %   |
|--------|---------------|------|-------------|--------------|--------------|----------|
| 1      | 0.840         | BB   | 0.0205      | 775.94153    | 550.12347    | 100.0000 |

Totals : 775.94153 550.12347

Signal 2: DAD1 B, Sig=280,4 Ref=550,10

| Peak # | RetTime [min] | Type | Width [min] | Area [mAU*s] | Height [mAU] | Area %  |
|--------|---------------|------|-------------|--------------|--------------|---------|
| 1      | 0.840         | BB   | 0.0206      | 799.66559    | 563.26569    | 95.3843 |
| 2      | 2.216         | BB   | 0.1030      | 12.20876     | 1.42479      | 1.4563  |
| 3      | 2.511         | BBA  | 0.1278      | 26.48782     | 2.46693      | 3.1595  |

Totals : 838.36217 567.15740

Signal 3: DAD1 C, Sig=290,4 Ref=550,10

| Peak # | RetTime [min] | Type | Width [min] | Area [mAU*s] | Height [mAU] | Area %  |
|--------|---------------|------|-------------|--------------|--------------|---------|
| 1      | 0.840         | BB   | 0.0206      | 856.92084    | 603.89893    | 95.9354 |
| 2      | 2.218         | BB   | 0.0927      | 8.85336      | 1.13941      | 0.9912  |
| 3      | 2.511         | BBA  | 0.1315      | 27.45303     | 2.52197      | 3.0735  |

Totals : 893.22723 607.56031

Signal 4: MSD1 TIC, MS File

| Peak # | RetTime [min] | Type | Width [min] | Area      | Height    | Area %   |
|--------|---------------|------|-------------|-----------|-----------|----------|
| 1      | 0.131         | BB   | 0.0338      | 2.41111e6 | 9.71374e5 | 0.9345   |
| 2      | 0.209         | BB   | 0.0224      | 1.42856e5 | 1.04632e5 | 0.0554   |
| 3      | 0.255         | BB   | 0.0116      | 4.24931e4 | 6.10307e4 | 0.0165   |
| 4      | 0.274         | BB   | 7.47e-3     | 1.22918e4 | 2.74250e4 | 4.764e-3 |
| 5      | 0.305         | BB   | 0.0188      | 2.05701e5 | 1.94512e5 | 0.0797   |

MS Spectrum

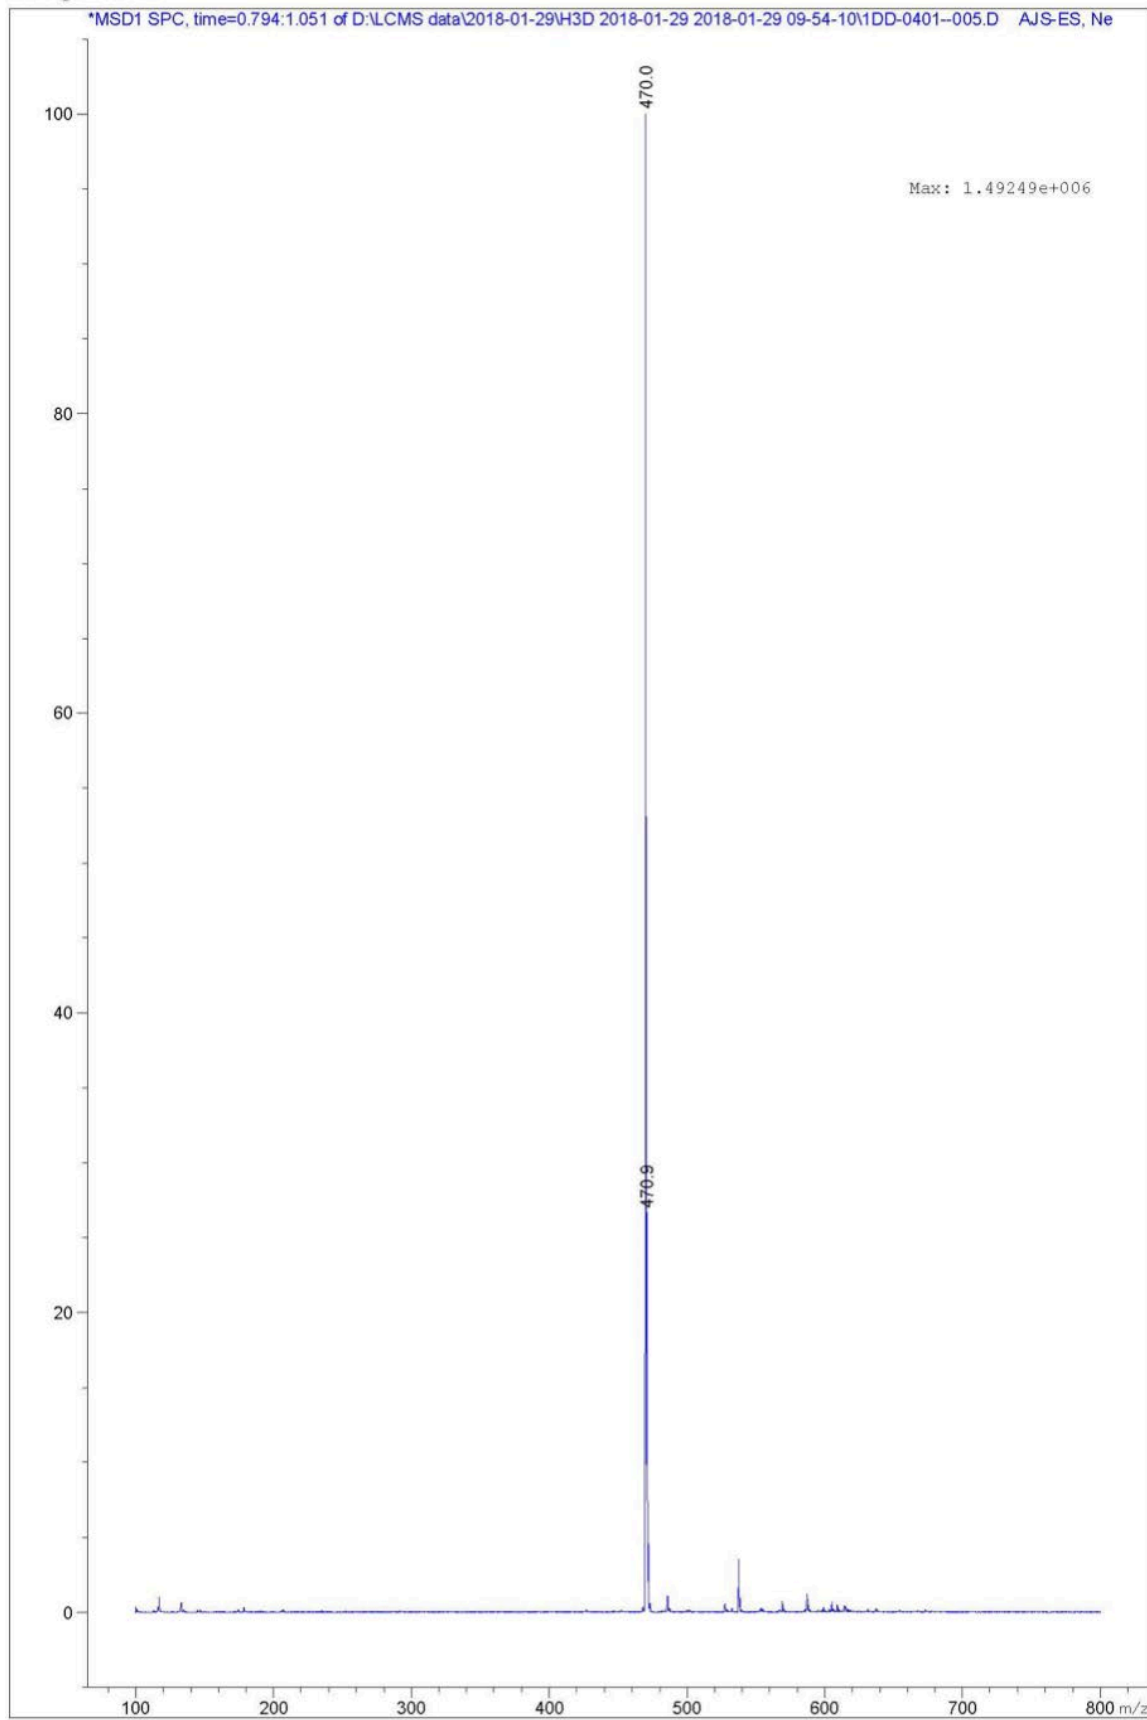

# Compound 10

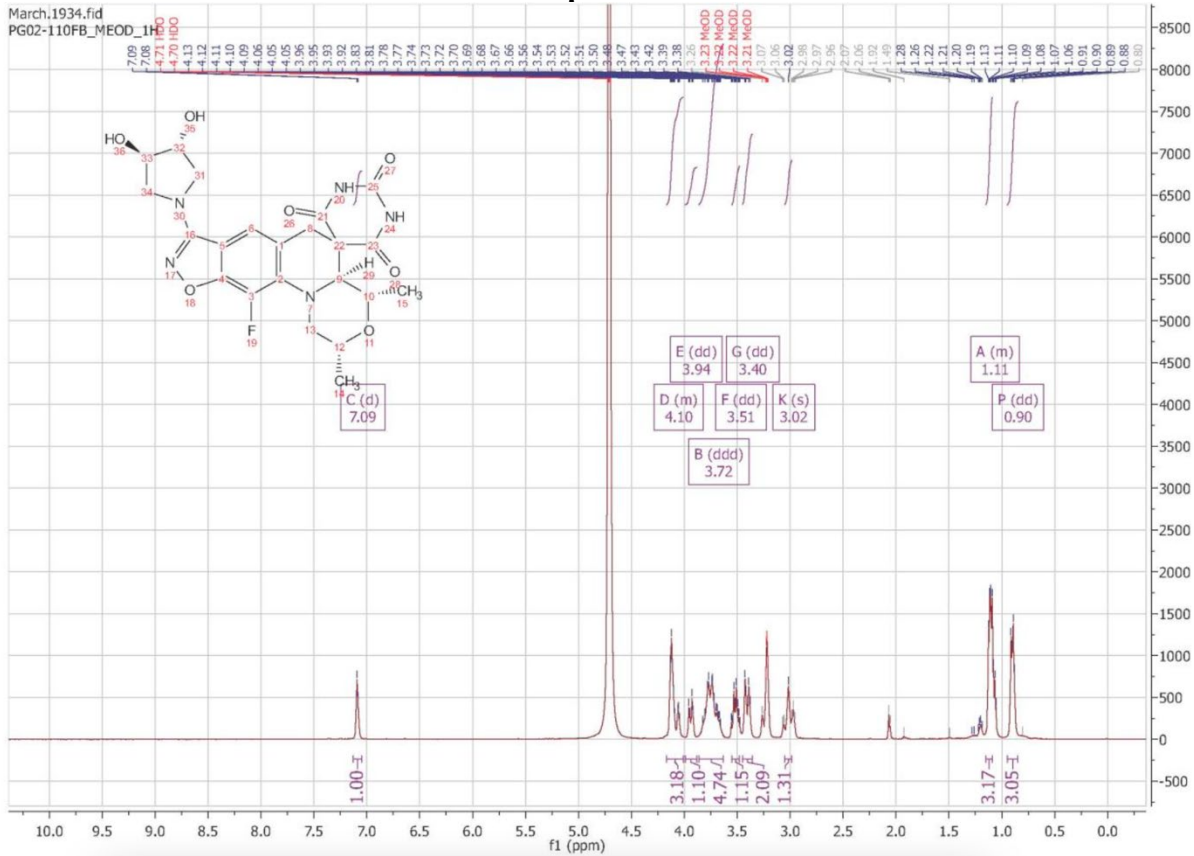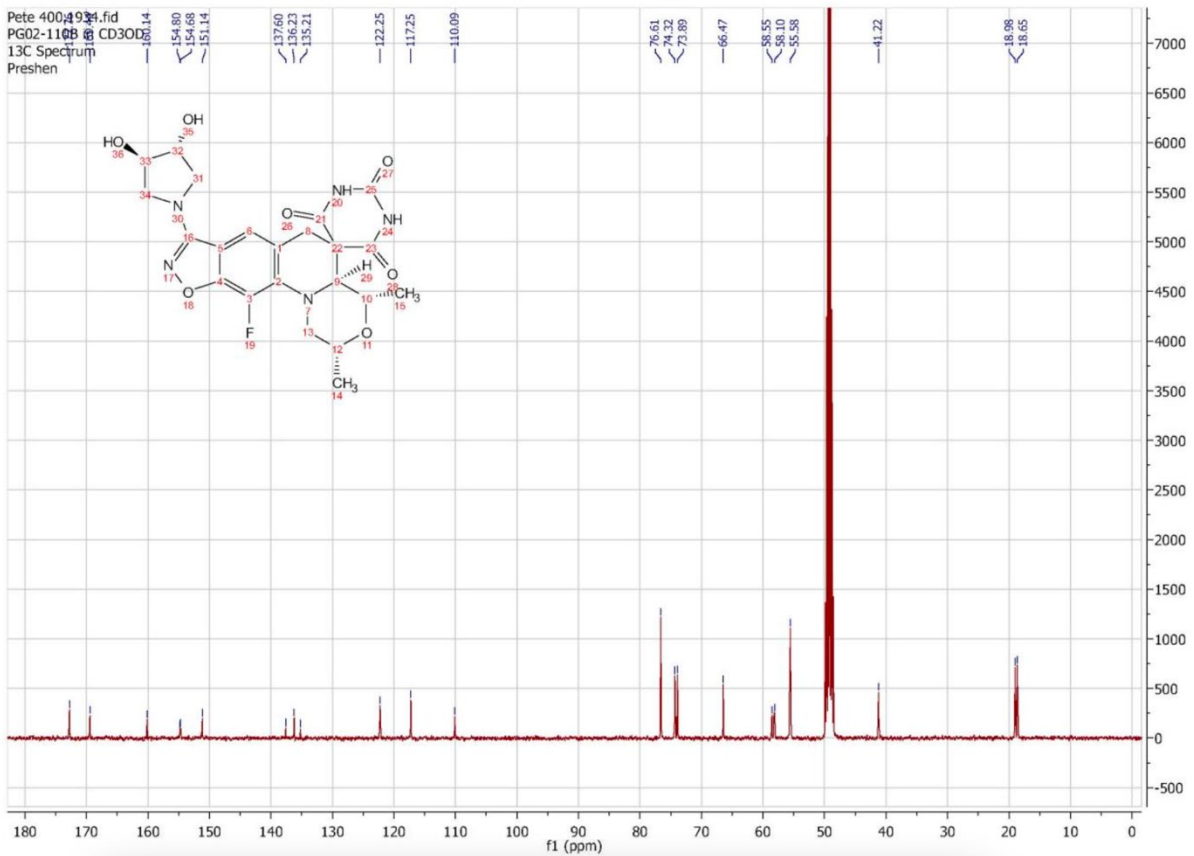

```

=====
Acq. Operator   : SYSTEM                               Seq. Line :   19
Acq. Instrument : Agilent LC-MS                       Location  : P2-E-05
Injection Date  : 2018-04-10 14:56:19                 Inj       :    1
                                                    Inj Volume: 2.000 µl

Method          : D:\DATA\2018-04-10\2018-03-06 2018-04-10 12-54-30\GENERAL METHOD NEG 1.M (
                Sequence Method)
Last changed    : 2018-04-10 12:54:30 by SYSTEM
Additional Info  : Peak(s) manually integrated
  
```

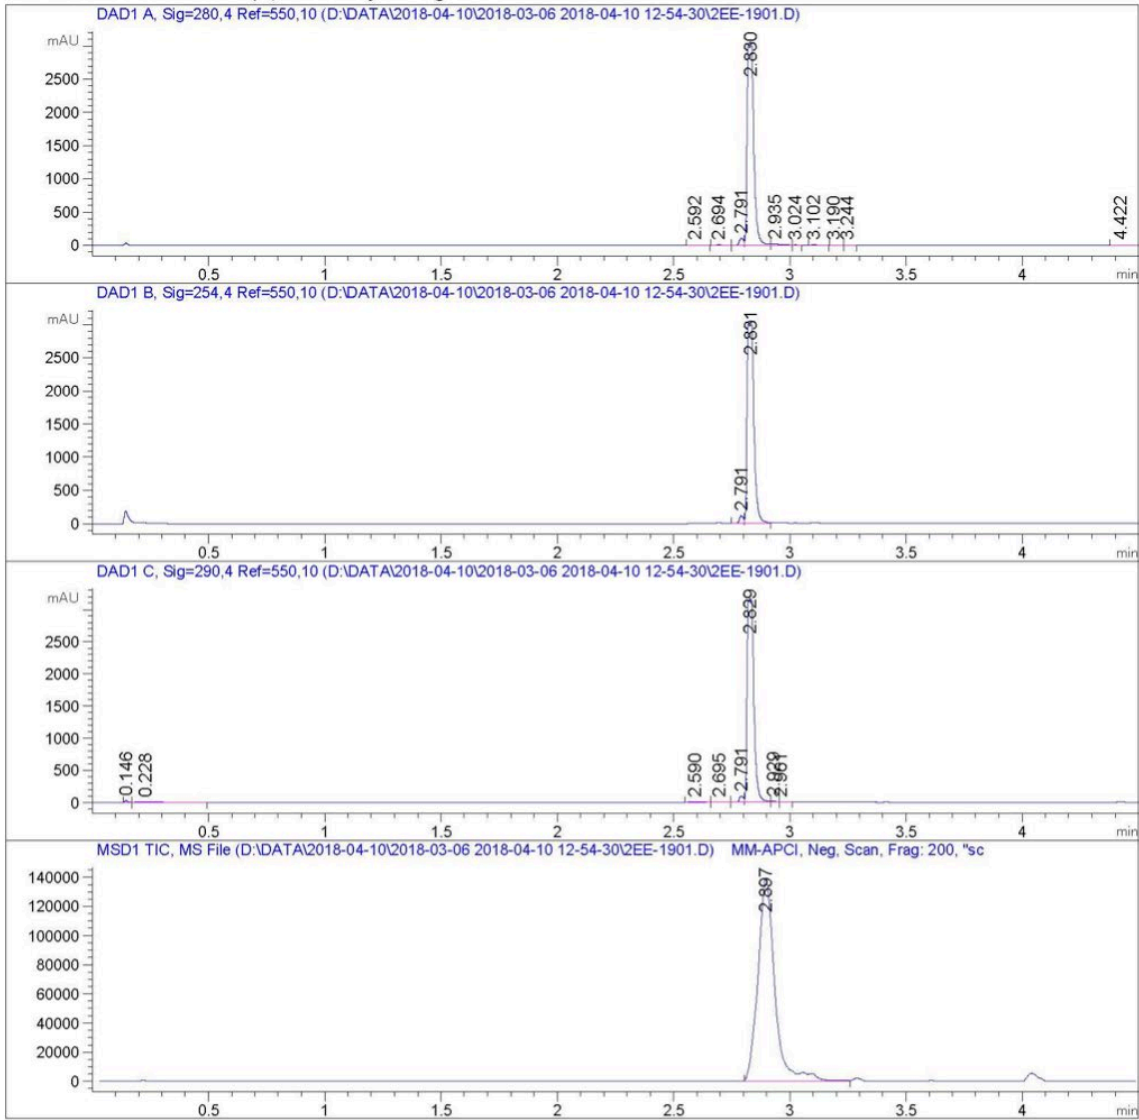



=====  
 Area Percent Report  
 =====

Sorted By : Signal  
 Multiplier : 1.0000  
 Dilution : 1.0000  
 Do not use Multiplier & Dilution Factor with ISTDs

Signal 1: DAD1 A, Sig=280,4 Ref=550,10

| Peak # | RetTime [min] | Type | Width [min] | Area [mAU*s] | Height [mAU] | Area %  |
|--------|---------------|------|-------------|--------------|--------------|---------|
| 1      | 2.592         | BB   | 0.0442      | 7.71034      | 2.55734      | 0.1251  |
| 2      | 2.694         | BB   | 0.0330      | 11.65389     | 4.95118      | 0.1890  |
| 3      | 2.791         | BV   | 0.0185      | 119.53217    | 103.22375    | 1.9390  |
| 4      | 2.830         | VV   | 0.0268      | 5967.81104   | 3058.96167   | 96.8063 |
| 5      | 2.935         | VB   | 0.0378      | 35.91277     | 13.62303     | 0.5826  |
| 6      | 3.024         | BB   | 0.0173      | 1.76414      | 1.54401      | 0.0286  |
| 7      | 3.102         | BB   | 0.0267      | 12.23887     | 6.72609      | 0.1985  |
| 8      | 3.190         | BV   | 0.0355      | 2.43541      | 9.15747e-1   | 0.0395  |
| 9      | 3.244         | VB   | 0.0255      | 2.25943      | 1.28436      | 0.0367  |
| 10     | 4.422         | BBA  | 0.0337      | 3.37610      | 1.39767      | 0.0548  |

Totals : 6164.69415 3195.18484

Signal 2: DAD1 B, Sig=254,4 Ref=550,10

| Peak # | RetTime [min] | Type | Width [min] | Area [mAU*s] | Height [mAU] | Area %  |
|--------|---------------|------|-------------|--------------|--------------|---------|
| 1      | 2.791         | BV   | 0.0180      | 129.99344    | 111.93073    | 2.0789  |
| 2      | 2.831         | VV   | 0.0279      | 6122.91748   | 3054.69824   | 97.9211 |

Totals : 6252.91092 3166.62897

MS Spectrum

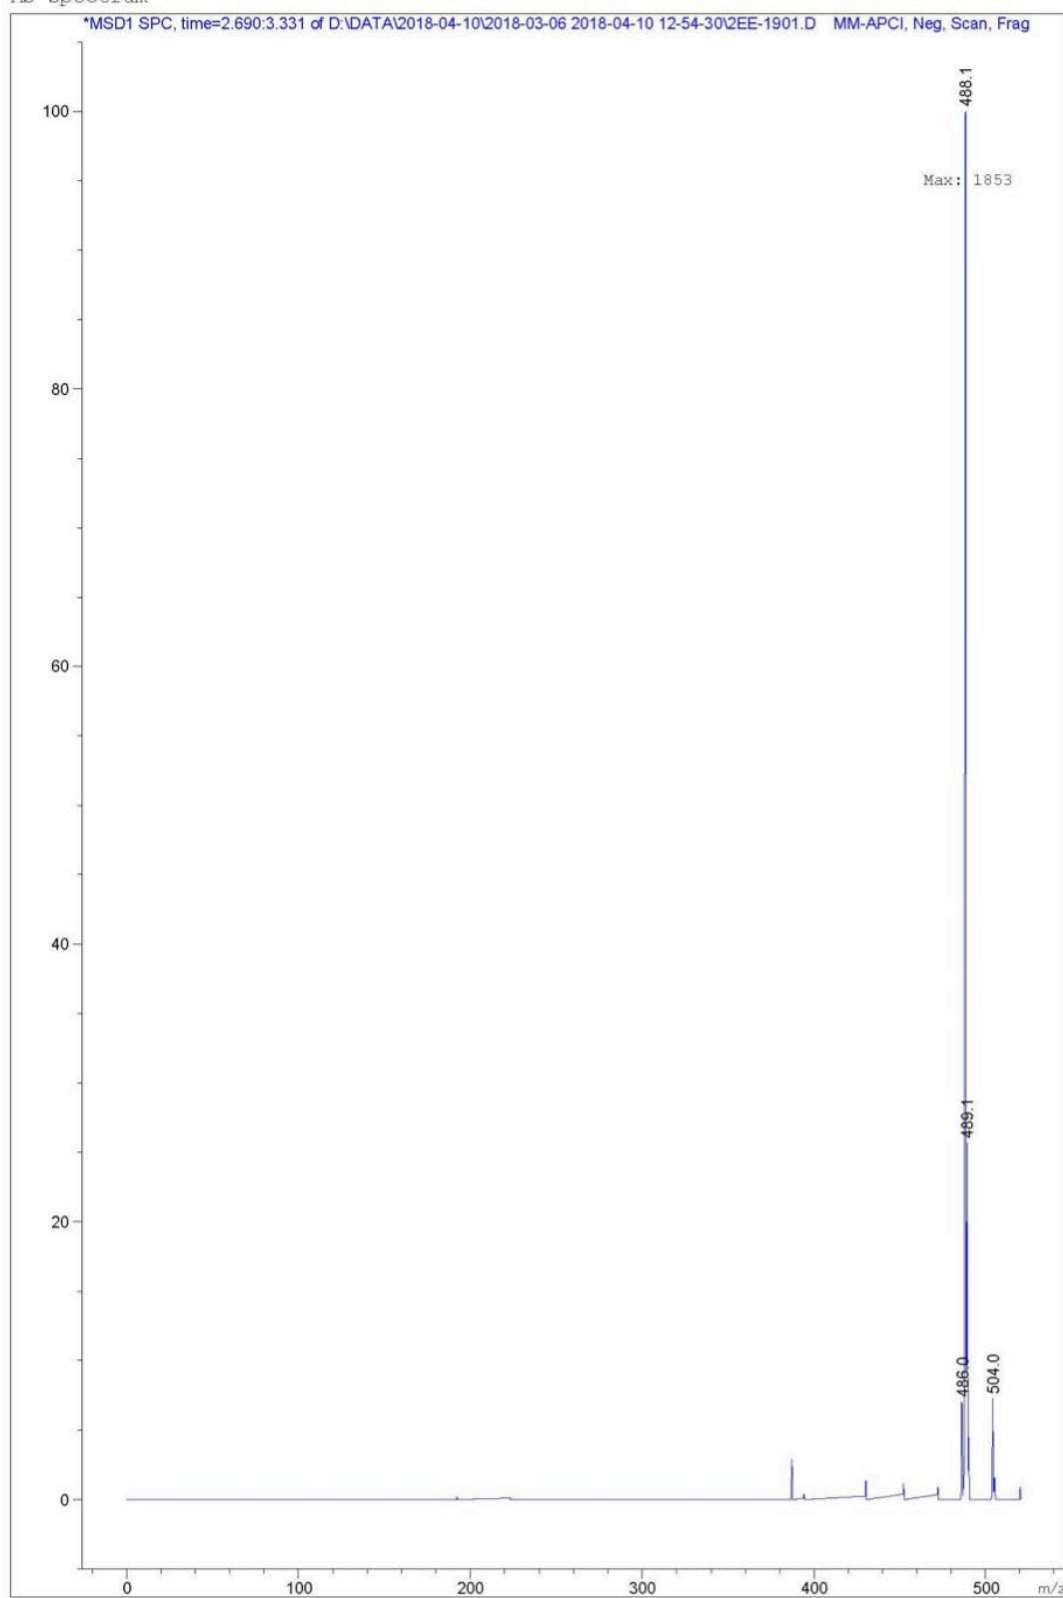

lient LC-MS 2018-04-10 16:11:07 SYSTEM

Page 1 of 1

### Compound 18

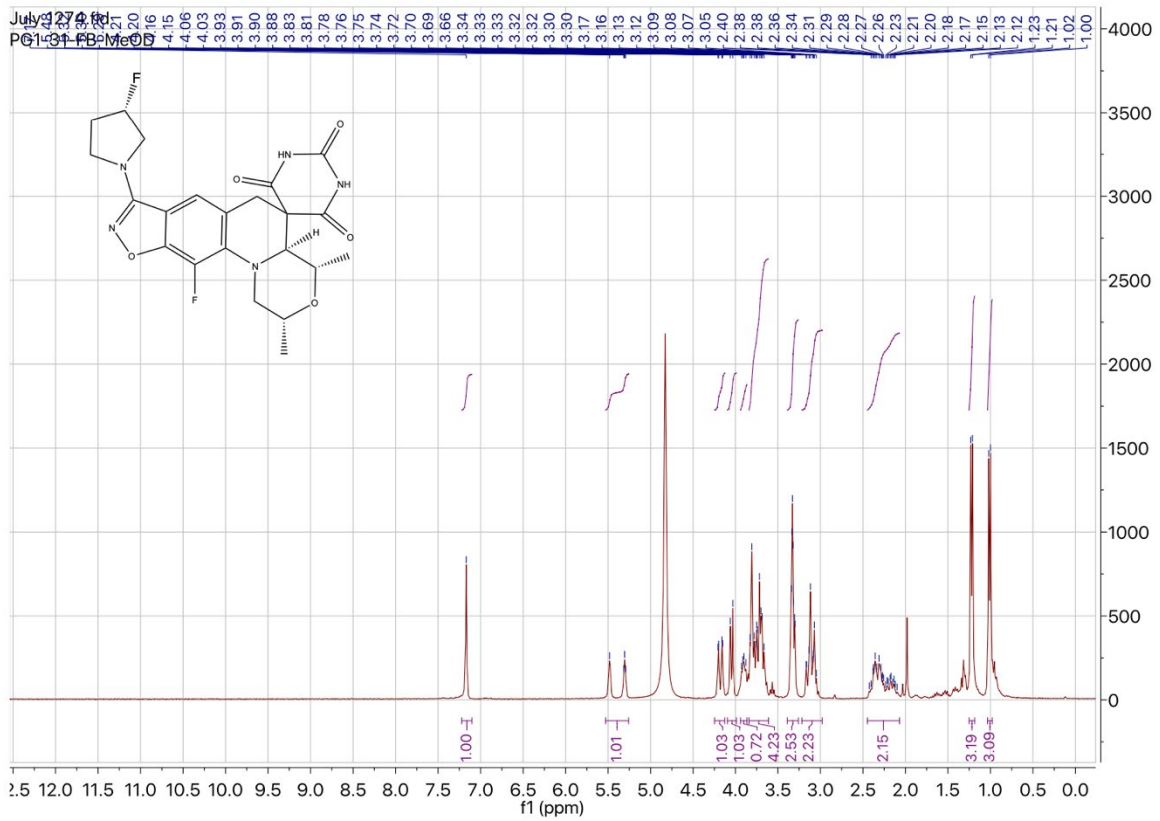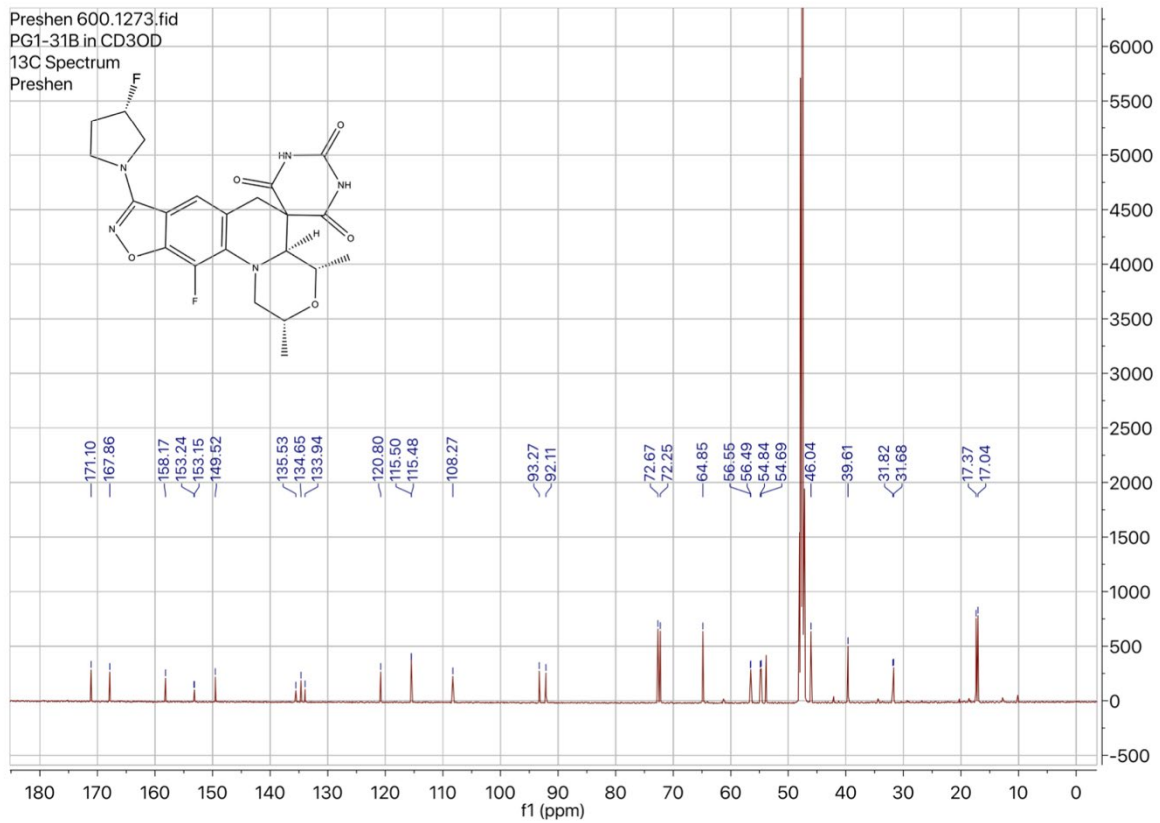

=====  
 Area Percent Report  
 =====

Sorted By : Signal  
 Multiplier : 1.0000  
 Dilution : 1.0000  
 Do not use Multiplier & Dilution Factor with ISTDs

Signal 1: DAD1 A, Sig=254,4 Ref=550,10

| Peak # | RetTime [min] | Type | Width [min] | Area [mAU*s] | Height [mAU] | Area %   |
|--------|---------------|------|-------------|--------------|--------------|----------|
| 1      | 0.959         | BB   | 0.0159      | 363.88965    | 330.04791    | 100.0000 |

Totals : 363.88965 330.04791

Signal 2: DAD1 B, Sig=280,4 Ref=550,10

| Peak # | RetTime [min] | Type | Width [min] | Area [mAU*s] | Height [mAU] | Area %   |
|--------|---------------|------|-------------|--------------|--------------|----------|
| 1      | 0.959         | BB   | 0.0159      | 341.24991    | 309.40317    | 100.0000 |

Totals : 341.24991 309.40317

Signal 3: DAD1 C, Sig=290,4 Ref=550,10

| Peak # | RetTime [min] | Type | Width [min] | Area [mAU*s] | Height [mAU] | Area %   |
|--------|---------------|------|-------------|--------------|--------------|----------|
| 1      | 0.959         | BB   | 0.0159      | 376.94943    | 341.80887    | 100.0000 |

Totals : 376.94943 341.80887

```

=====
Acq. Operator   : SYSTEM                               Seq. Line :    2
Acq. Instrument : Calimero                             Location  : P2-A4
Injection Date  : 2018-07-09 16:59:17                 Inj       :    1
                                                    Inj Volume: 1.000 µl
Method          : D:\LCMS data\2018-07-09\H3D 2018-07-09 2018-07-09 16-54-19\NEW GENERAL NEG.
                  M (Sequence Method)
Last changed    : 2018-07-09 16:54:19 by SYSTEM
Method Info     : Standard 2.2min method with 254nm, 280nm and 290nm and positive ESI mode
                  100-800m/z
  
```

Additional Info : Peak(s) manually integrated

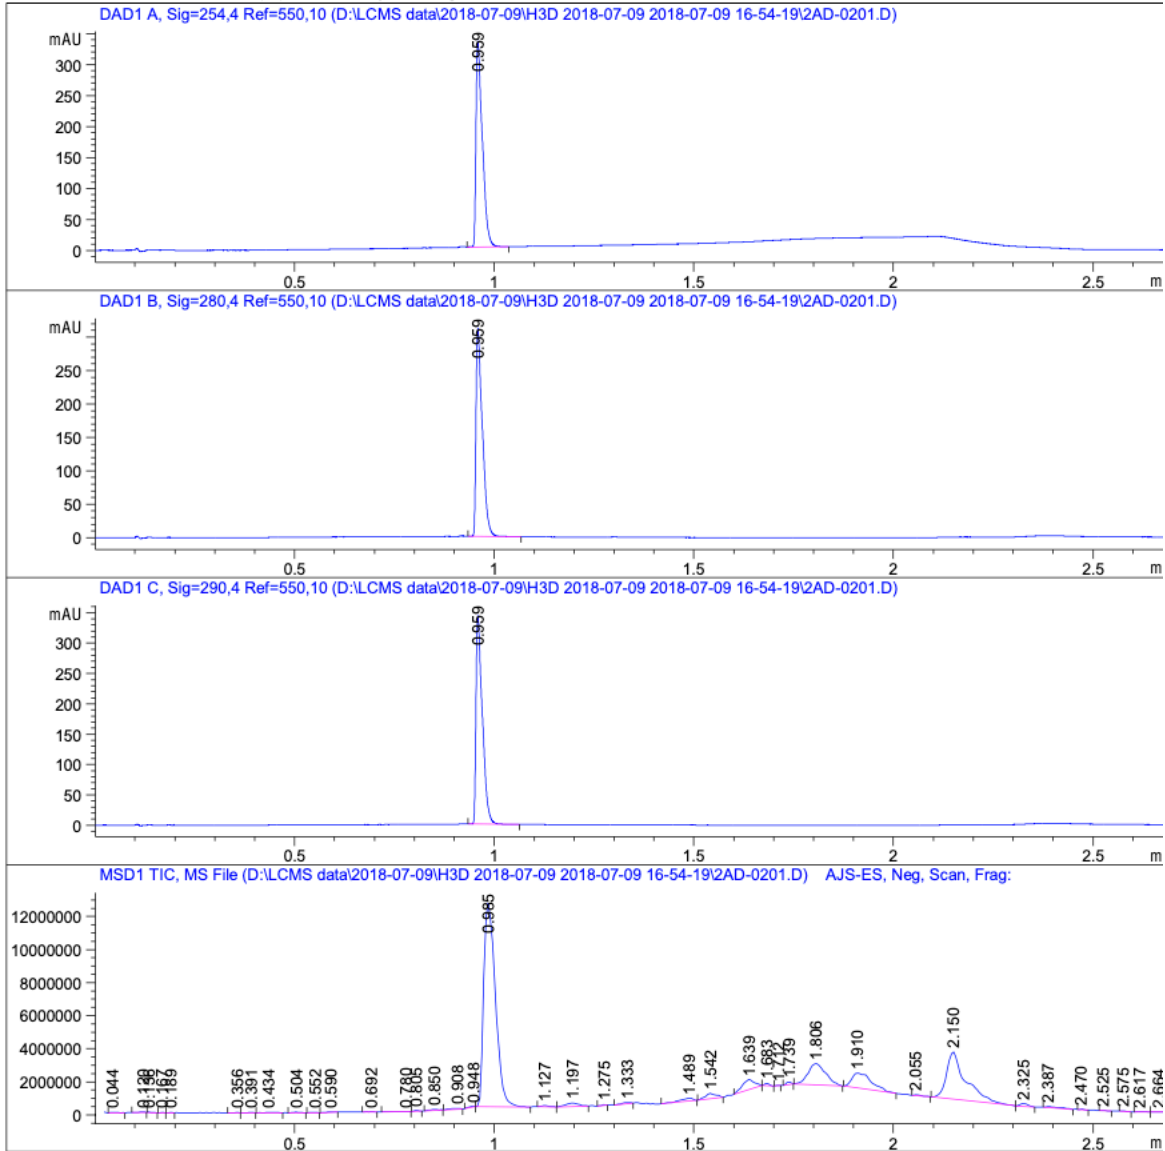

MS Spectrum

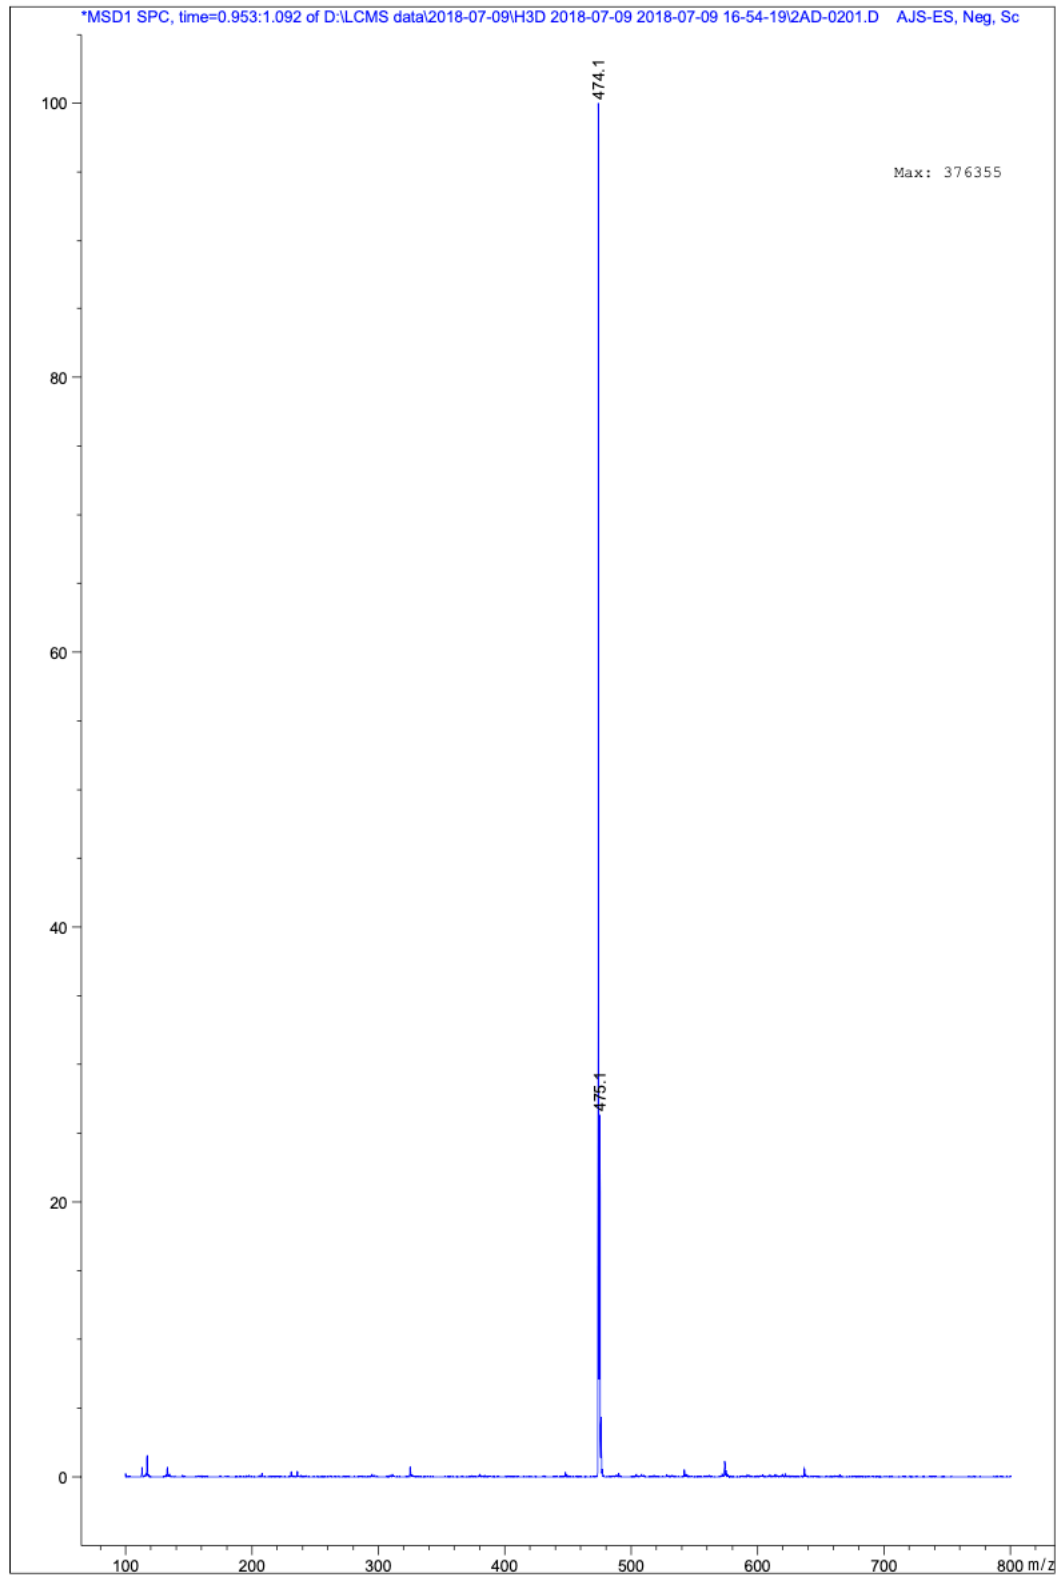

**Compound 19**

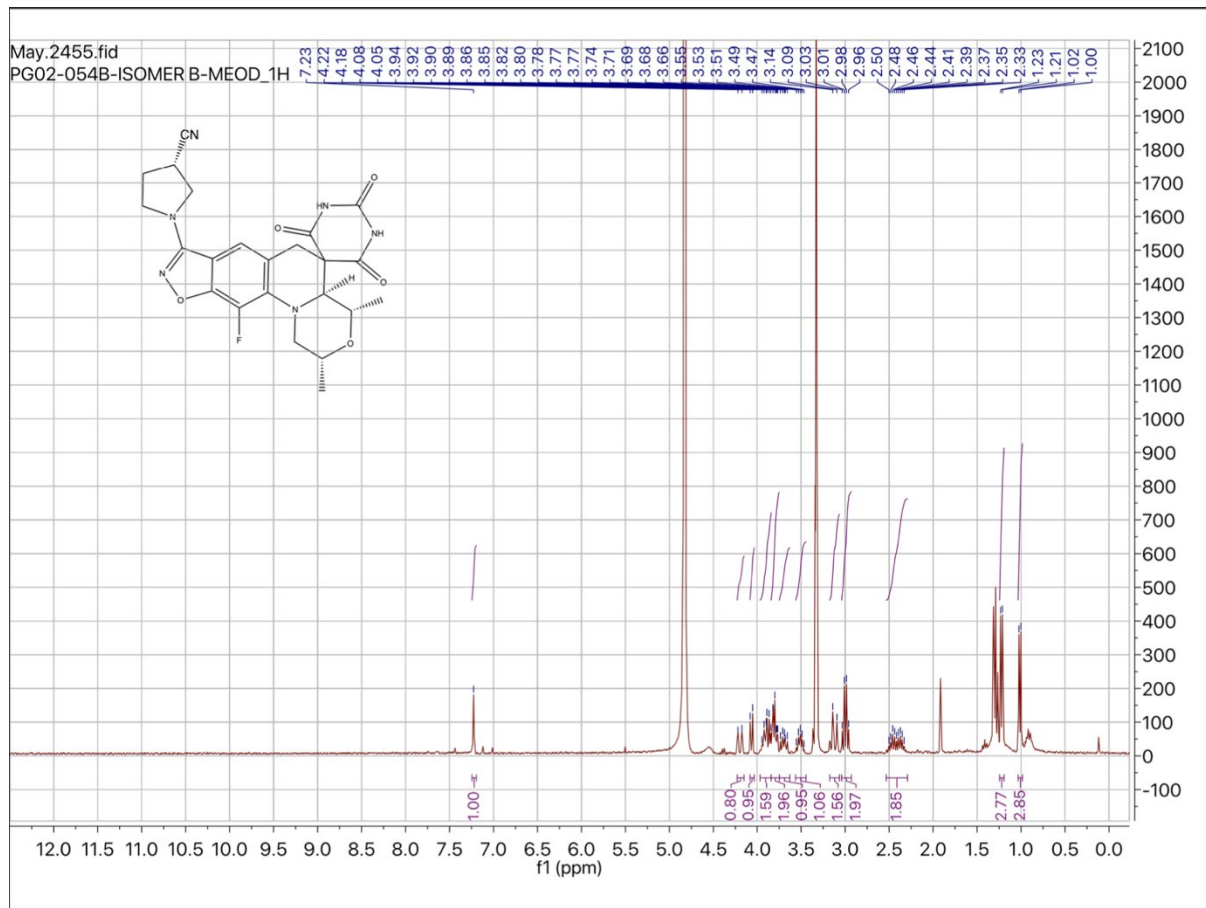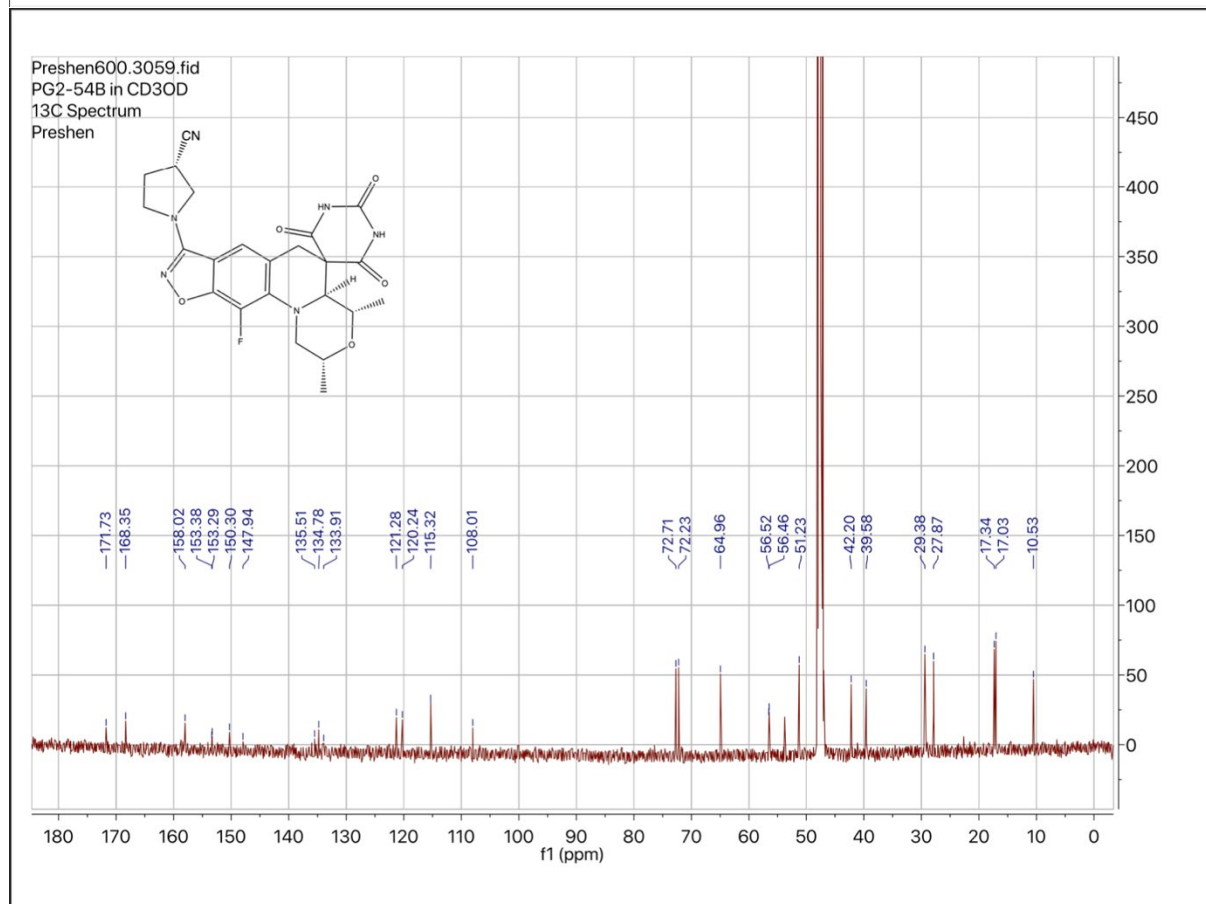





=====  
 Area Percent Report  
 =====

Sorted By : Signal  
 Multiplier : 1.0000  
 Dilution : 1.0000  
 Do not use Multiplier & Dilution Factor with ISTDs

Signal 1: DAD1 A, Sig=280,4 Ref=550,10

| Peak # | RetTime [min] | Type | Width [min] | Area [mAU*s] | Height [mAU] | Area %  |
|--------|---------------|------|-------------|--------------|--------------|---------|
| 1      | 2.706         | BV   | 0.0214      | 75.06808     | 53.25735     | 4.2451  |
| 2      | 2.764         | VV   | 0.0153      | 1693.27087   | 1671.98340   | 95.7549 |

Totals : 1768.33896 1725.24075

Signal 2: DAD1 B, Sig=254,4 Ref=550,10

| Peak # | RetTime [min] | Type | Width [min] | Area [mAU*s] | Height [mAU] | Area %   |
|--------|---------------|------|-------------|--------------|--------------|----------|
| 1      | 2.764         | VV   | 0.0153      | 2003.82214   | 1949.48669   | 100.0000 |

Totals : 2003.82214 1949.48669

Signal 3: DAD1 C, Sig=290,4 Ref=550,10

| Peak # | RetTime [min] | Type | Width [min] | Area [mAU*s] | Height [mAU] | Area %   |
|--------|---------------|------|-------------|--------------|--------------|----------|
| 1      | 2.764         | VV   | 0.0153      | 1938.09338   | 1910.02649   | 100.0000 |

Totals : 1938.09338 1910.02649

MS Spectrum

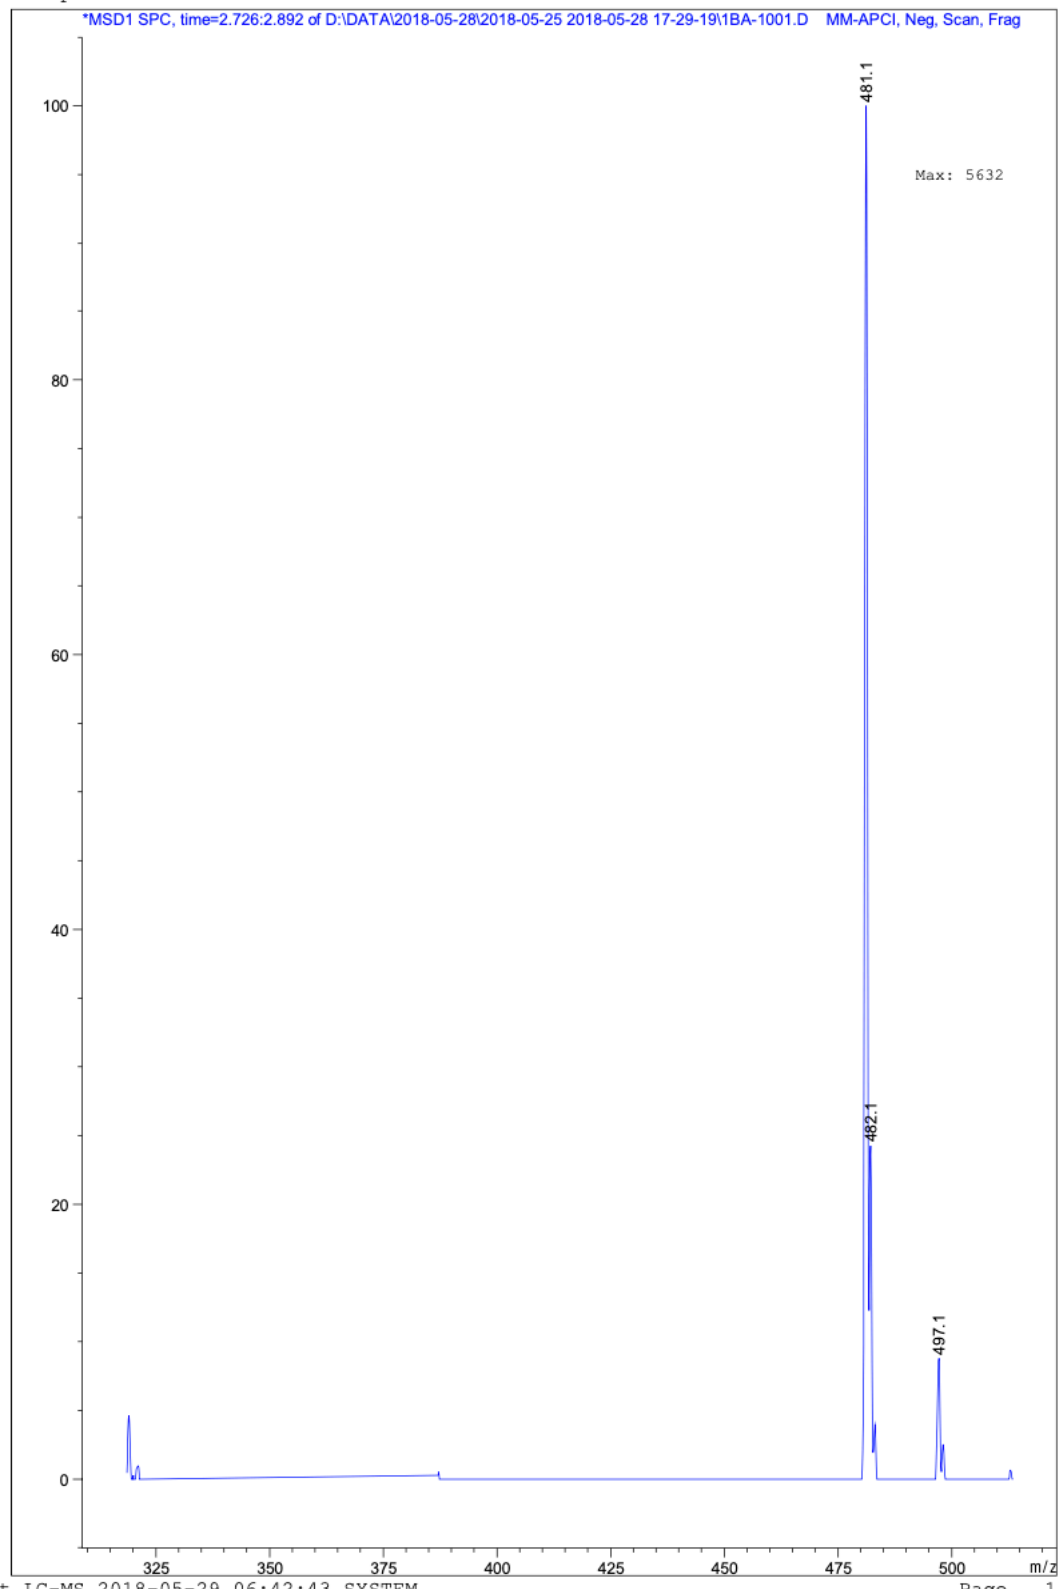

# Compound 23

August  
PG1-45B-stored\_DMSO\_1H

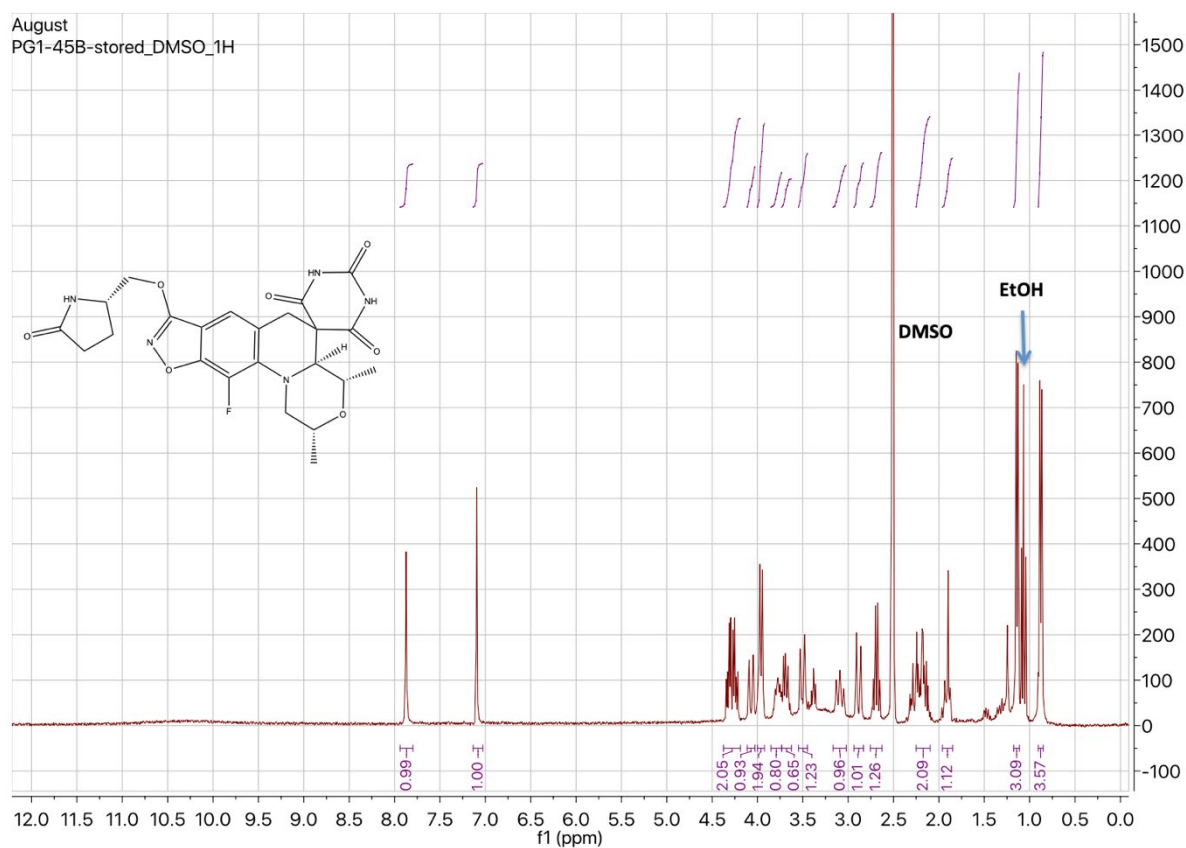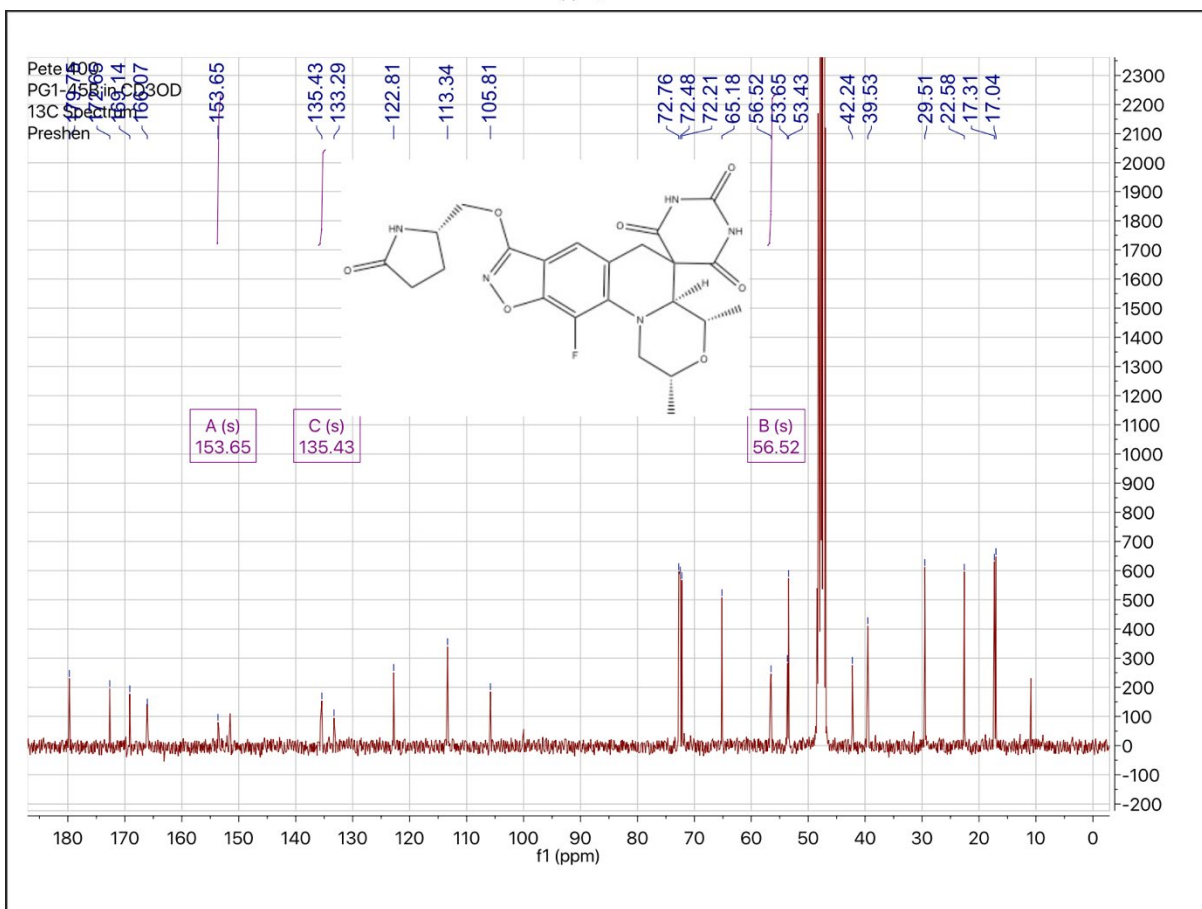

```

=====
Acq. Operator   : SYSTEM                               Seq. Line :    5
Acq. Instrument : Calimero                             Location  : P1-D3
Injection Date  : 2018-07-26 12:17:49                 Inj       :    1
                                                    Inj Volume: 1.000 µl
Method         : D:\LCMS data\2018-07-26\H3D 2018-07-26 2018-07-26 12-02-27\NEW GENERAL NEG.
                M (Sequence Method)
Last changed   : 2018-07-26 12:08:58 by SYSTEM
Method Info    : Standard 2.2min method with 254nm, 280nm and 290nm and positive ESI mode
                100-800m/z
  
```

Additional Info : Peak(s) manually integrated

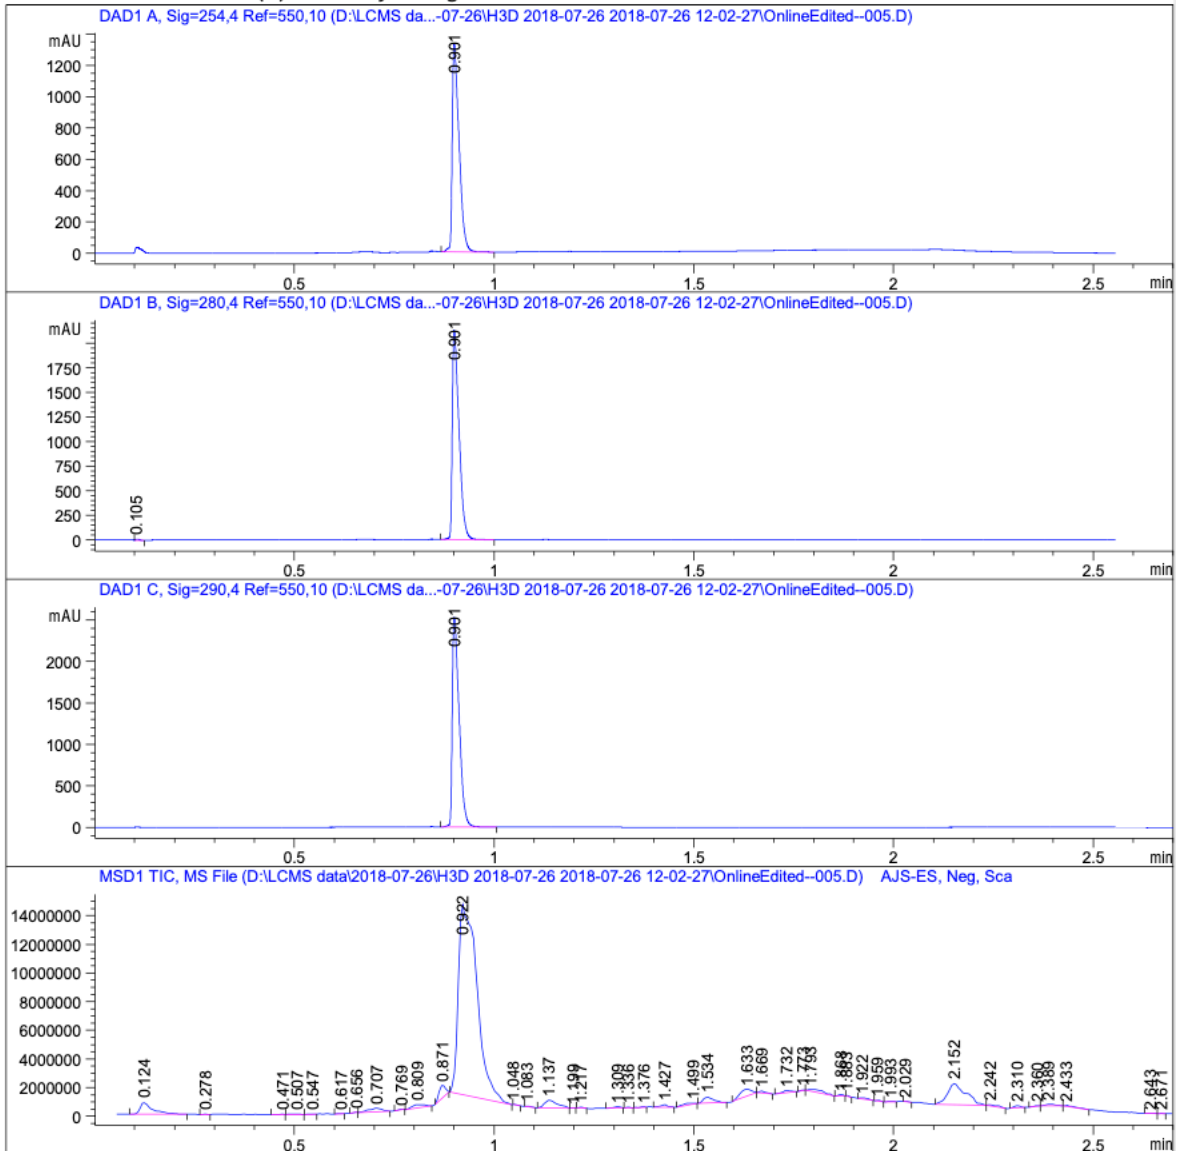

=====  
 Area Percent Report  
 =====

Sorted By : Signal  
 Multiplier : 1.0000  
 Dilution : 1.0000  
 Do not use Multiplier & Dilution Factor with ISTDs

Signal 1: DAD1 A, Sig=254,4 Ref=550,10

| Peak # | RetTime [min] | Type | Width [min] | Area [mAU*s] | Height [mAU] | Area %   |
|--------|---------------|------|-------------|--------------|--------------|----------|
| 1      | 0.901         | BB   | 0.0168      | 1564.61304   | 1322.85315   | 100.0000 |

Totals : 1564.61304 1322.85315

Signal 2: DAD1 B, Sig=280,4 Ref=550,10

| Peak # | RetTime [min] | Type | Width [min] | Area [mAU*s] | Height [mAU] | Area %  |
|--------|---------------|------|-------------|--------------|--------------|---------|
| 1      | 0.105         | BB   | 0.0114      | 7.28625      | 10.08357     | 0.2964  |
| 2      | 0.901         | BB   | 0.0166      | 2450.61865   | 2107.68970   | 99.7036 |

Totals : 2457.90490 2117.77327

Signal 3: DAD1 C, Sig=290,4 Ref=550,10

| Peak # | RetTime [min] | Type | Width [min] | Area [mAU*s] | Height [mAU] | Area %   |
|--------|---------------|------|-------------|--------------|--------------|----------|
| 1      | 0.901         | BB   | 0.0173      | 2972.51392   | 2512.81714   | 100.0000 |

Totals : 2972.51392 2512.81714

MS Spectrum

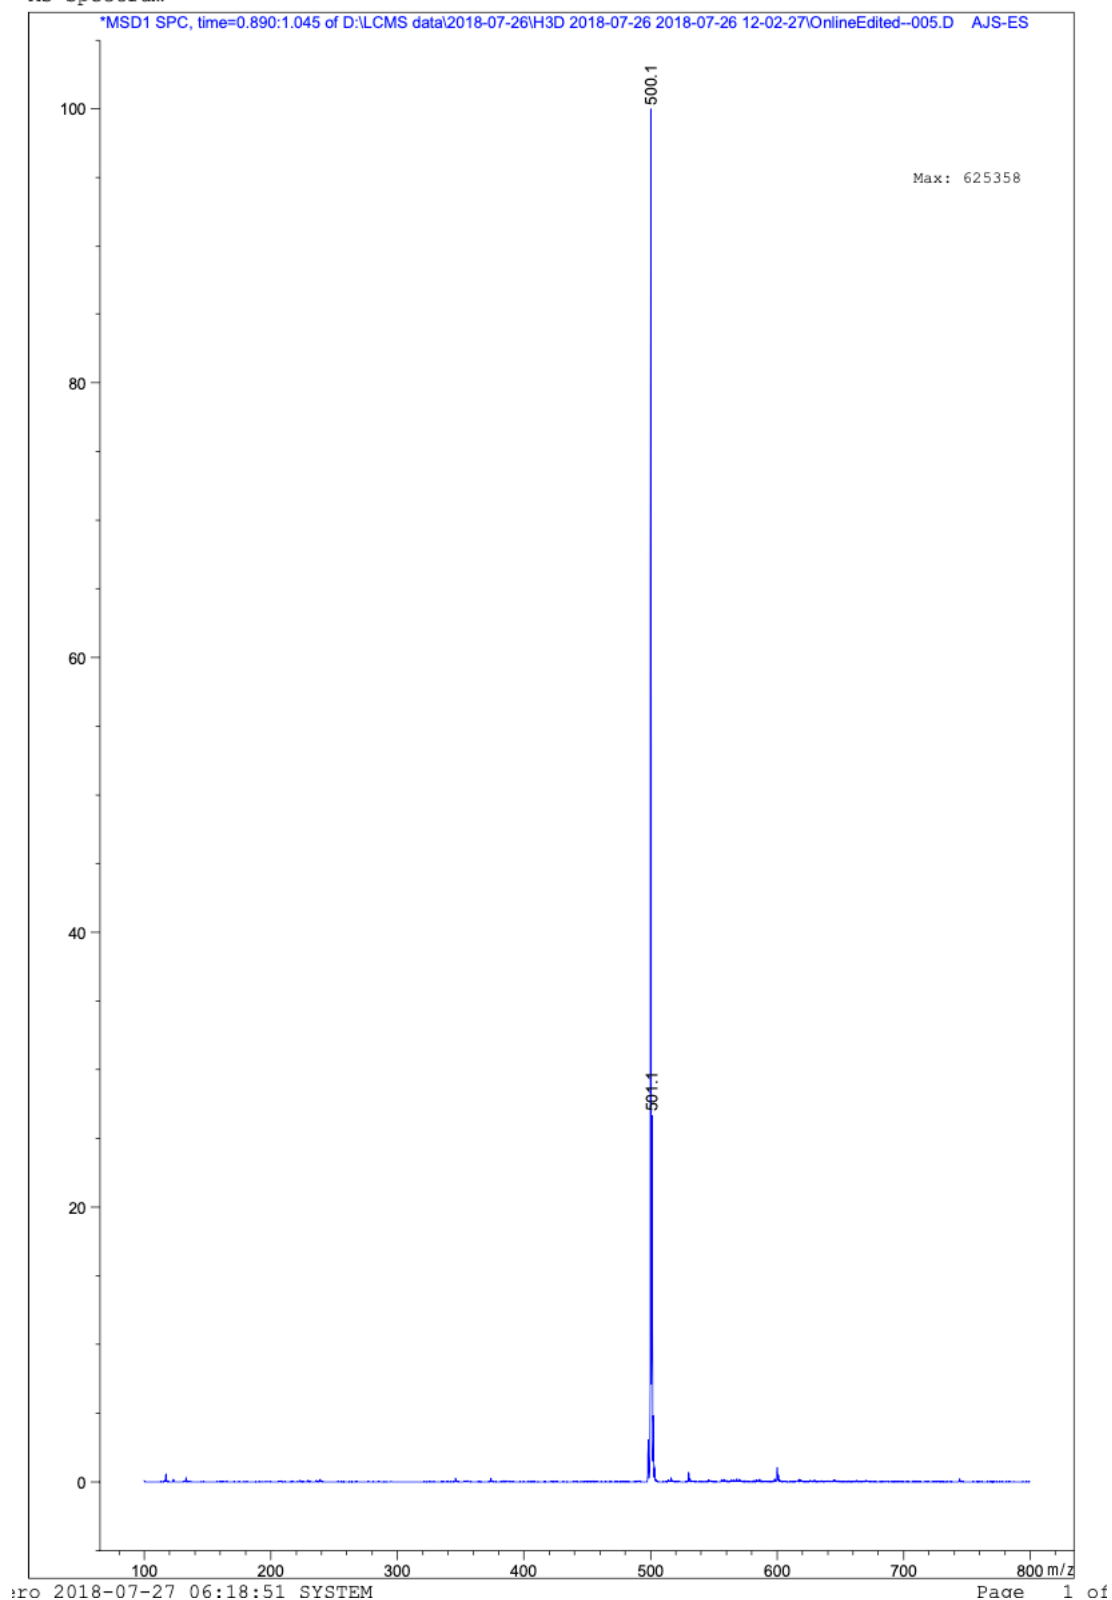

Compound 25

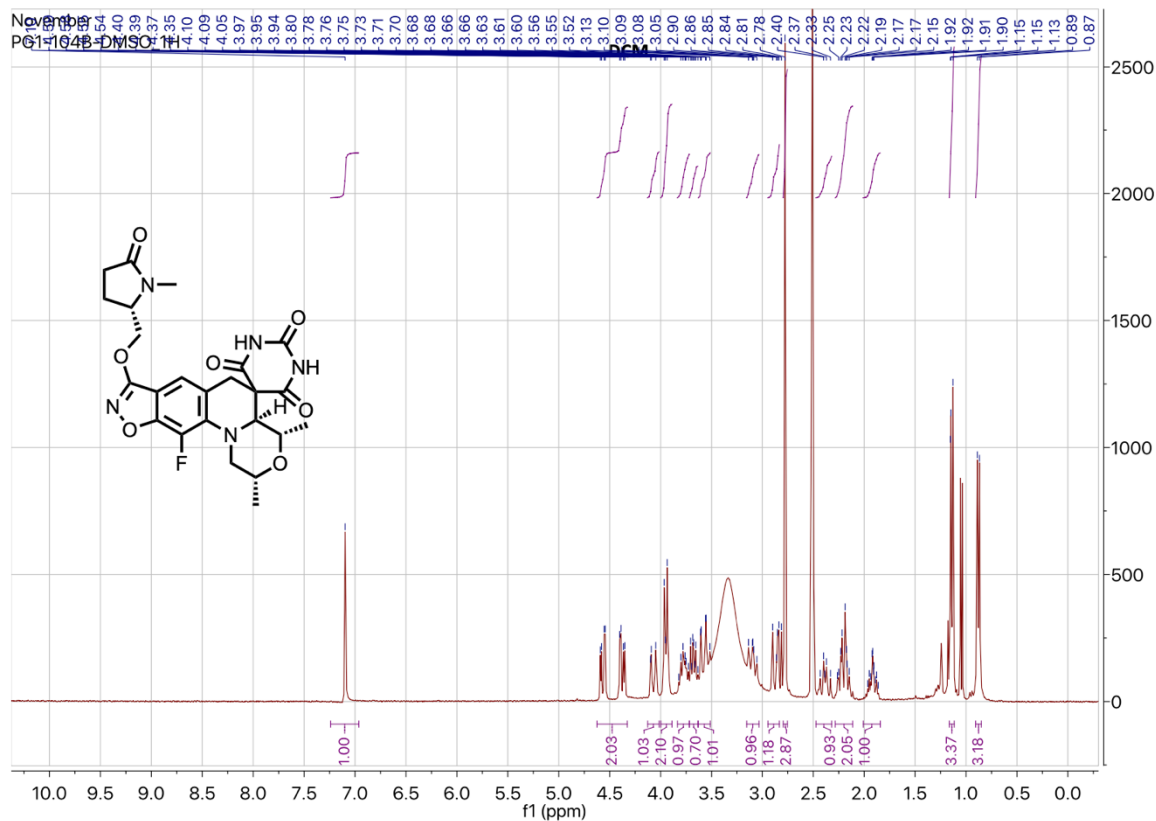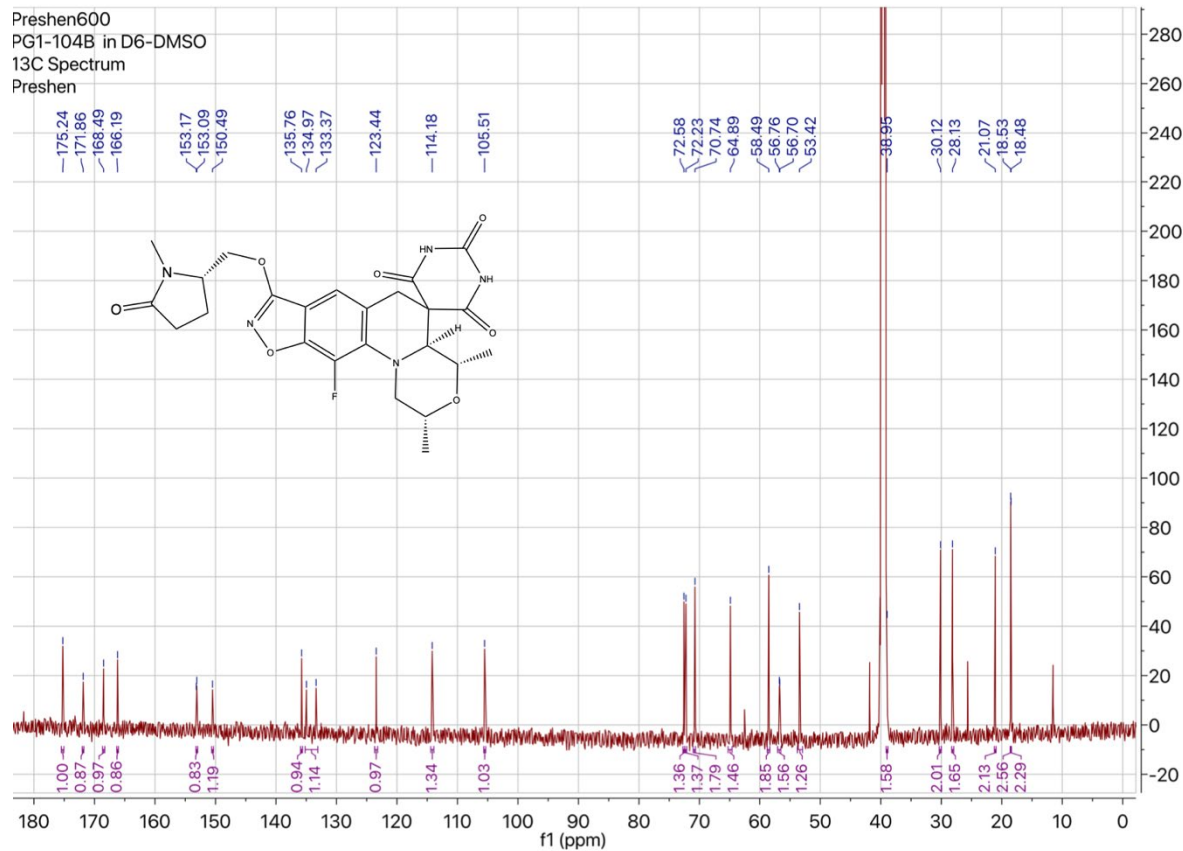

```

=====
Acq. Operator   : SYSTEM                               Seq. Line :    4
Acq. Instrument : Calimero                             Location  : P1-A5
Injection Date  : 2018-11-07 06:43:38                 Inj       :    1
                                                    Inj Volume: 1.000 µl

Method          : D:\LCMS data\2018-11-07\H3D 2018-11-07 2018-11-07 06-31-55\NEW GENERAL NEG.
                  M (Sequence Method)
Last changed    : 2018-11-07 06:31:55 by SYSTEM
Method Info     : Standard 2.2min method with 254nm, 280nm and 290nm and positive ESI mode
                  100-800m/z
  
```

Additional Info : Peak(s) manually integrated

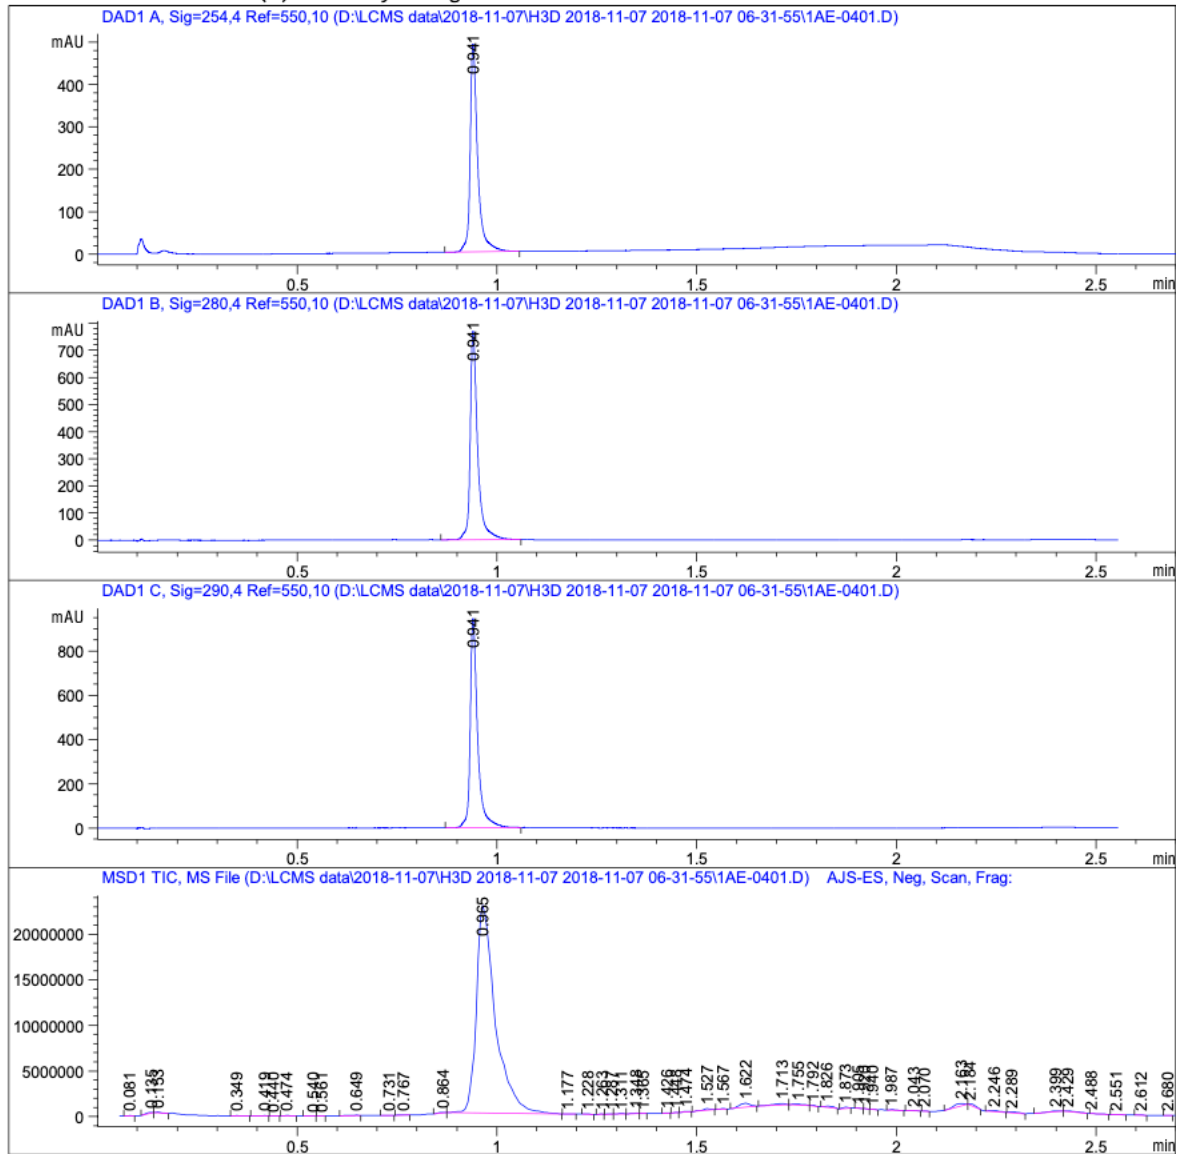



=====  
 Area Percent Report  
 =====

Sorted By : Signal  
 Multiplier : 1.0000  
 Dilution : 1.0000  
 Do not use Multiplier & Dilution Factor with ISTDs

Signal 1: DAD1 A, Sig=254,4 Ref=550,10

| Peak # | RetTime [min] | Type | Width [min] | Area [mAU*s] | Height [mAU] | Area %   |
|--------|---------------|------|-------------|--------------|--------------|----------|
| 1      | 0.941         | BB   | 0.0193      | 639.24969    | 488.06320    | 100.0000 |

Totals : 639.24969 488.06320

Signal 2: DAD1 B, Sig=280,4 Ref=550,10

| Peak # | RetTime [min] | Type | Width [min] | Area [mAU*s] | Height [mAU] | Area %   |
|--------|---------------|------|-------------|--------------|--------------|----------|
| 1      | 0.941         | BB   | 0.0191      | 991.06561    | 765.17273    | 100.0000 |

Totals : 991.06561 765.17273

Signal 3: DAD1 C, Sig=290,4 Ref=550,10

| Peak # | RetTime [min] | Type | Width [min] | Area [mAU*s] | Height [mAU] | Area %   |
|--------|---------------|------|-------------|--------------|--------------|----------|
| 1      | 0.941         | BB   | 0.0191      | 1214.28174   | 940.63983    | 100.0000 |

Totals : 1214.28174 940.63983

MS Spectrum

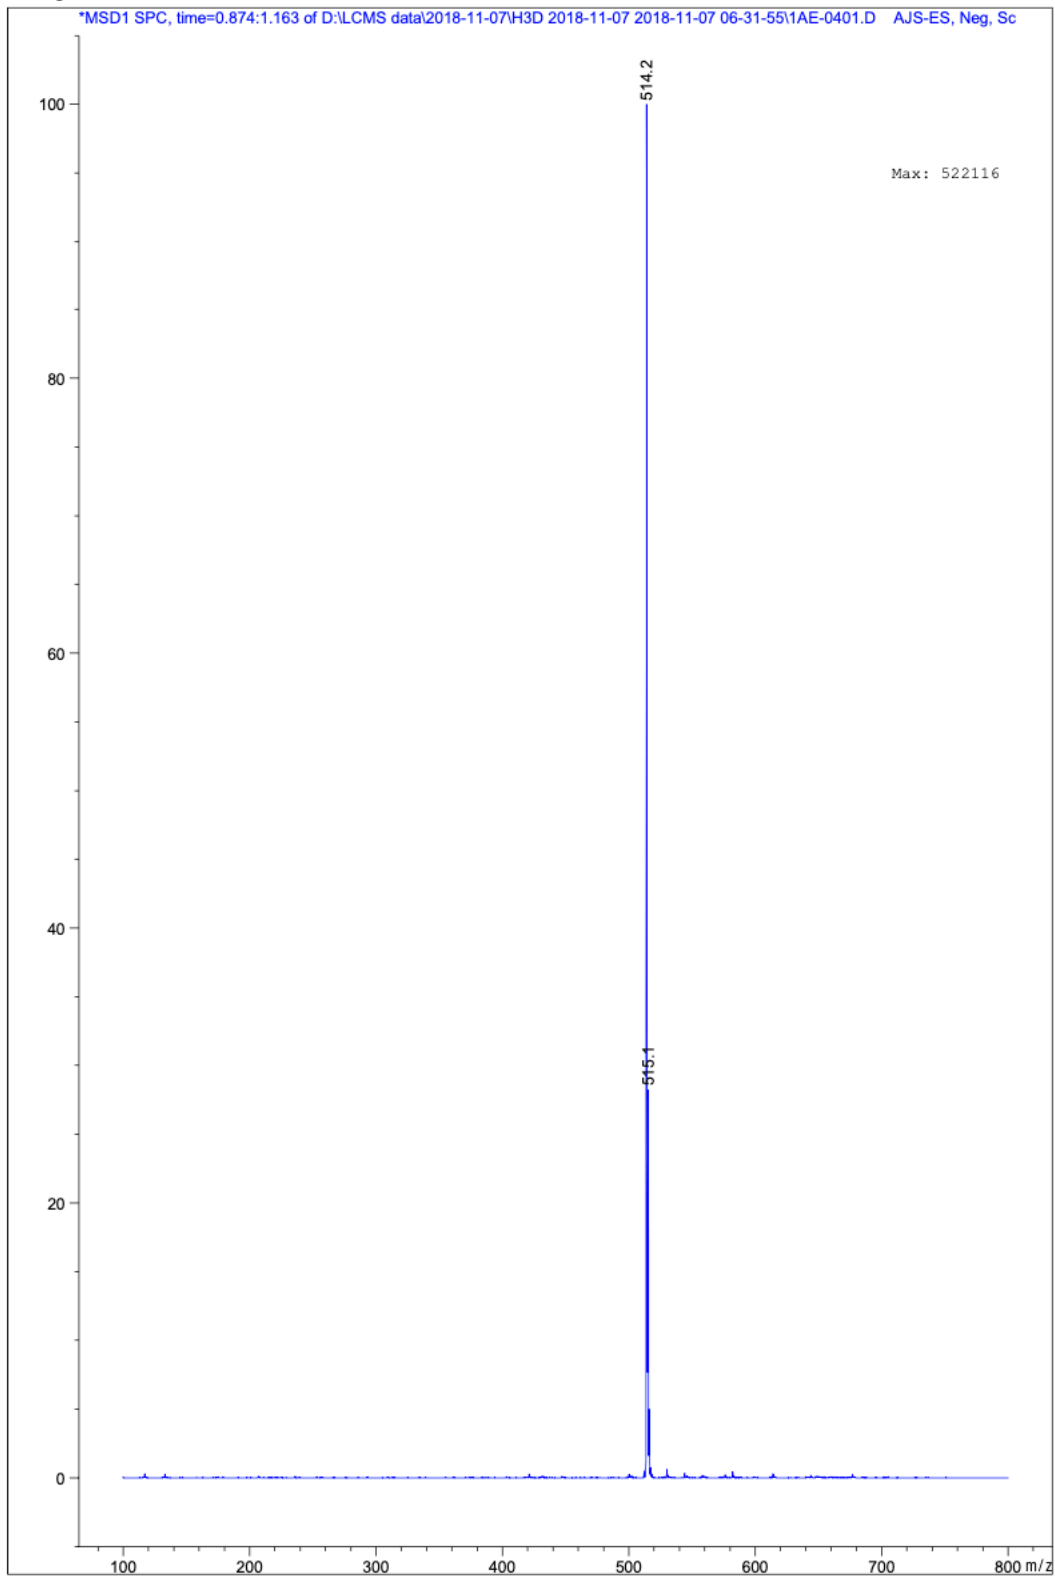

# Compound 26

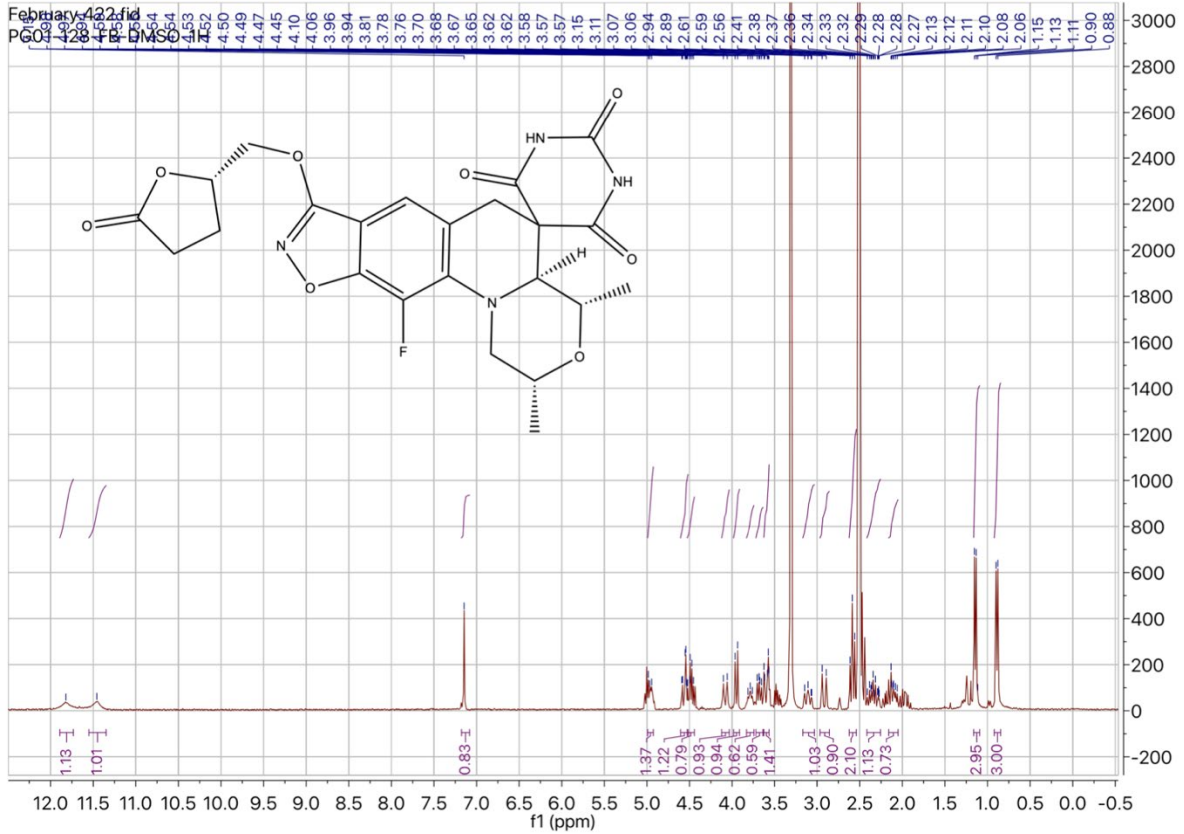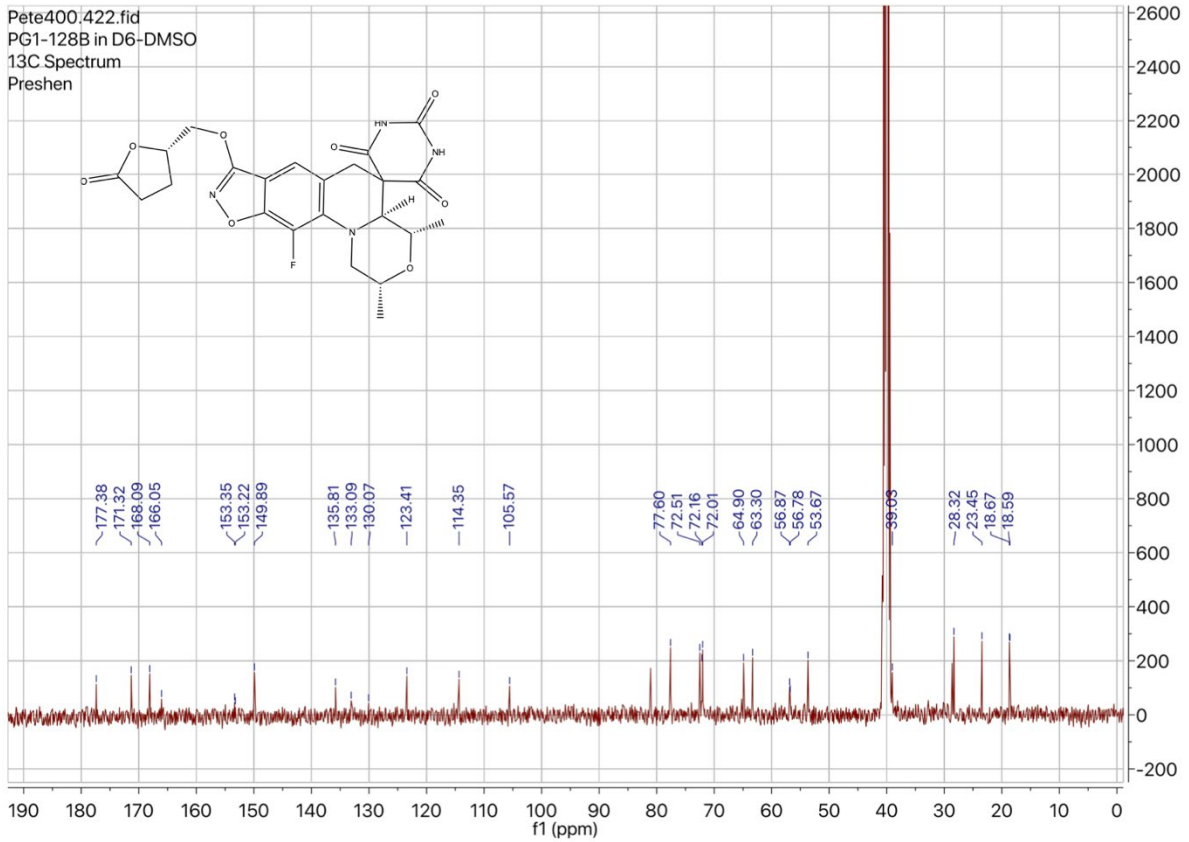

```

=====
Acq. Operator   : SYSTEM                               Seq. Line :    3
Acq. Instrument : Calimero                             Location  : P1-A2
Injection Date  : 2019-02-01 15:15:27                 Inj       :    1
                                                    Inj Volume: 1.000 µl
Method          : D:\LCMS data\2019-02-01\H3D 2019-02-01 2019-02-01 15-06-50\NEW GENERAL NEG.
                  M (Sequence Method)
Last changed    : 2019-02-01 15:06:50 by SYSTEM
Method Info     : Standard 2.2min method with 254nm, 280nm and 290nm and positive ESI mode
                  100-800m/z
  
```

Additional Info : Peak(s) manually integrated

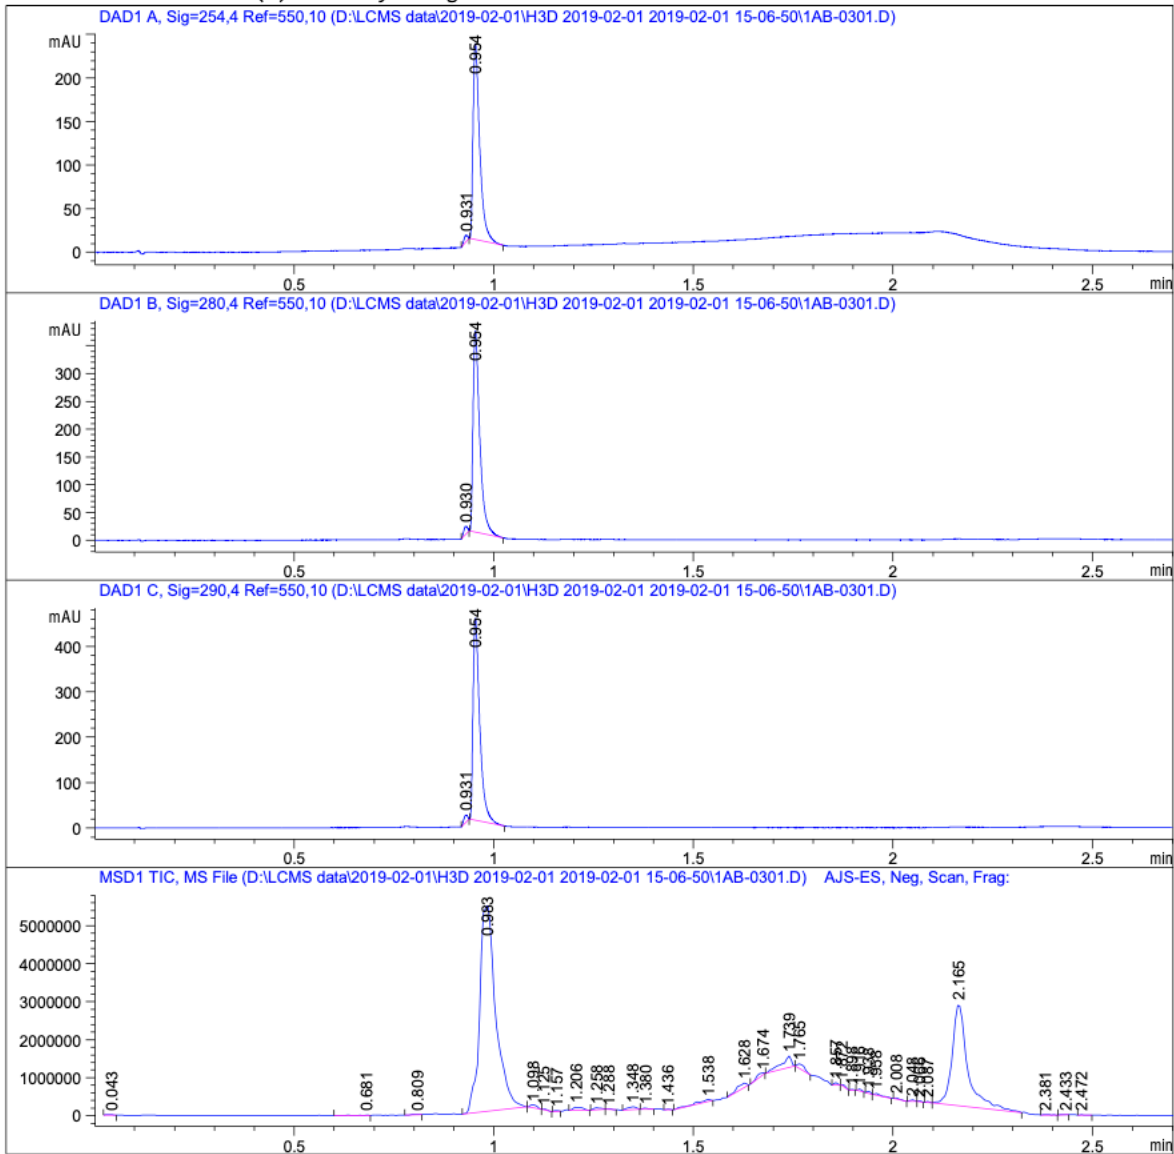

=====  
 Area Percent Report  
 =====

Sorted By : Signal  
 Multiplier : 1.0000  
 Dilution : 1.0000  
 Do not use Multiplier & Dilution Factor with ISTDs

Signal 1: DAD1 A, Sig=254,4 Ref=550,10

| Peak #   | RetTime [min] | Type | Width [min] | Area [mAU*s] | Height [mAU] | Area %  |
|----------|---------------|------|-------------|--------------|--------------|---------|
| 1        | 0.931         | BB   | 0.0120      | 5.01081      | 6.89715      | 1.8720  |
| 2        | 0.954         | BB   | 0.0177      | 262.66635    | 223.68578    | 98.1280 |
| Totals : |               |      |             | 267.67717    | 230.58293    |         |

Signal 2: DAD1 B, Sig=280,4 Ref=550,10

| Peak #   | RetTime [min] | Type | Width [min] | Area [mAU*s] | Height [mAU] | Area %  |
|----------|---------------|------|-------------|--------------|--------------|---------|
| 1        | 0.930         | BB   | 0.0117      | 9.42803      | 13.38401     | 2.1862  |
| 2        | 0.954         | BB   | 0.0177      | 421.82147    | 359.74792    | 97.8138 |
| Totals : |               |      |             | 431.24951    | 373.13193    |         |

Signal 3: DAD1 C, Sig=290,4 Ref=550,10

| Peak #   | RetTime [min] | Type | Width [min] | Area [mAU*s] | Height [mAU] | Area %  |
|----------|---------------|------|-------------|--------------|--------------|---------|
| 1        | 0.931         | BB   | 0.0117      | 10.55772     | 15.04663     | 1.9878  |
| 2        | 0.954         | BB   | 0.0177      | 520.57440    | 443.16541    | 98.0122 |
| Totals : |               |      |             | 531.13212    | 458.21204    |         |

MS Spectrum

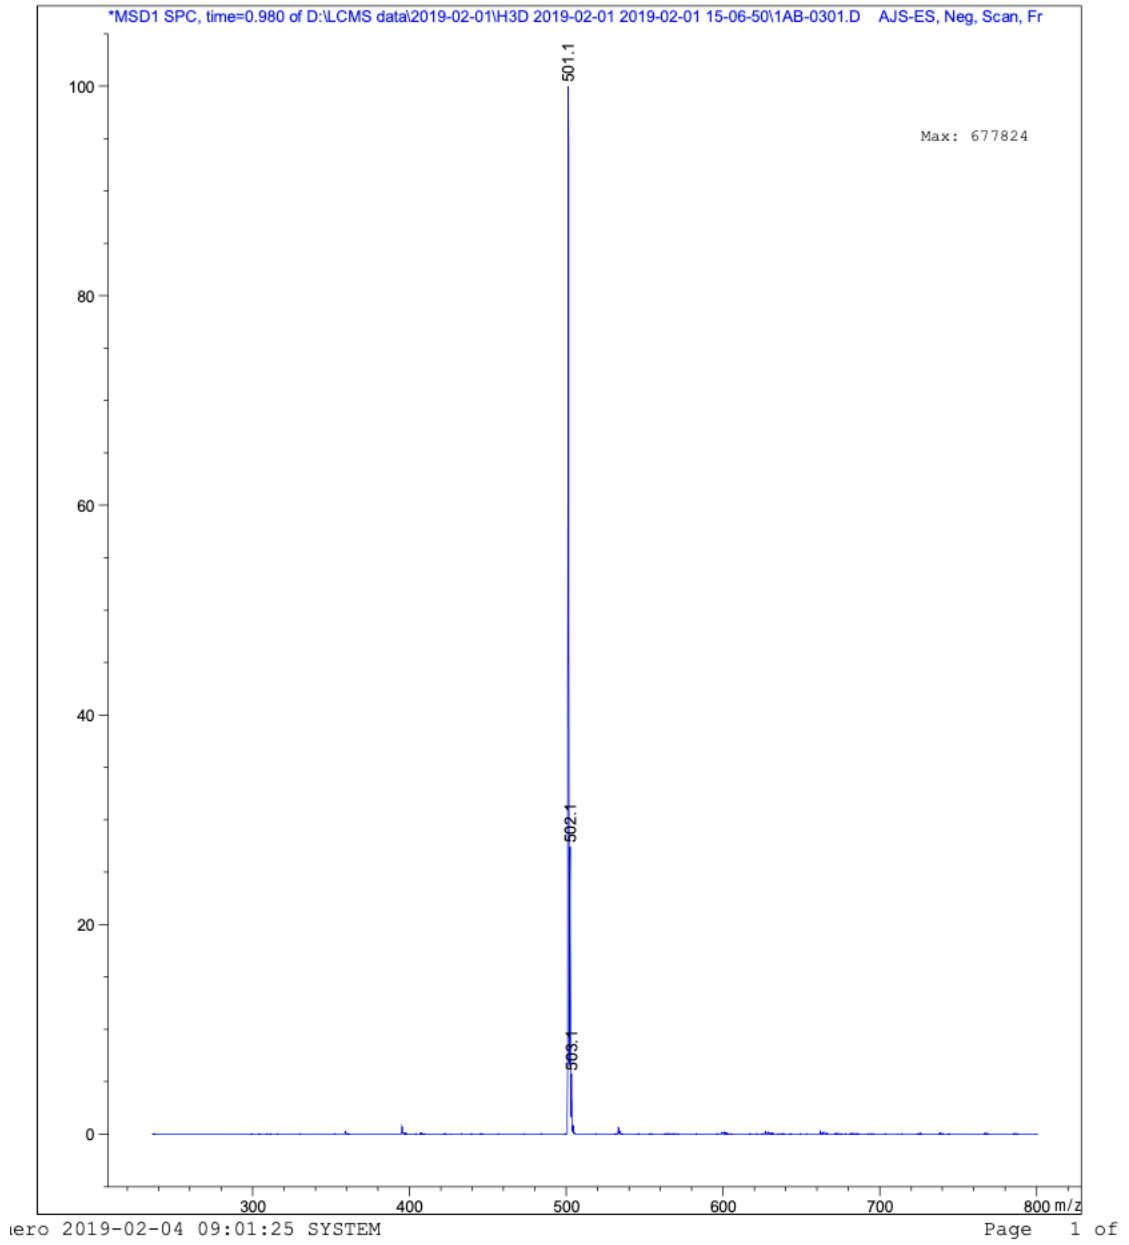

**Compound 28**

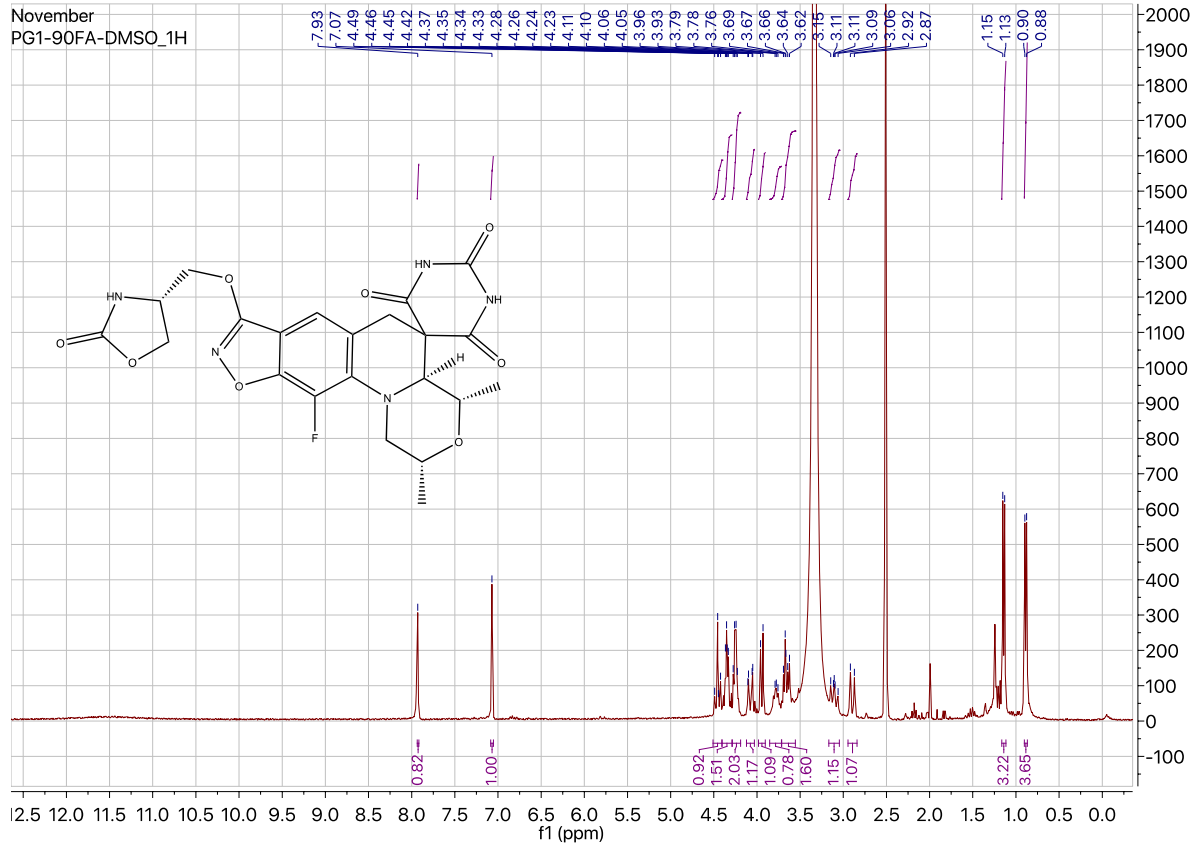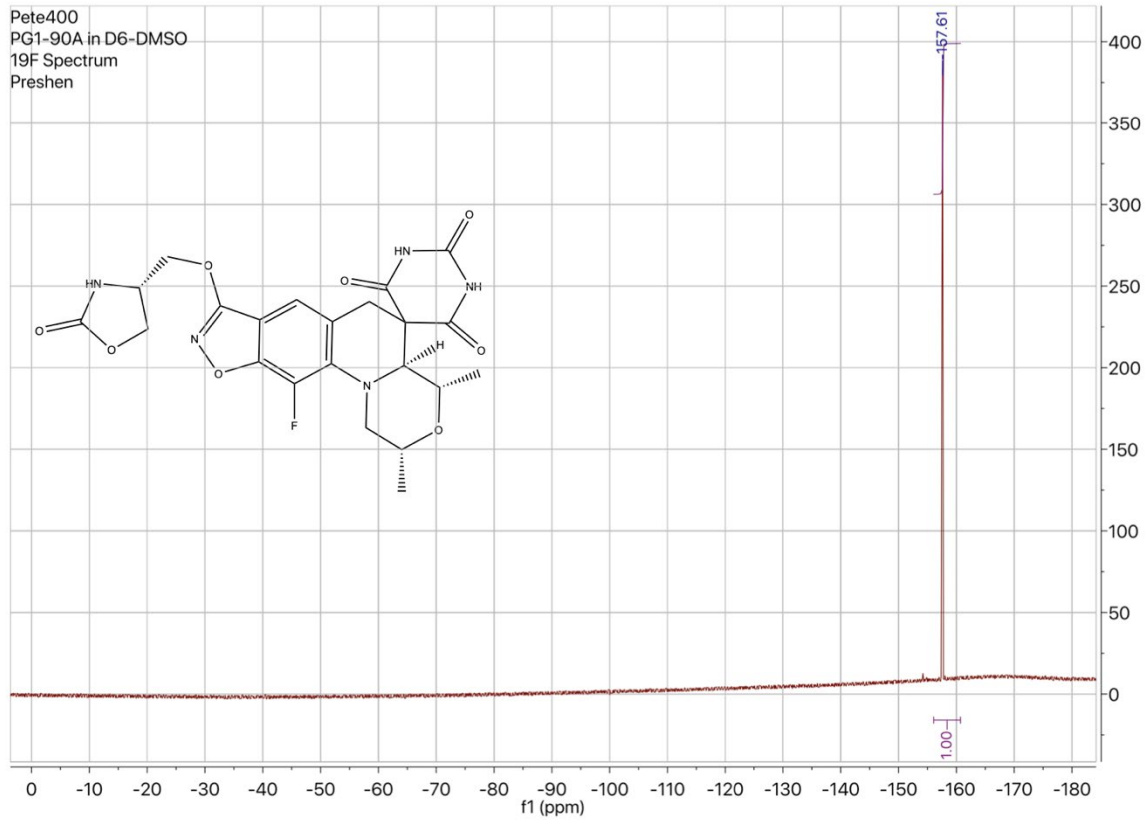

```

=====
Acq. Operator   : SYSTEM                      Seq. Line :    7
Acq. Instrument : Calimero                   Location  : P1-E1
Injection Date  : 2018-11-26 10:08:31       Inj       :    1
                                           Inj Volume: 1.000 µl

Method          : D:\LCMS data\2018-11-26\H3D 2018-11-26 2018-11-26 09-45-47\NEW GENERAL NEG.
                 M (Sequence Method)
Last changed    : 2018-11-26 10:07:20 by SYSTEM
Method Info     : Standard 2.2min method with 254nm, 280nm and 290nm and positive ESI mode
                 100-800m/z
  
```

Additional Info : Peak(s) manually integrated

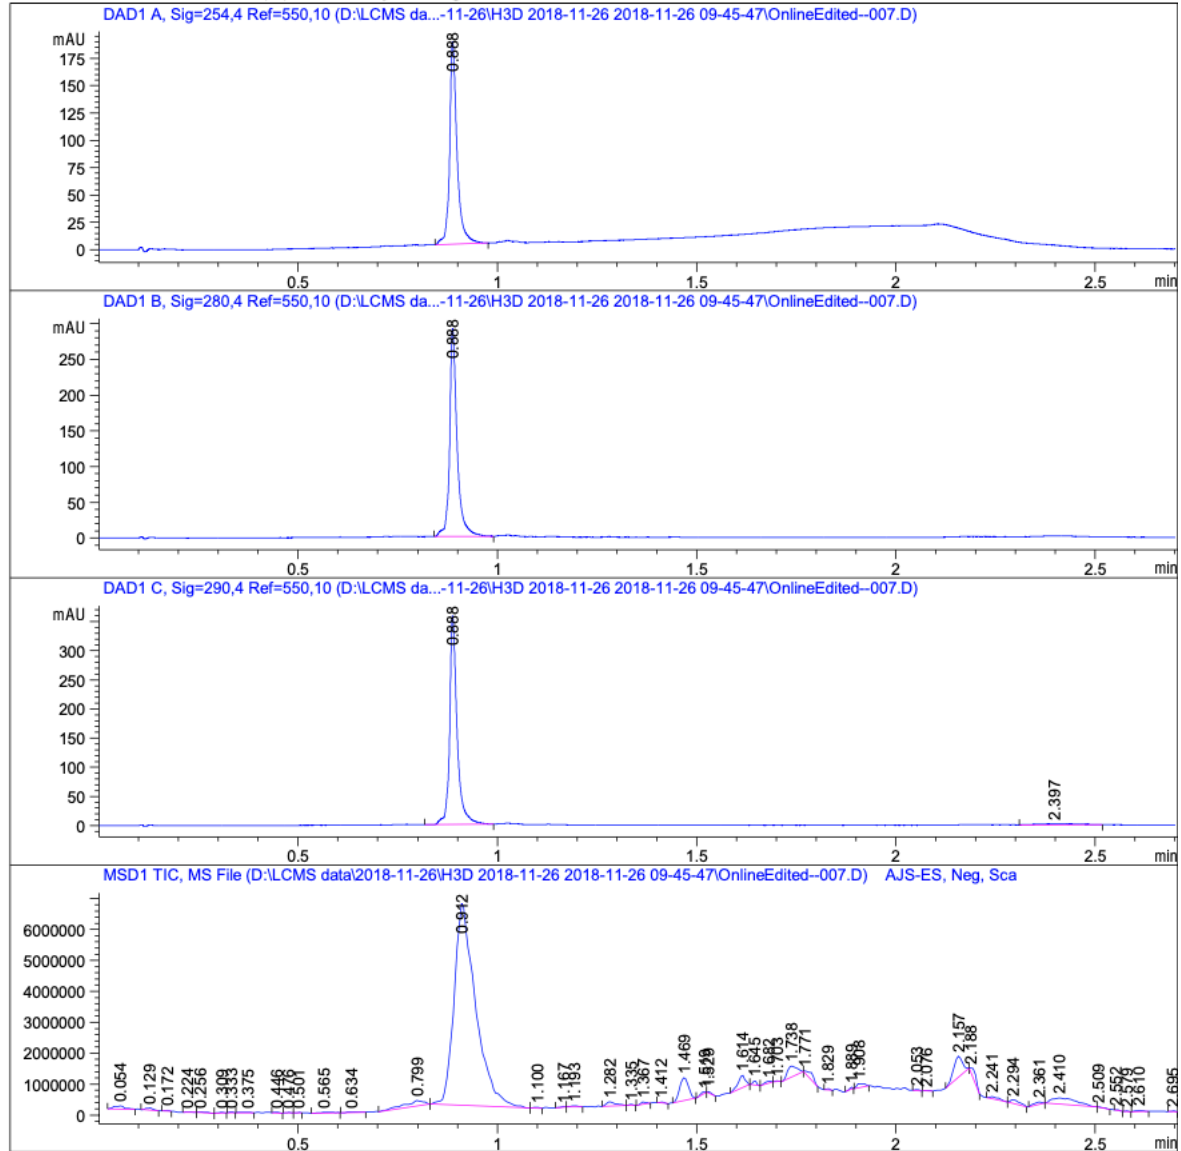



=====  
 Area Percent Report  
 =====

Sorted By : Signal  
 Multiplier : 1.0000  
 Dilution : 1.0000  
 Do not use Multiplier & Dilution Factor with ISTDs

Signal 1: DAD1 A, Sig=254,4 Ref=550,10

| Peak # | RetTime [min] | Type | Width [min] | Area [mAU*s] | Height [mAU] | Area %   |
|--------|---------------|------|-------------|--------------|--------------|----------|
| 1      | 0.888         | BB   | 0.0187      | 240.88512    | 185.01770    | 100.0000 |

Totals : 240.88512 185.01770

Signal 2: DAD1 B, Sig=280,4 Ref=550,10

| Peak # | RetTime [min] | Type | Width [min] | Area [mAU*s] | Height [mAU] | Area %   |
|--------|---------------|------|-------------|--------------|--------------|----------|
| 1      | 0.888         | BB   | 0.0187      | 378.45972    | 290.17822    | 100.0000 |

Totals : 378.45972 290.17822

Signal 3: DAD1 C, Sig=290,4 Ref=550,10

| Peak # | RetTime [min] | Type | Width [min] | Area [mAU*s] | Height [mAU] | Area %  |
|--------|---------------|------|-------------|--------------|--------------|---------|
| 1      | 0.888         | BB   | 0.0187      | 466.76984    | 357.11227    | 97.2193 |
| 2      | 2.397         | BB   | 0.0820      | 13.35058     | 1.94685      | 2.7807  |

Totals : 480.12041 359.05912

MS Spectrum

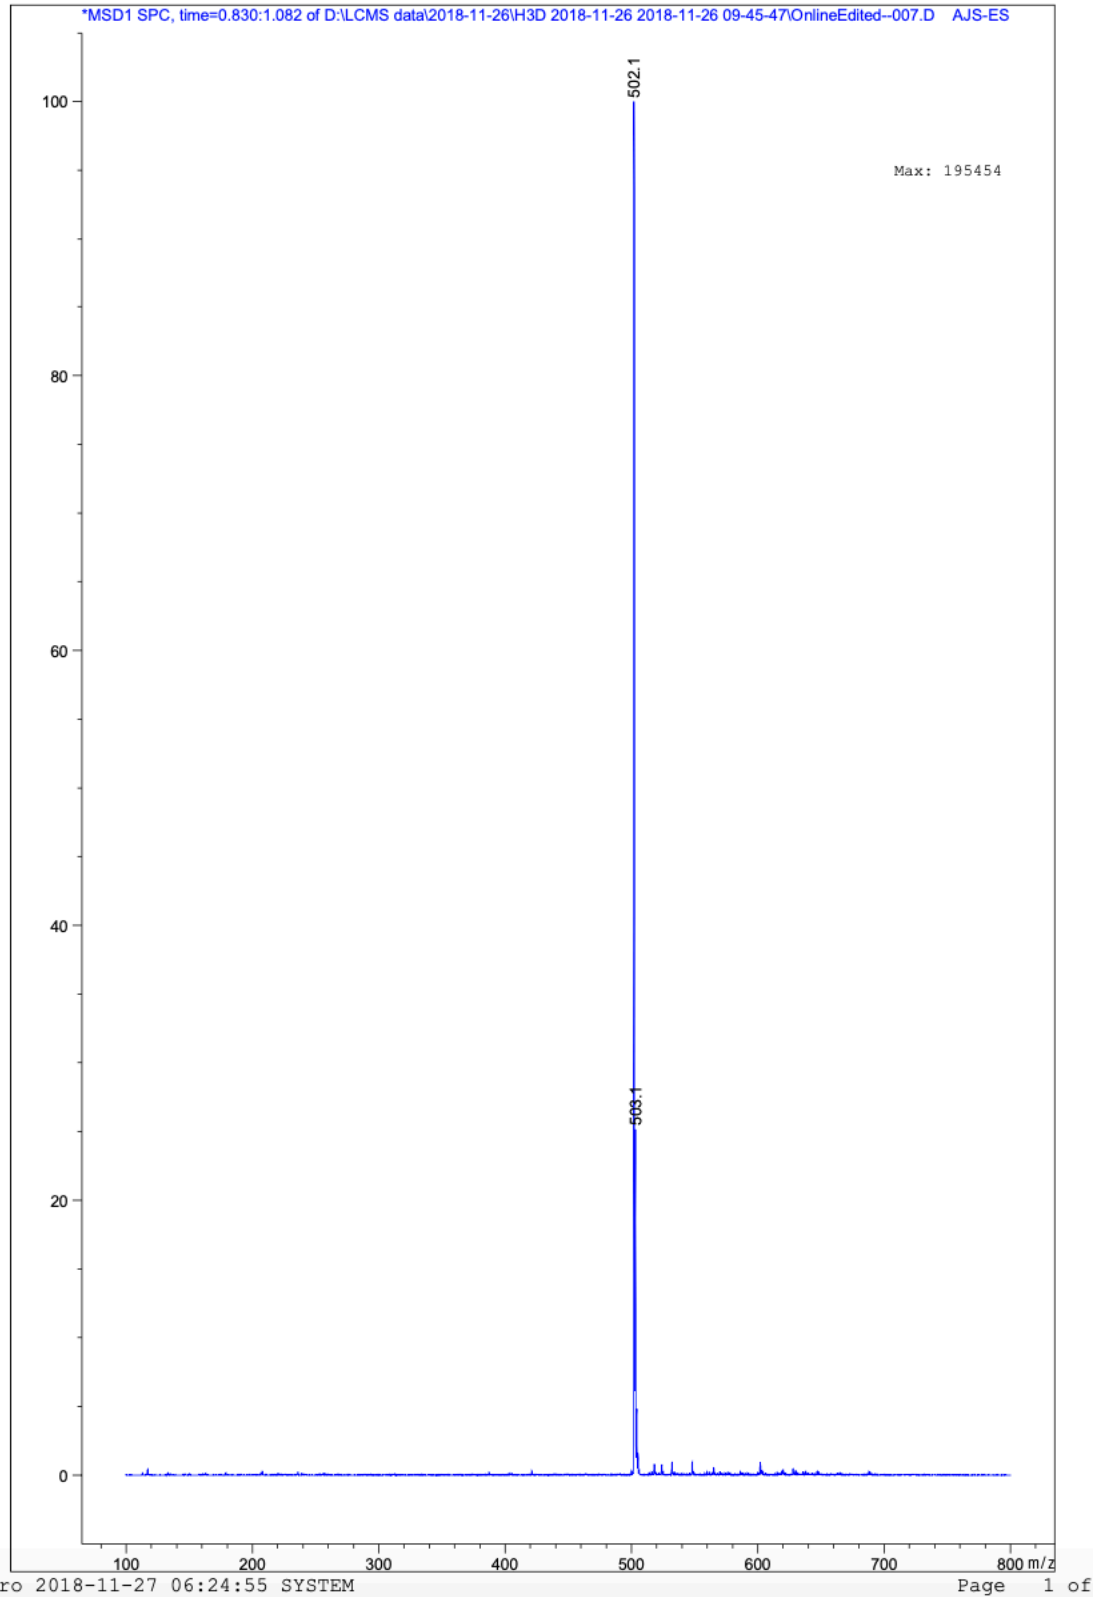

**Compound 33**



Pete400.2862.fid  
PG1-152.2 in D6-DMSO  
19F Spectrum  
Preshen

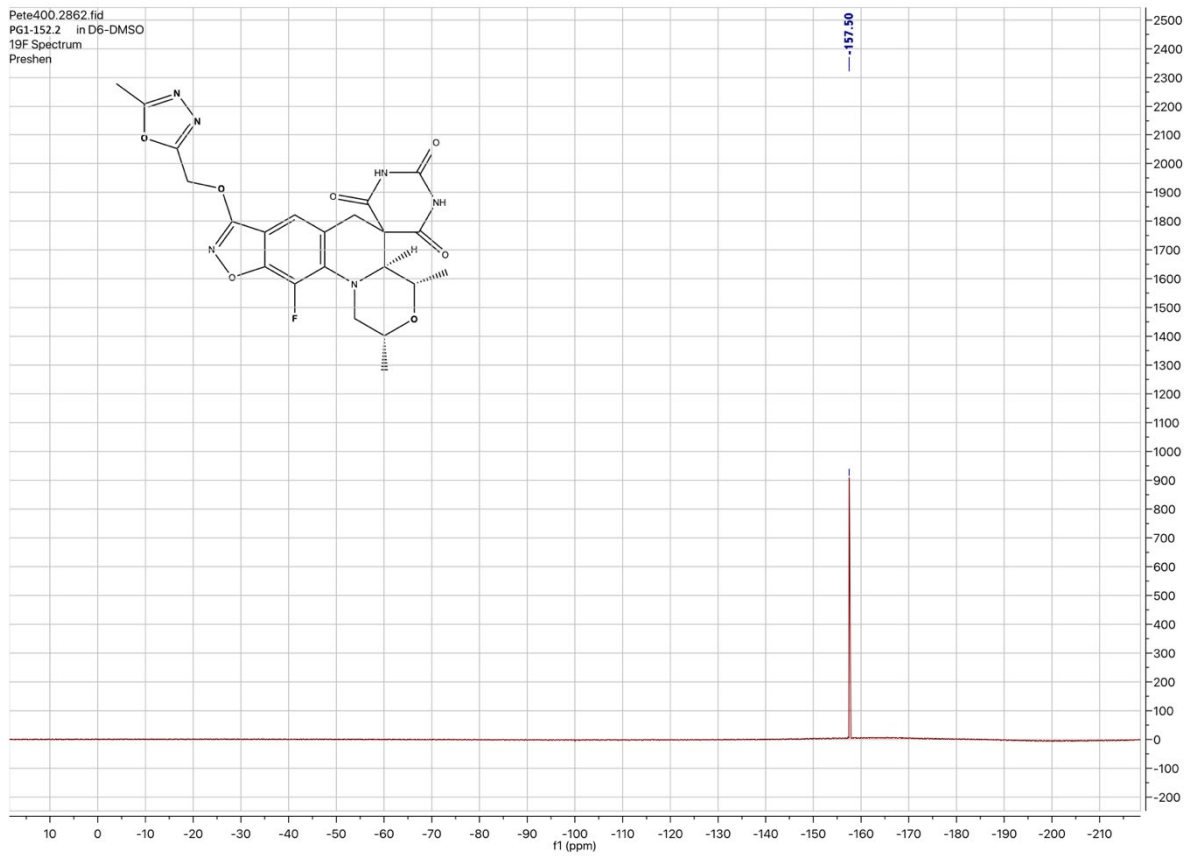

```

=====
Acq. Operator   : SYSTEM                               Seq. Line :   15
Acq. Instrument : Calimero                             Location  : P1-D1
Injection Date  : 2019-06-27 11:07:47                 Inj       :    1
                                                    Inj Volume: 1.000 µl

Method          : D:\LCMS data\2019-06-27\H3D 2019-06-27 2019-06-27 10-15-43\NEW GENERAL NEG.
                M (Sequence Method)
Last changed    : 2019-06-27 10:27:35 by SYSTEM
Method Info     : Standard 2.2min method with 254nm, 280nm and 290nm and positive ESI mode
                100-800m/z
  
```

Additional Info : Peak(s) manually integrated

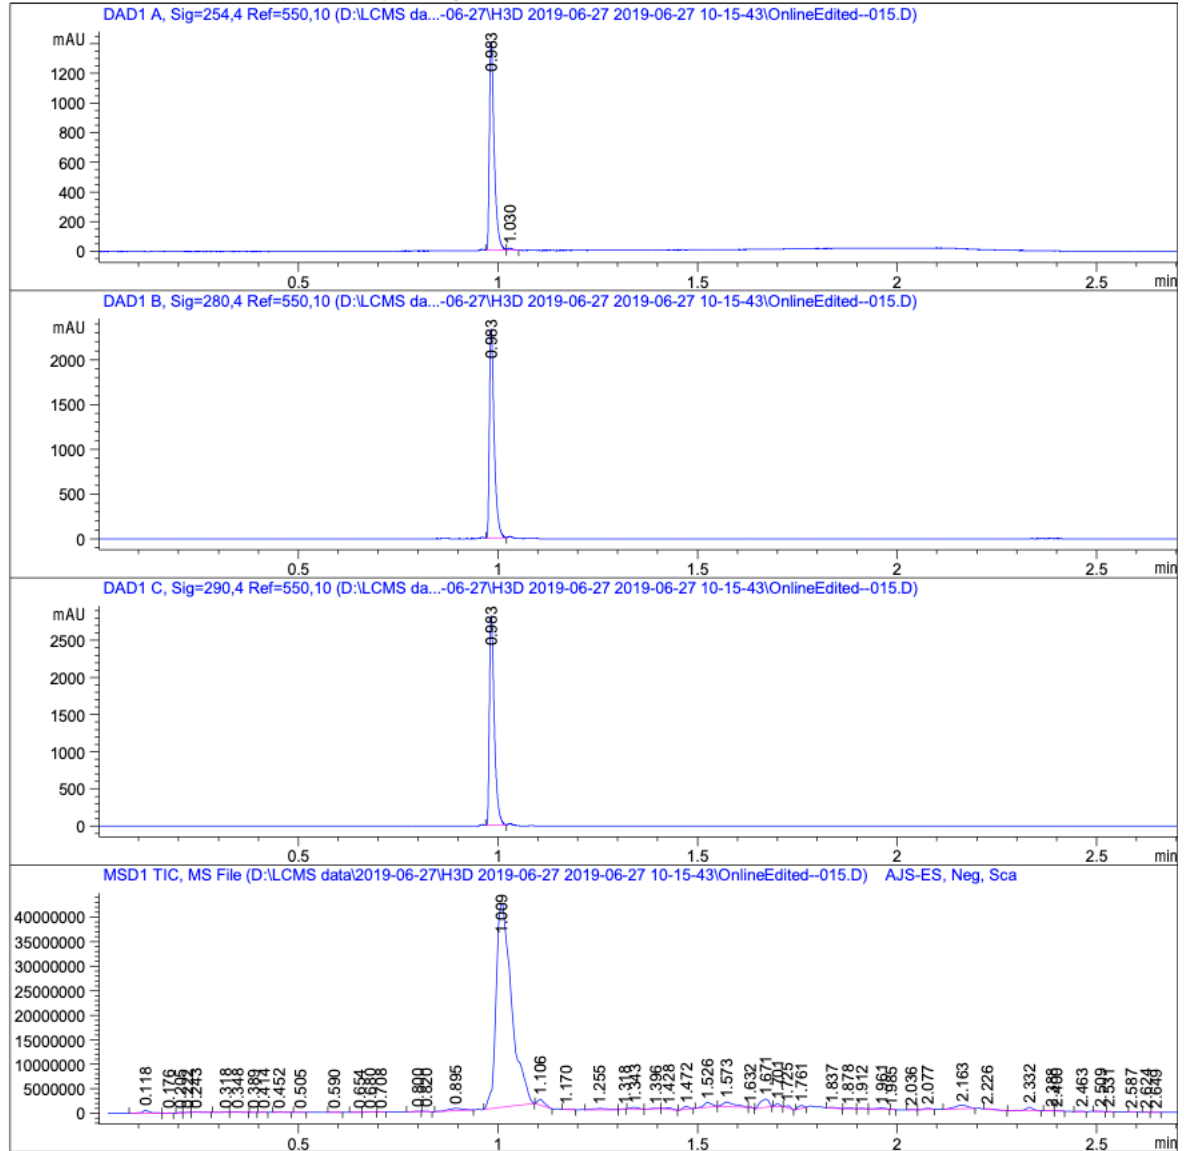

=====  
 Area Percent Report  
 =====

Sorted By : Signal  
 Multiplier : 1.0000  
 Dilution : 1.0000  
 Do not use Multiplier & Dilution Factor with ISTDs

Signal 1: DAD1 A, Sig=254,4 Ref=550,10

| Peak # | RetTime [min] | Type | Width [min] | Area [mAU*s] | Height [mAU] | Area %  |
|--------|---------------|------|-------------|--------------|--------------|---------|
| 1      | 0.983         | BB   | 0.0127      | 1166.26697   | 1403.49121   | 99.2968 |
| 2      | 1.030         | BB   | 0.0113      | 8.25875      | 11.57130     | 0.7032  |

Totals : 1174.52572 1415.06251

Signal 2: DAD1 B, Sig=280,4 Ref=550,10

| Peak # | RetTime [min] | Type | Width [min] | Area [mAU*s] | Height [mAU] | Area %   |
|--------|---------------|------|-------------|--------------|--------------|----------|
| 1      | 0.983         | BB   | 0.0127      | 1932.95618   | 2336.63159   | 100.0000 |

Totals : 1932.95618 2336.63159

Signal 3: DAD1 C, Sig=290,4 Ref=550,10

| Peak # | RetTime [min] | Type | Width [min] | Area [mAU*s] | Height [mAU] | Area %   |
|--------|---------------|------|-------------|--------------|--------------|----------|
| 1      | 0.983         | BB   | 0.0129      | 2403.87866   | 2819.24976   | 100.0000 |

Totals : 2403.87866 2819.24976

MS Spectrum

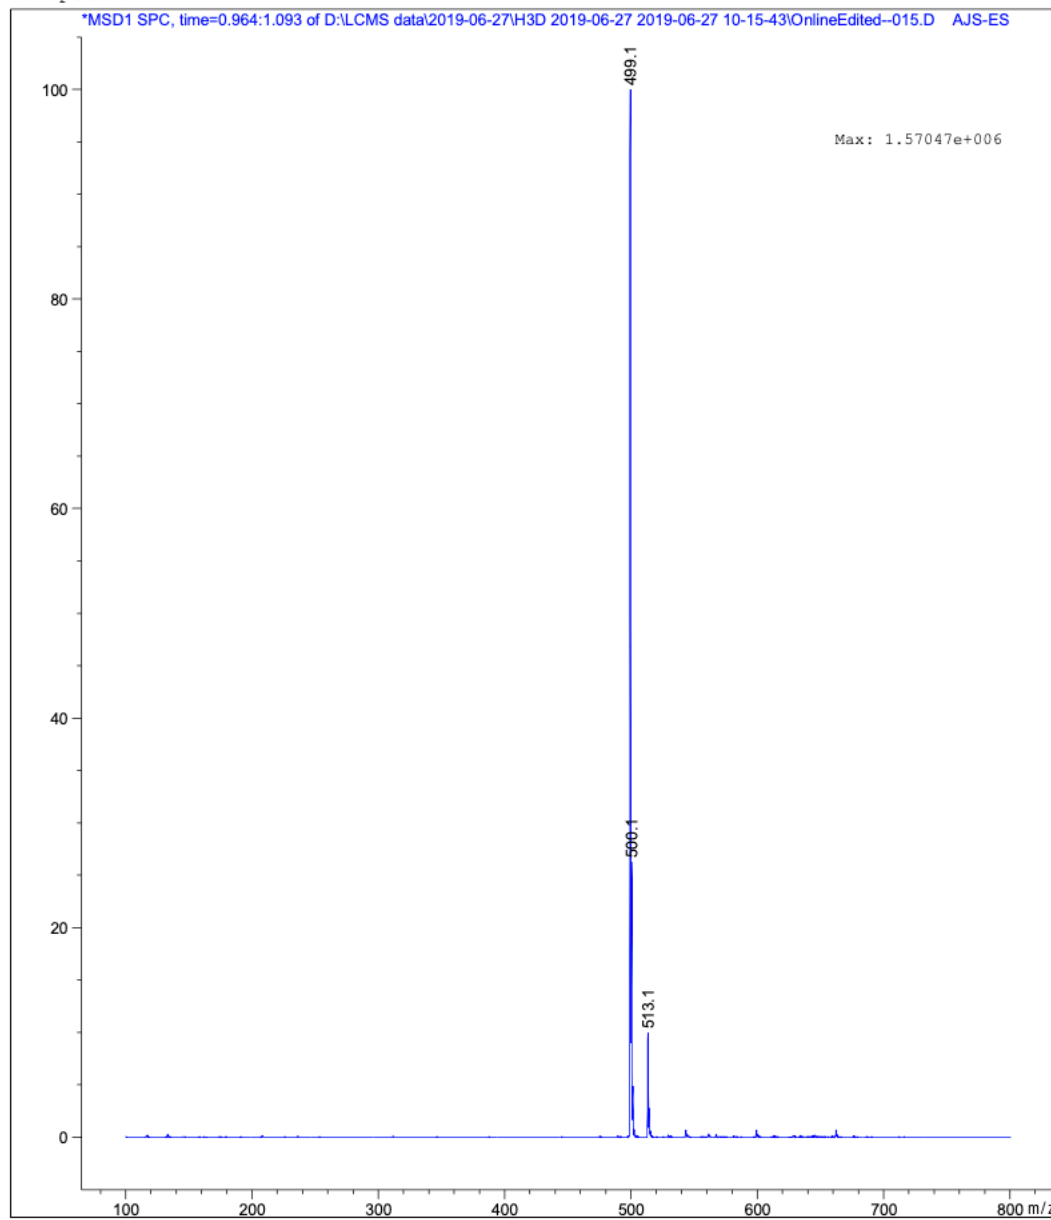

# Compound 30

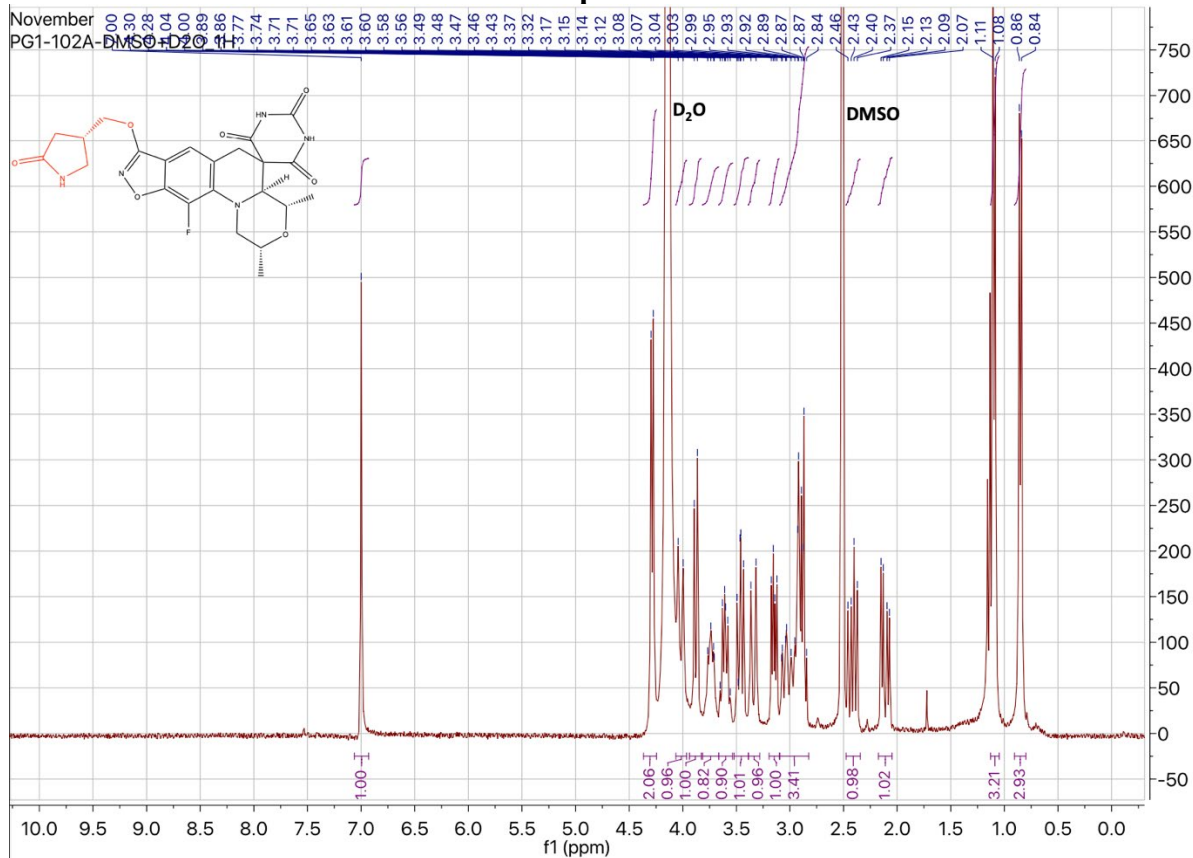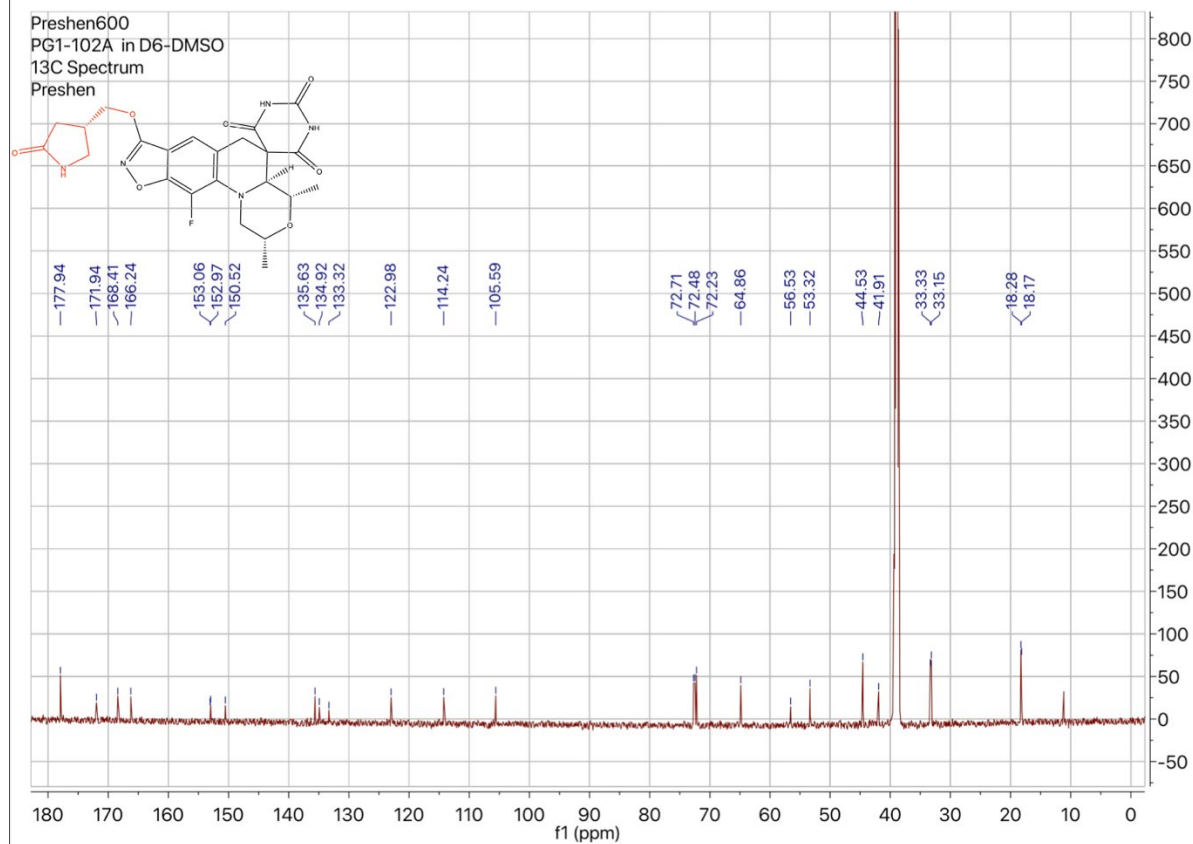



```

=====
Acq. Operator   : SYSTEM                               Seq. Line :    1
Acq. Instrument : Calimero                             Location  : P1-A2
Injection Date  : 2018-11-07 06:33:04                 Inj       :    1
                                                    Inj Volume: 1.000 µl

Method          : D:\LCMS data\2018-11-07\H3D 2018-11-07 2018-11-07 06-31-55\NEW GENERAL NEG.
                  M (Sequence Method)
Last changed    : 2018-11-07 06:31:55 by SYSTEM
Method Info     : Standard 2.2min method with 254nm, 280nm and 290nm and positive ESI mode
                  100-800m/z
  
```

Additional Info : Peak(s) manually integrated

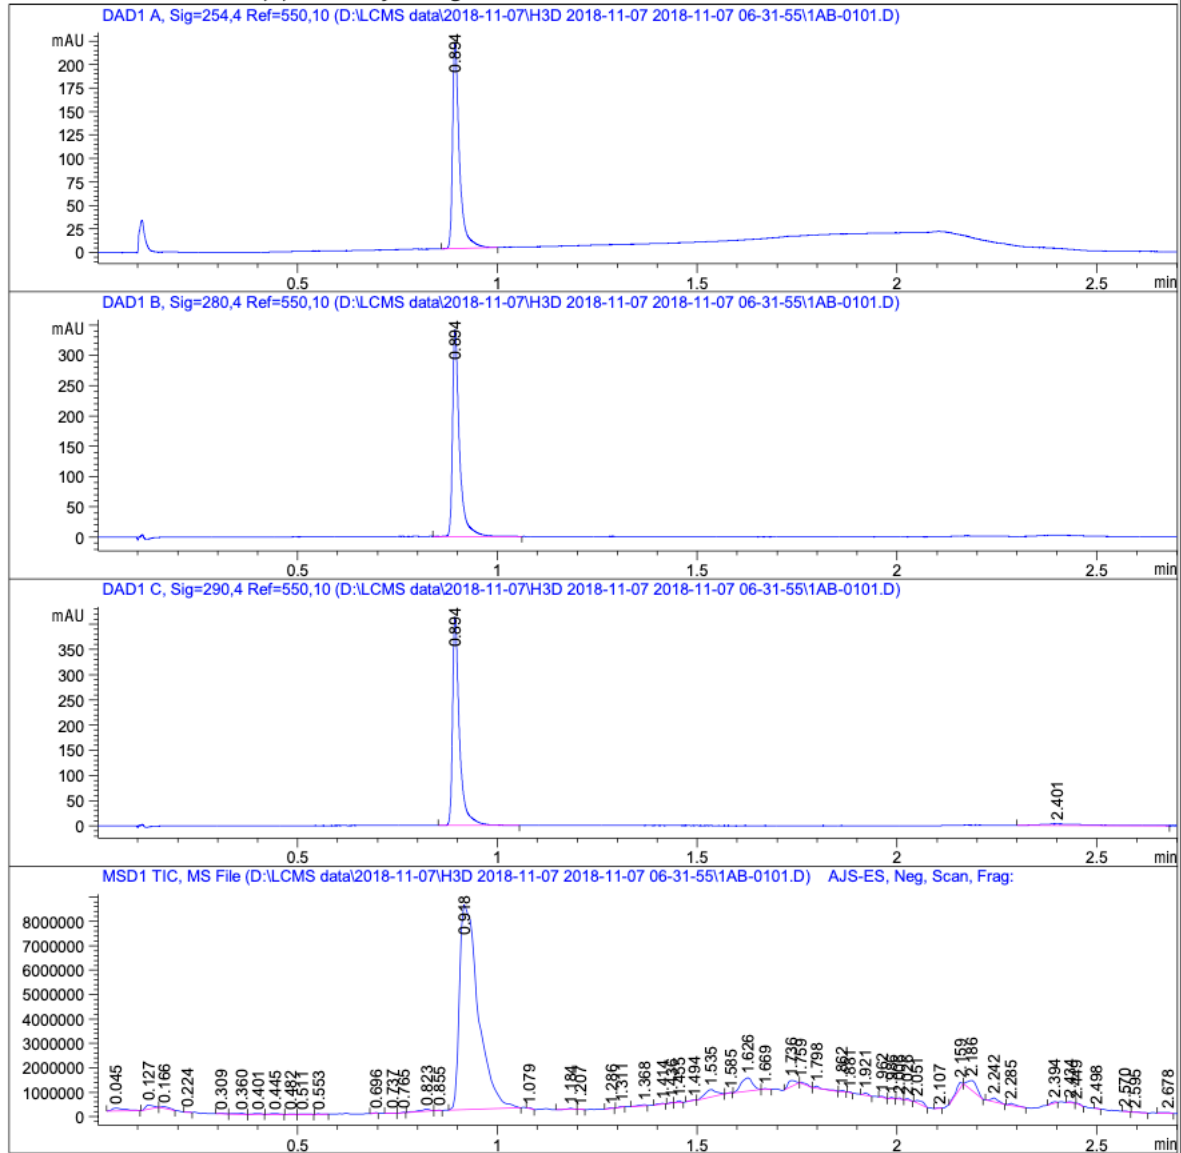

=====  
 Area Percent Report  
 =====

Sorted By : Signal  
 Multiplier : 1.0000  
 Dilution : 1.0000  
 Do not use Multiplier & Dilution Factor with ISTDs

Signal 1: DAD1 A, Sig=254,4 Ref=550,10

| Peak # | RetTime [min] | Type | Width [min] | Area [mAU*s] | Height [mAU] | Area %   |
|--------|---------------|------|-------------|--------------|--------------|----------|
| 1      | 0.894         | BB   | 0.0181      | 264.79385    | 218.42566    | 100.0000 |

Totals : 264.79385 218.42566

Signal 2: DAD1 B, Sig=280,4 Ref=550,10

| Peak # | RetTime [min] | Type | Width [min] | Area [mAU*s] | Height [mAU] | Area %   |
|--------|---------------|------|-------------|--------------|--------------|----------|
| 1      | 0.894         | BB   | 0.0182      | 413.66232    | 339.58585    | 100.0000 |

Totals : 413.66232 339.58585

Signal 3: DAD1 C, Sig=290,4 Ref=550,10

| Peak # | RetTime [min] | Type | Width [min] | Area [mAU*s] | Height [mAU] | Area %  |
|--------|---------------|------|-------------|--------------|--------------|---------|
| 1      | 0.894         | BB   | 0.0182      | 500.08047    | 411.54272    | 95.3150 |
| 2      | 2.401         | BB   | 0.1075      | 24.58017     | 2.73217      | 4.6850  |

Totals : 524.66064 414.27490

MS Spectrum

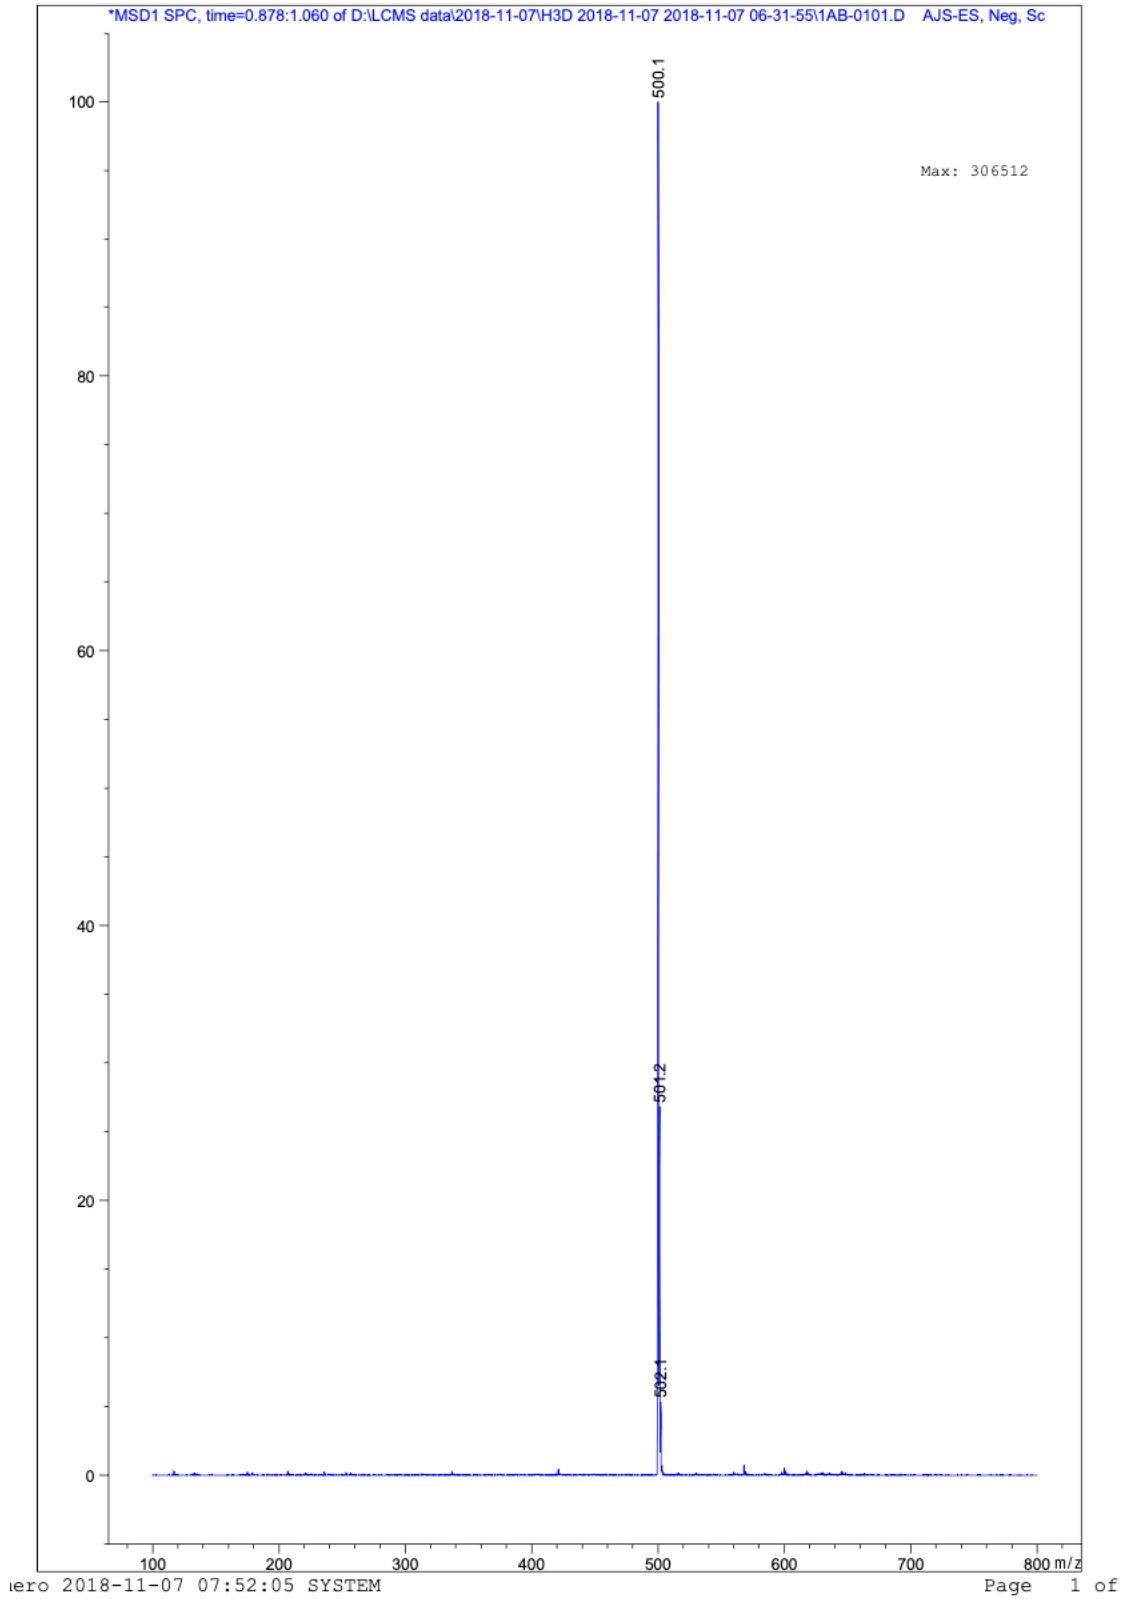

Compound 32

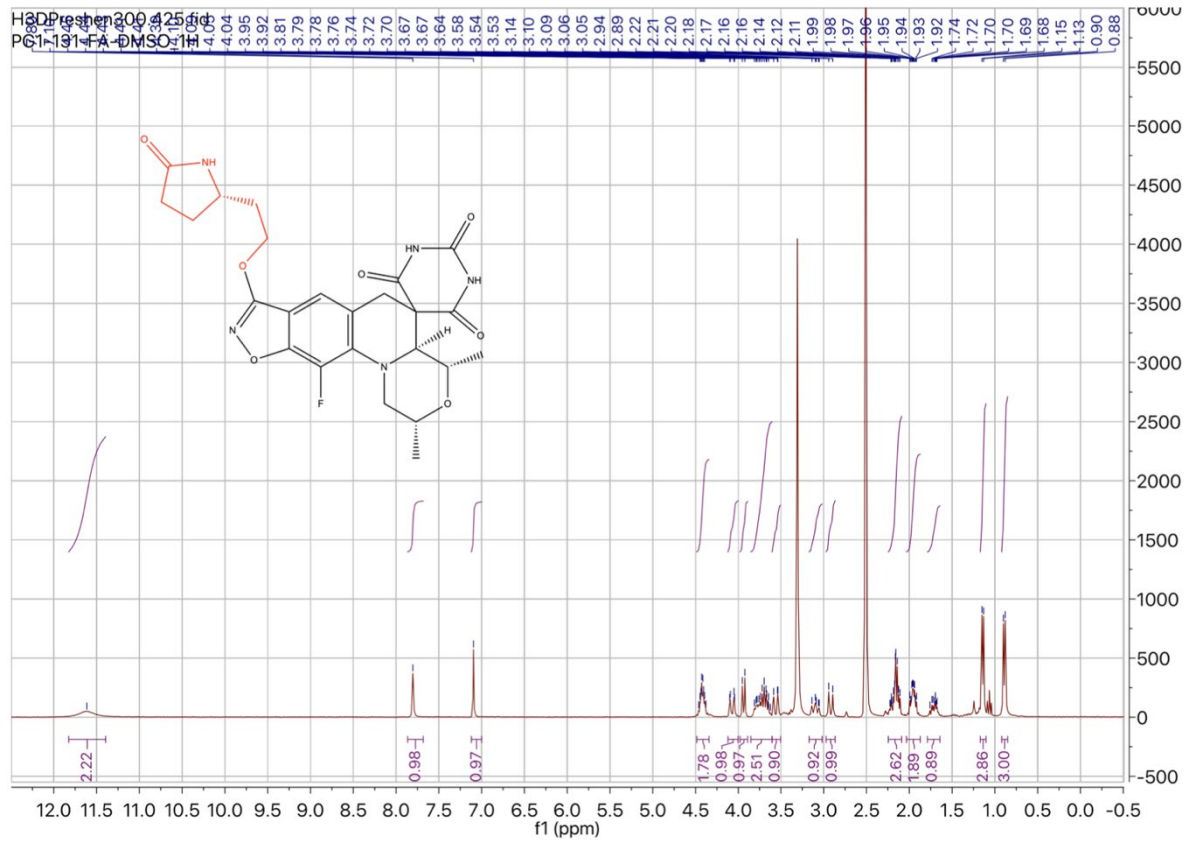

```

=====
Acq. Operator   : SYSTEM                               Seq. Line :    3
Acq. Instrument : Calimero                             Location  : P1-E1
Injection Date  : 2019-02-04 12:00:52                 Inj       :    1
                                                    Inj Volume: 1.000 µl

Method          : D:\LCMS data\2019-02-04\H3D 2019-02-04 2019-02-04 11-52-30\NEW GENERAL NEG.
                  M (Sequence Method)
Last changed    : 2019-02-04 11:53:07 by SYSTEM
Method Info     : Standard 2.2min method with 254nm, 280nm and 290nm and positive ESI mode
                  100-800m/z
  
```

Additional Info : Peak(s) manually integrated

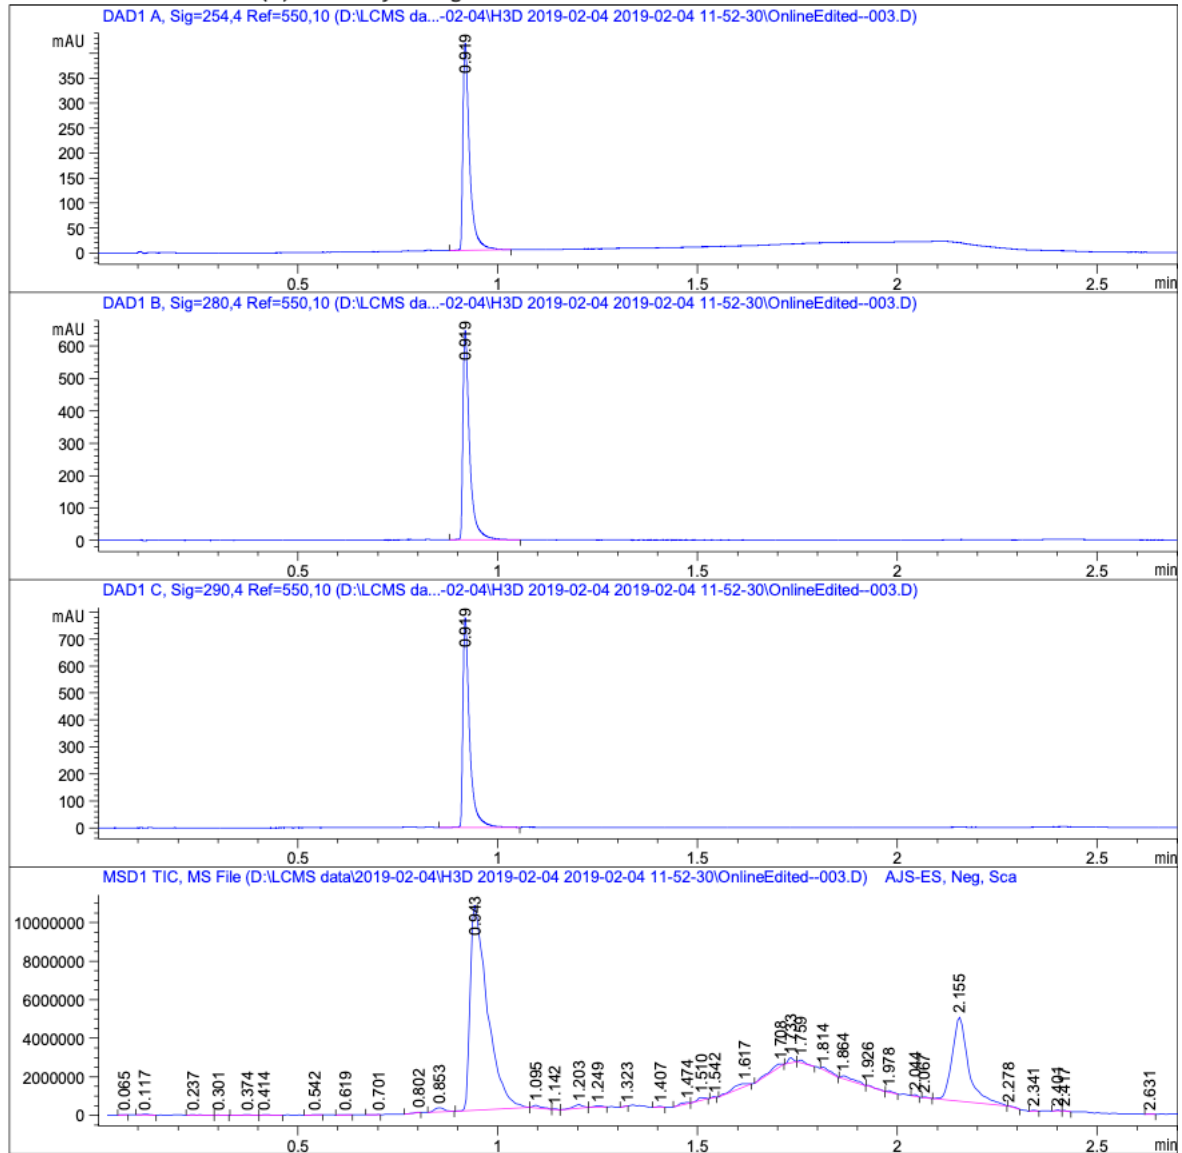

=====  
 Area Percent Report  
 =====

Sorted By : Signal  
 Multiplier : 1.0000  
 Dilution : 1.0000  
 Do not use Multiplier & Dilution Factor with ISTDs

Signal 1: DAD1 A, Sig=254,4 Ref=550,10

| Peak # | RetTime [min] | Type | Width [min] | Area [mAU*s] | Height [mAU] | Area %   |
|--------|---------------|------|-------------|--------------|--------------|----------|
| 1      | 0.919         | BB   | 0.0178      | 488.17245    | 412.54709    | 100.0000 |

Totals : 488.17245 412.54709

Signal 2: DAD1 B, Sig=280,4 Ref=550,10

| Peak # | RetTime [min] | Type | Width [min] | Area [mAU*s] | Height [mAU] | Area %   |
|--------|---------------|------|-------------|--------------|--------------|----------|
| 1      | 0.919         | BB   | 0.0177      | 757.15967    | 642.51489    | 100.0000 |

Totals : 757.15967 642.51489

Signal 3: DAD1 C, Sig=290,4 Ref=550,10

| Peak # | RetTime [min] | Type | Width [min] | Area [mAU*s] | Height [mAU] | Area %   |
|--------|---------------|------|-------------|--------------|--------------|----------|
| 1      | 0.919         | BB   | 0.0177      | 909.96307    | 772.32440    | 100.0000 |

Totals : 909.96307 772.32440

MS Spectrum

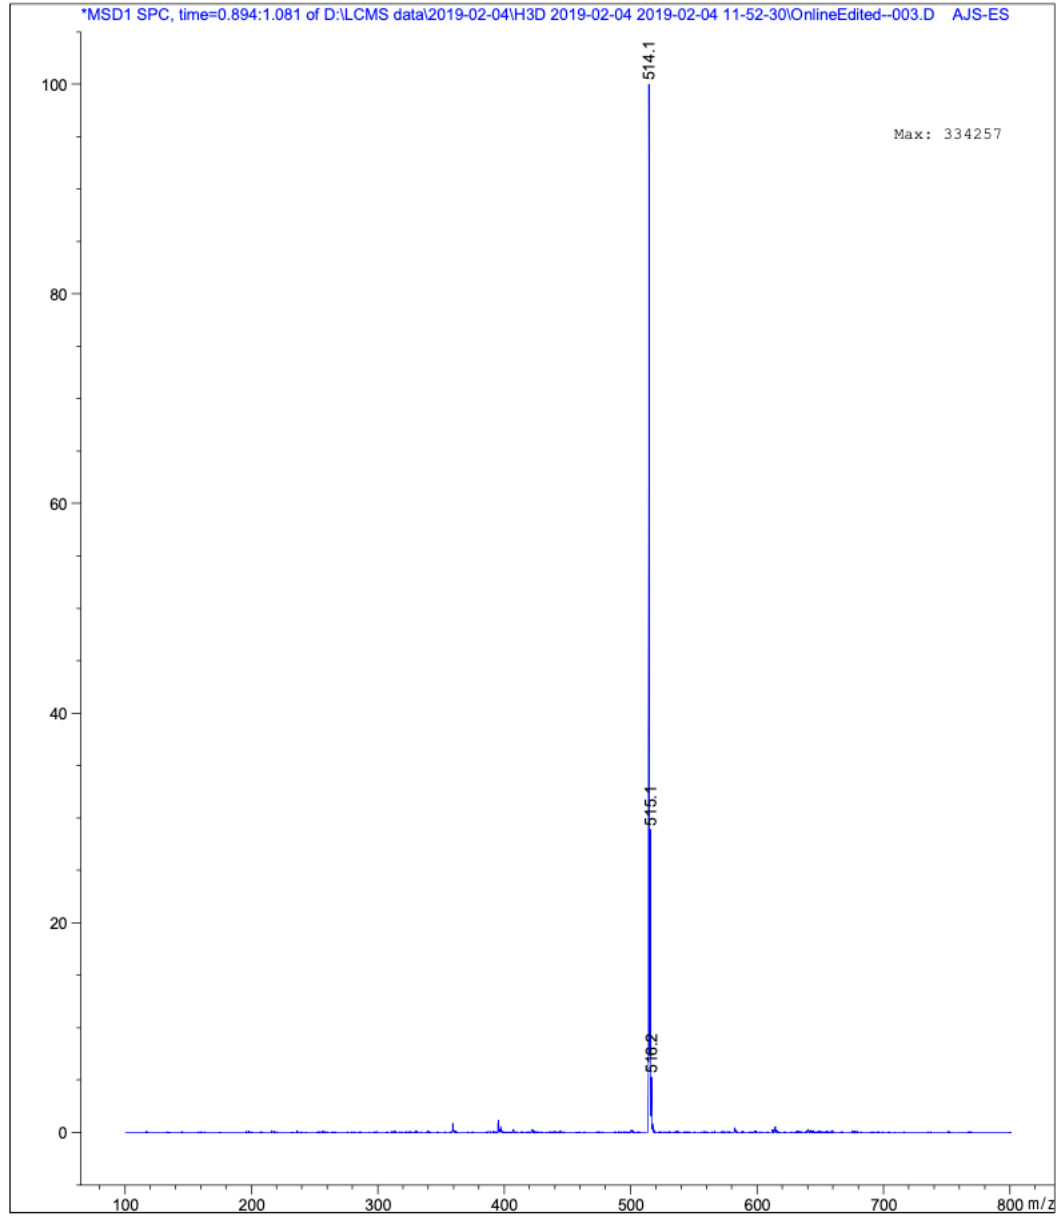

# Compound 37

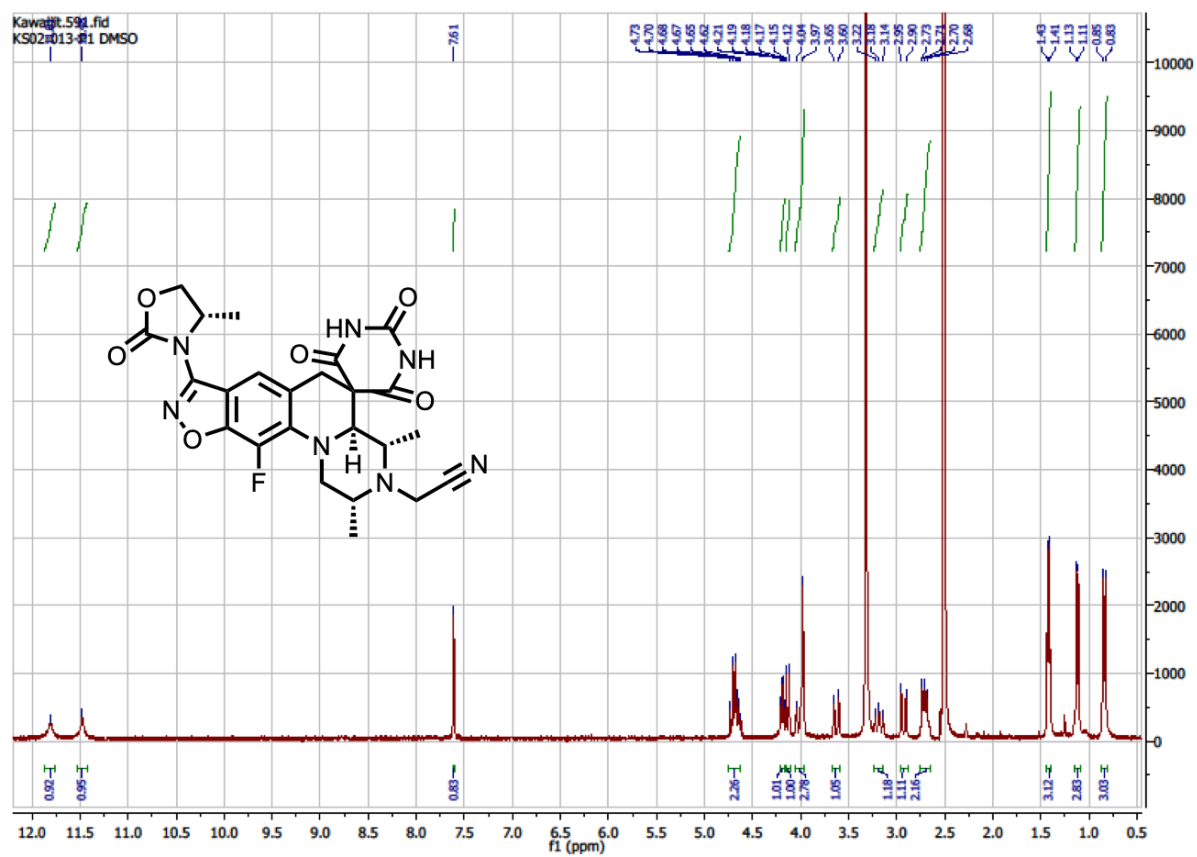



```

=====
Acq. Operator   : SYSTEM                               Seq. Line :    2
Acq. Instrument : Calimero                             Location  : P2-F2
Injection Date  : 2017-08-31 17:15:29                 Inj       :    1
                                                    Inj Volume: 1.000 µl

Method         : D:\LCMS data\2017-08-31\H3D 2017-07-21 2017-08-31 17-10-37\NEW GENERAL POS.
                M (Sequence Method)

Last changed   : 2017-08-31 17:10:37 by SYSTEM

Method Info    : Standard 2.2min method with 254nm, 280nm and 290nm and positive ESI mode
                100-800m/z
  
```

Additional Info : Peak(s) manually integrated

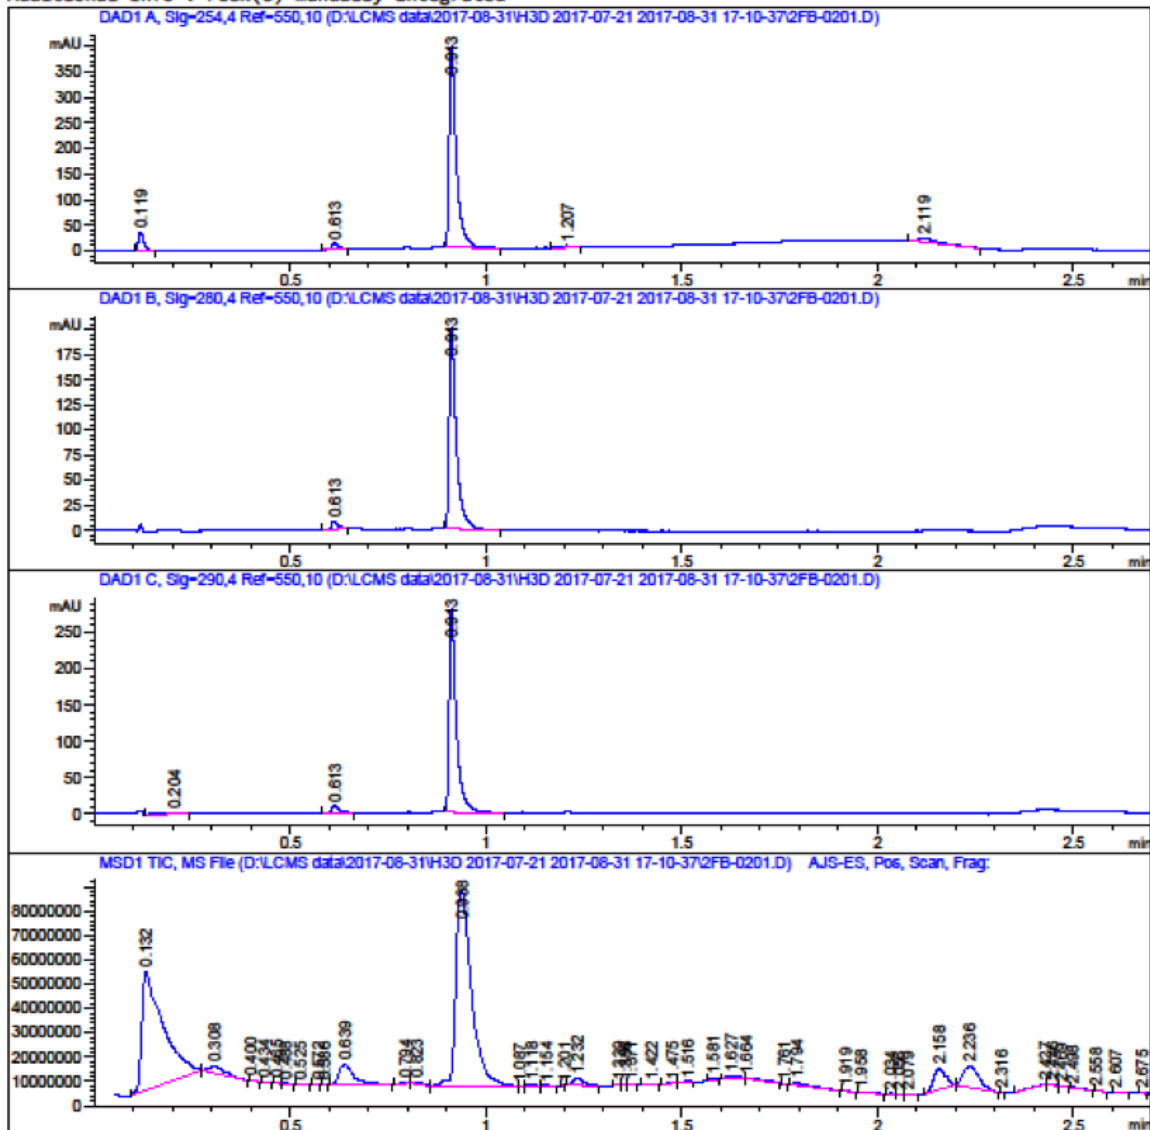

MS Spectrum

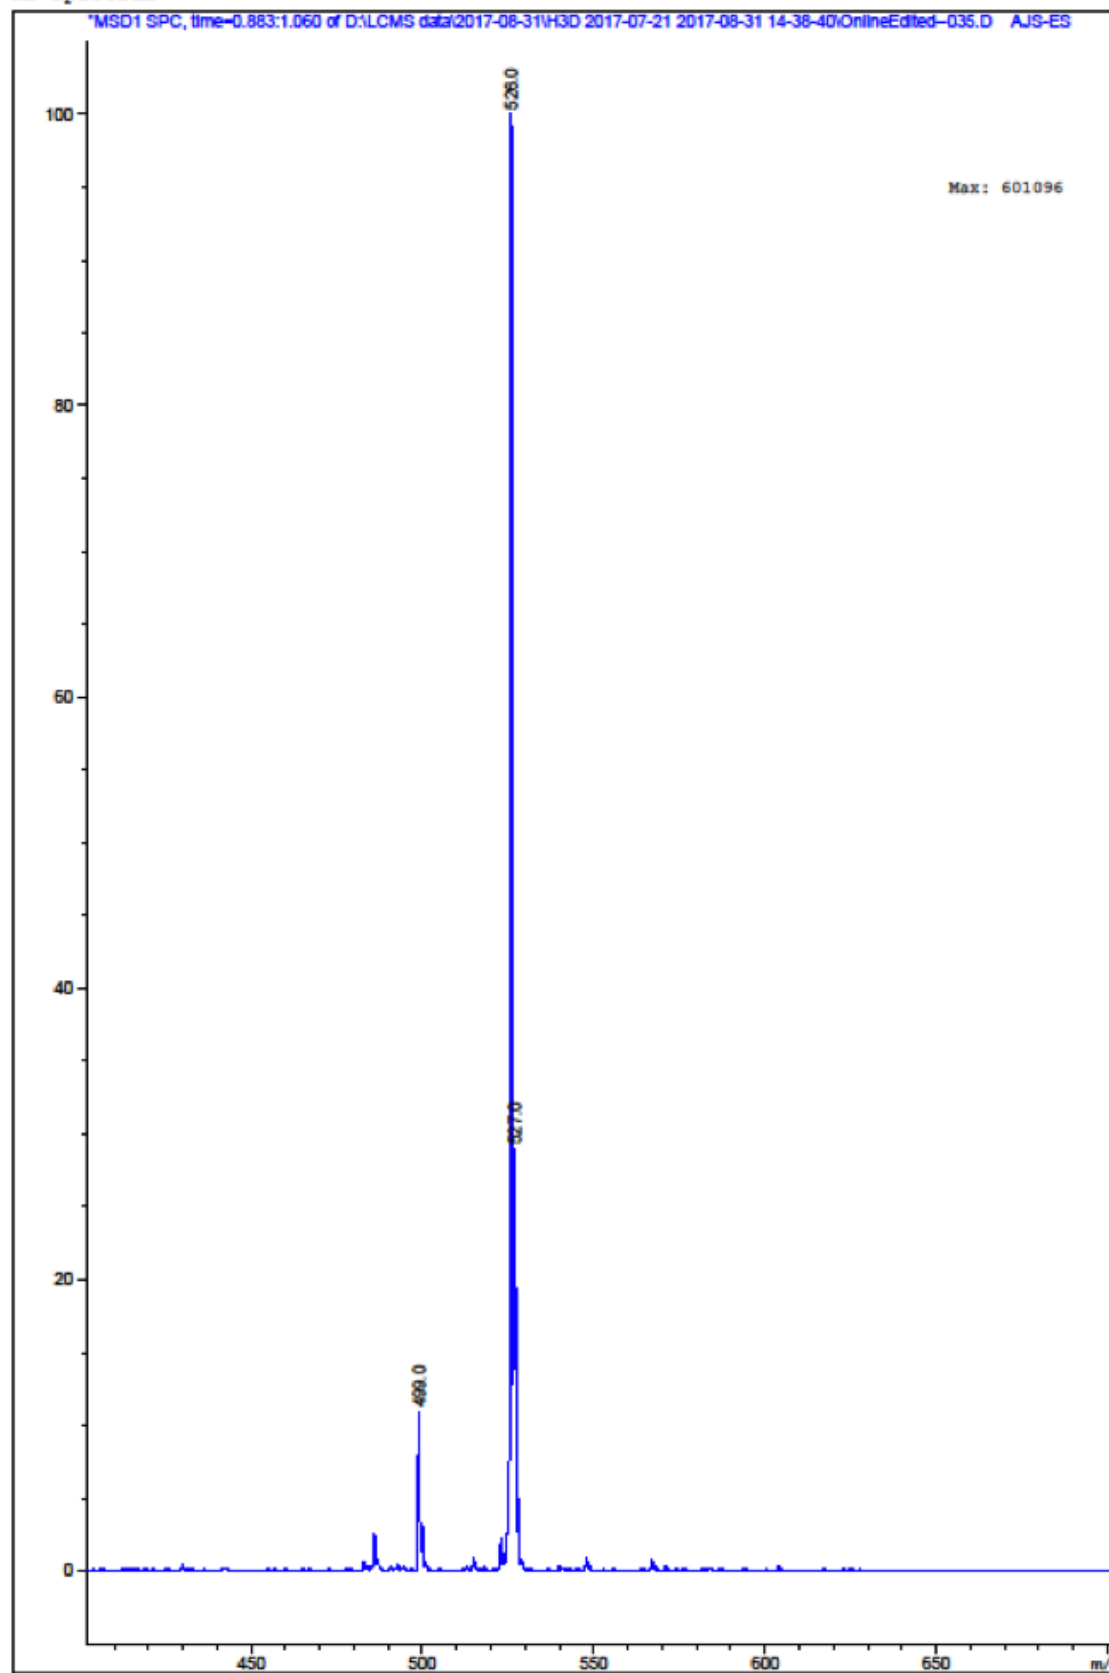

# Compound 42

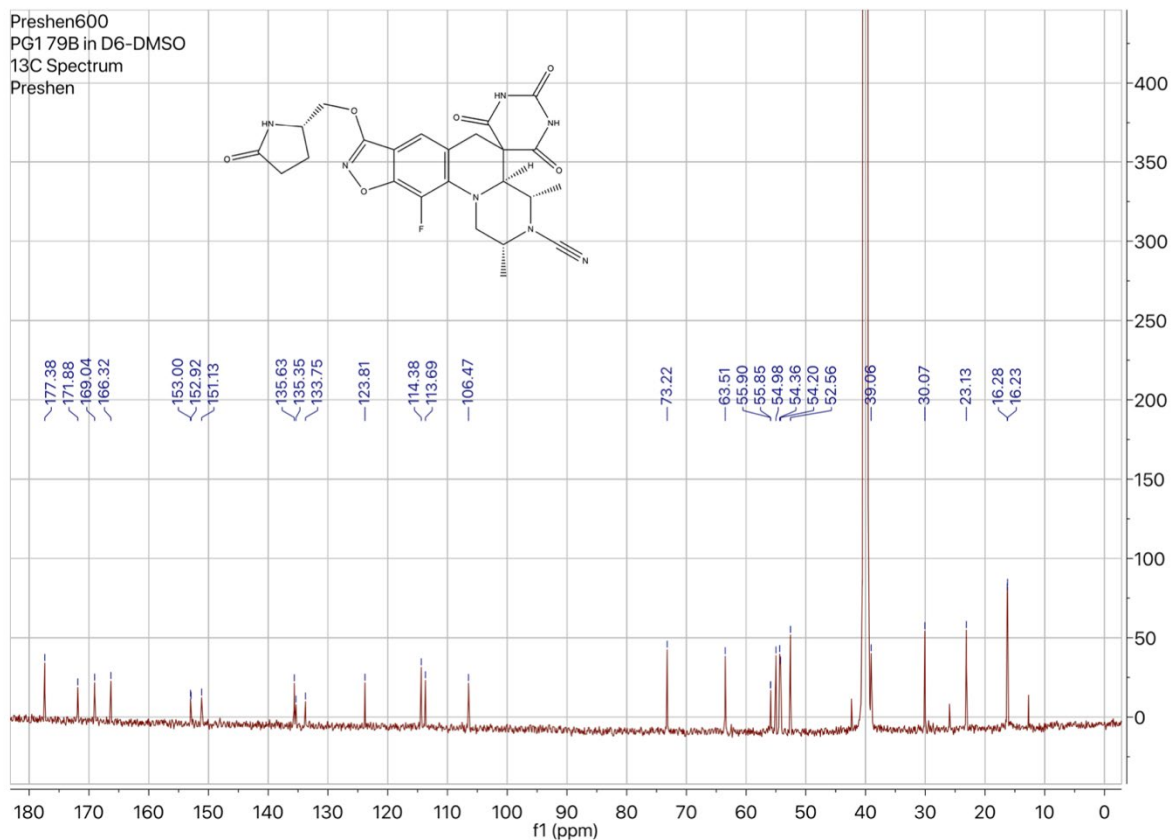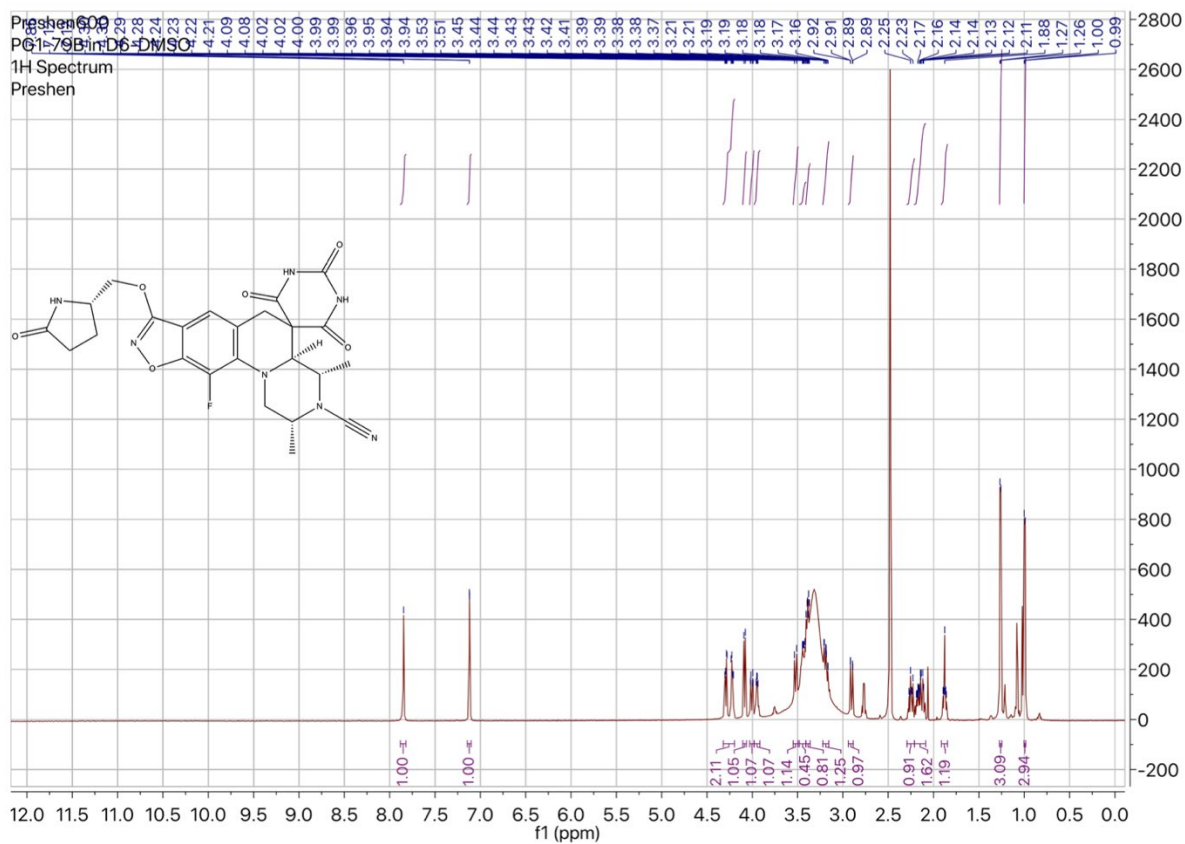

```

=====
Acq. Operator   : SYSTEM                               Seq. Line :    4
Acq. Instrument : Calimero                             Location  : P1-B4
Injection Date  : 2018-09-20 07:47:42                 Inj       :    1
                                                    Inj Volume: 1.000 µl
Method         : D:\LCMS data\2018-09-20\H3D 2018-09-20 2018-09-20 07-35-57\NEW GENERAL NEG.
                M (Sequence Method)
Last changed   : 2018-09-20 07:35:57 by SYSTEM
Method Info    : Standard 2.2min method with 254nm, 280nm and 290nm and positive ESI mode
                100-800m/z
  
```

Additional Info : Peak(s) manually integrated

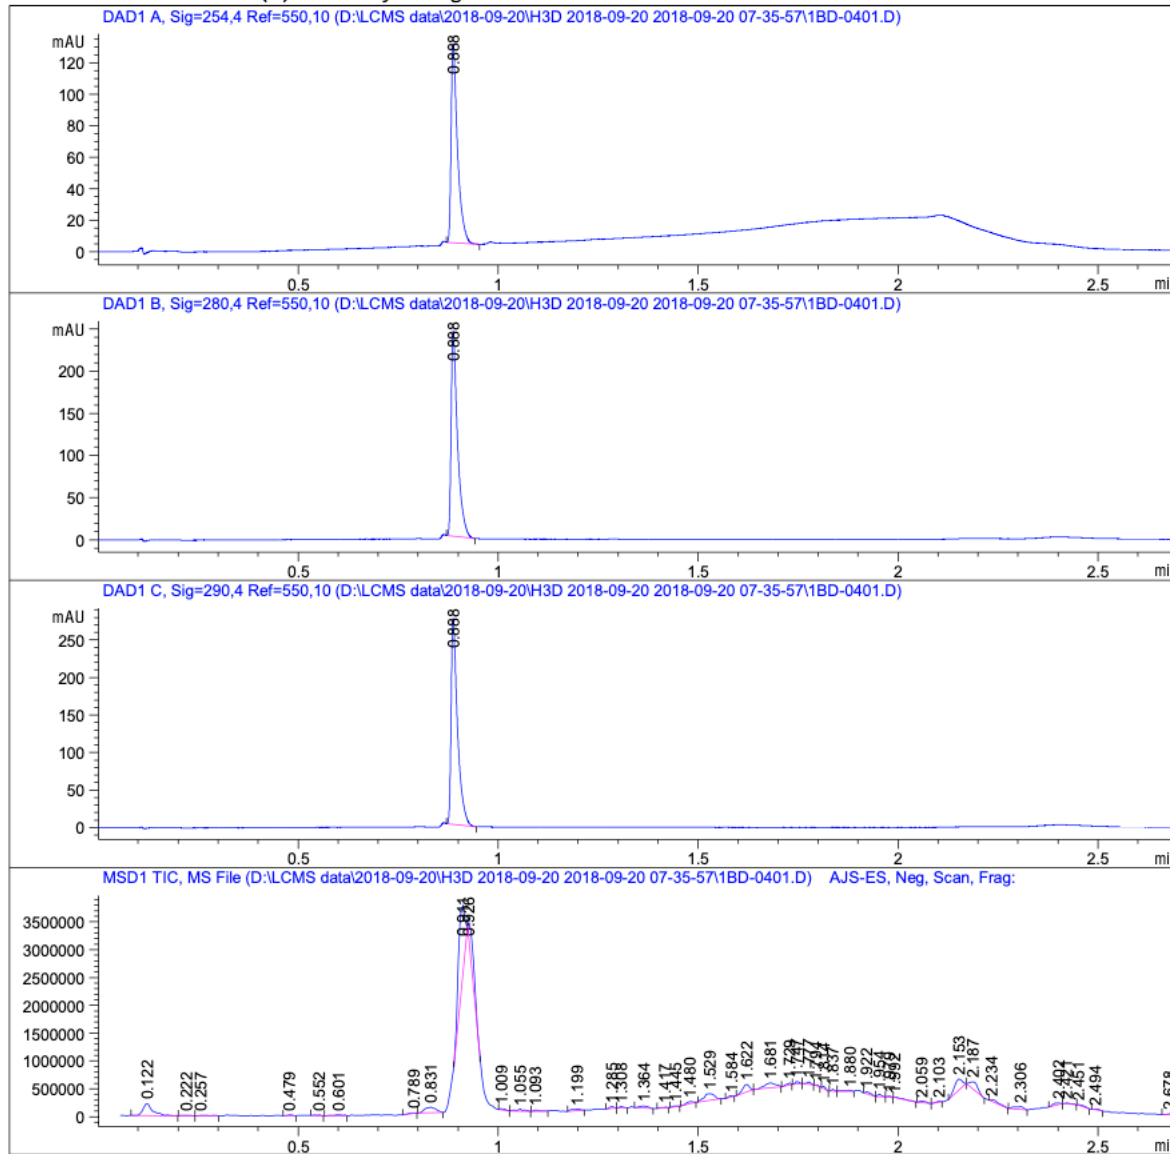

=====  
 Area Percent Report  
 =====

Sorted By : Signal  
 Multiplier : 1.0000  
 Dilution : 1.0000  
 Do not use Multiplier & Dilution Factor with ISTDs

Signal 1: DAD1 A, Sig=254,4 Ref=550,10

| Peak # | RetTime [min] | Type | Width [min] | Area [mAU*s] | Height [mAU] | Area %   |
|--------|---------------|------|-------------|--------------|--------------|----------|
| 1      | 0.888         | BB   | 0.0164      | 139.09093    | 126.17318    | 100.0000 |

Totals : 139.09093 126.17318

Signal 2: DAD1 B, Sig=280,4 Ref=550,10

| Peak # | RetTime [min] | Type | Width [min] | Area [mAU*s] | Height [mAU] | Area %   |
|--------|---------------|------|-------------|--------------|--------------|----------|
| 1      | 0.888         | BB   | 0.0163      | 266.93304    | 242.72917    | 100.0000 |

Totals : 266.93304 242.72917

Signal 3: DAD1 C, Sig=290,4 Ref=550,10

| Peak # | RetTime [min] | Type | Width [min] | Area [mAU*s] | Height [mAU] | Area %   |
|--------|---------------|------|-------------|--------------|--------------|----------|
| 1      | 0.888         | BB   | 0.0163      | 301.55054    | 273.87531    | 100.0000 |

Totals : 301.55054 273.87531

MS Spectrum

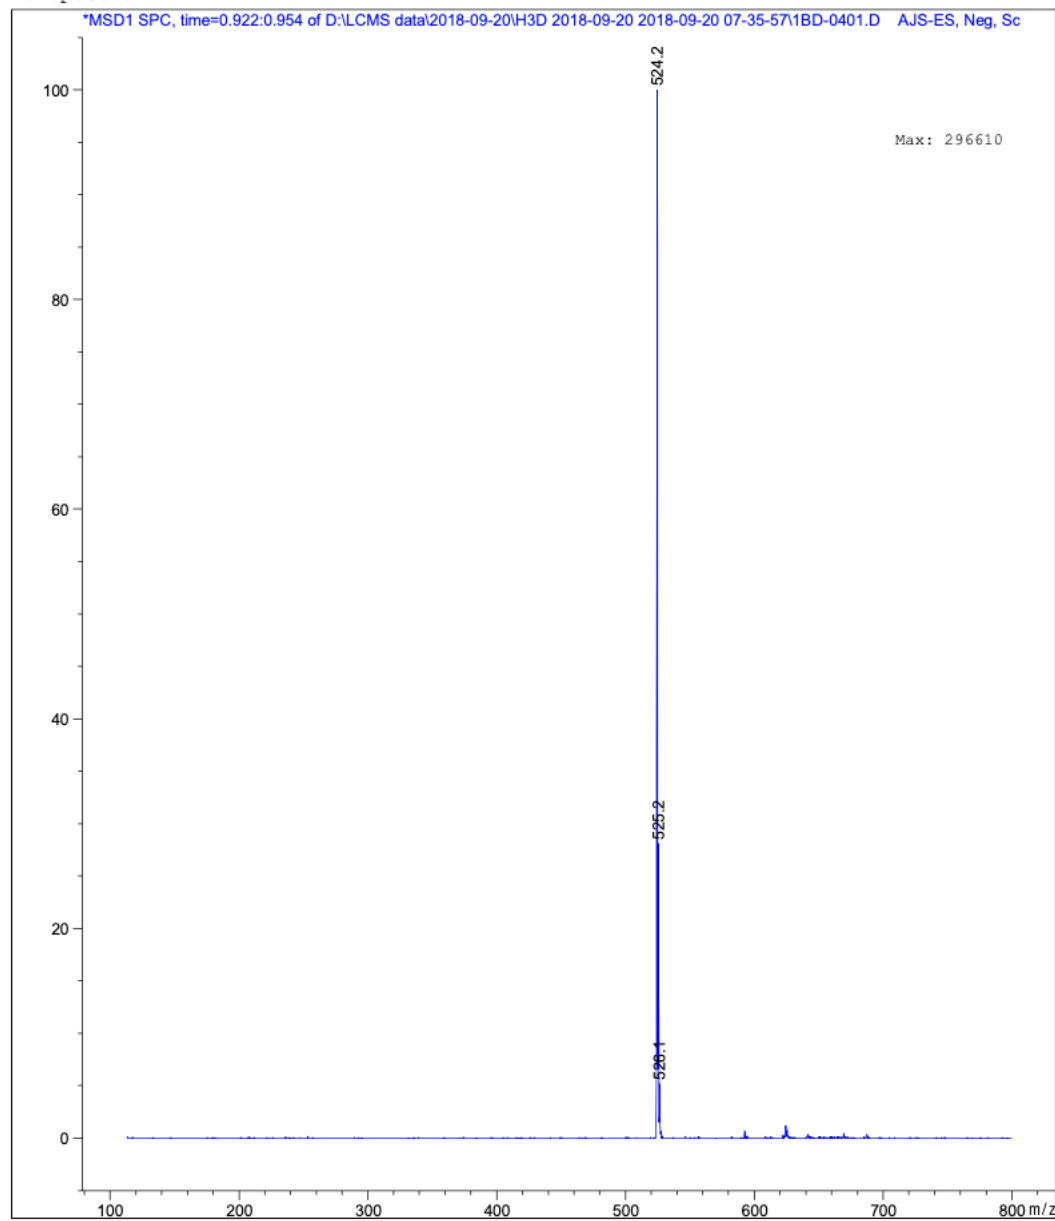

ro 2018-09-20 07:51:23 SYSTEM

Page 1 of 1

**Compound 43**

S110

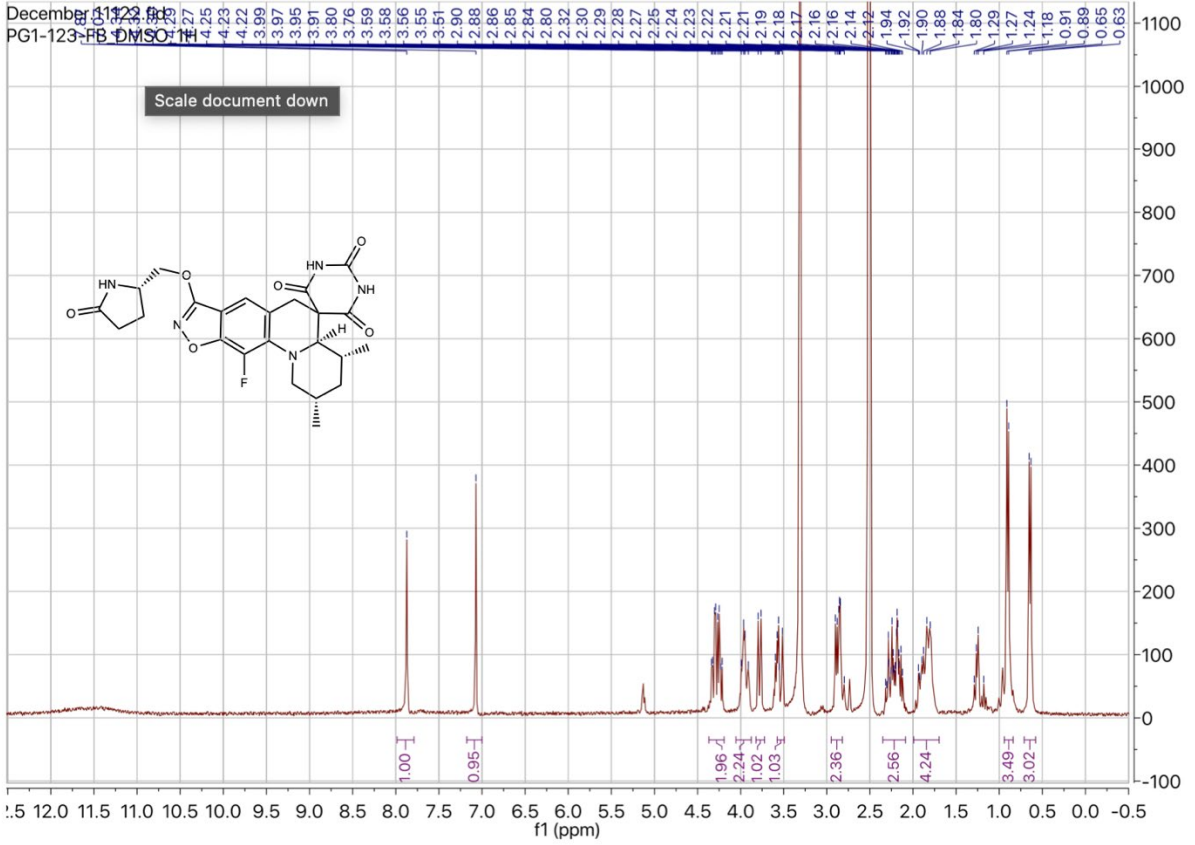

```

=====
Acq. Operator   : SYSTEM                               Seq. Line :    2
Acq. Instrument : Calimero                             Location  : P1-D2
Injection Date  : 2018-12-10 09:58:57                 Inj       :    1
                                                    Inj Volume: 1.000 µl
Method         : C:\Chem32\1\Data\2018-12-10\H3D 2018-12-10 2018-12-10 09-54-09\NEW GENERAL
                NEG.M (Sequence Method)
Last changed   : 2018-12-10 09:54:09 by SYSTEM
Method Info    : Standard 2.2min method with 254nm, 280nm and 290nm and positive ESI mode
                100-800m/z
  
```

Additional Info : Peak(s) manually integrated

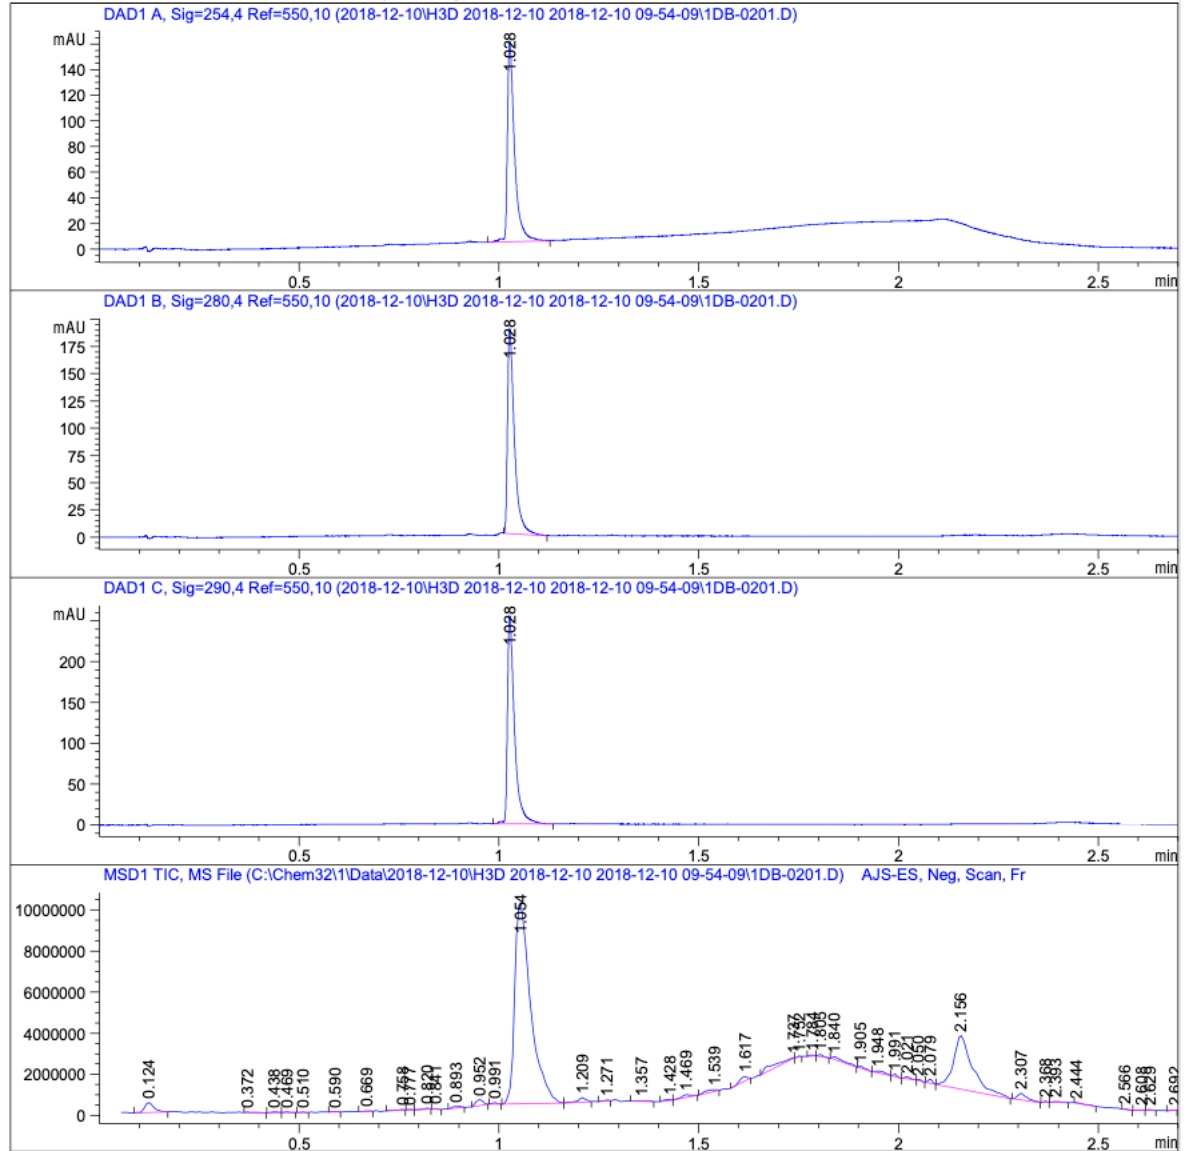



MS Spectrum

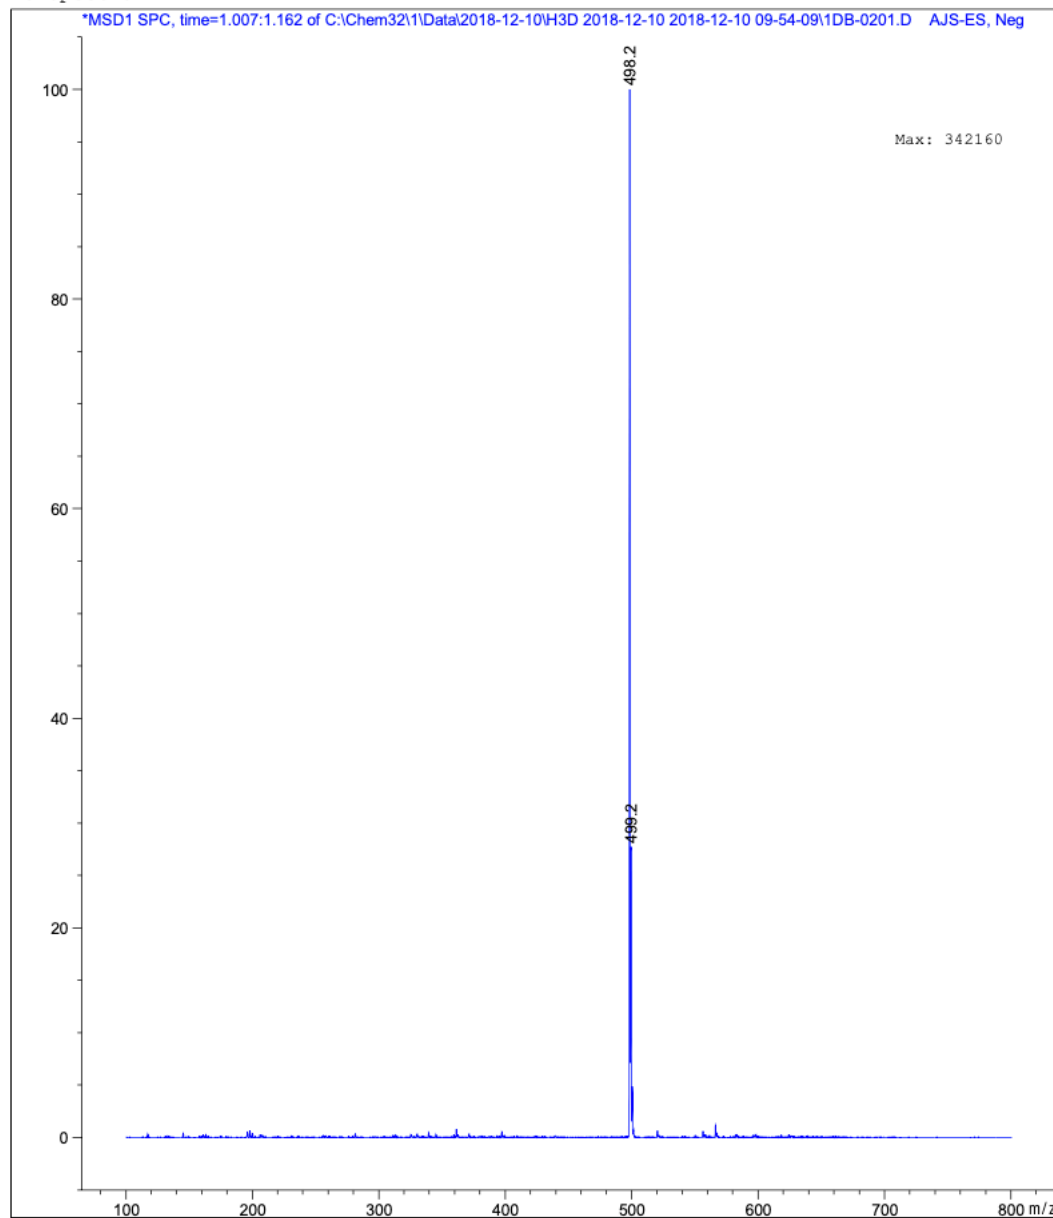

**Compound 44**

December\_6121.fid  
PG1-249-FA-P\_Major\_DMSO\_1H

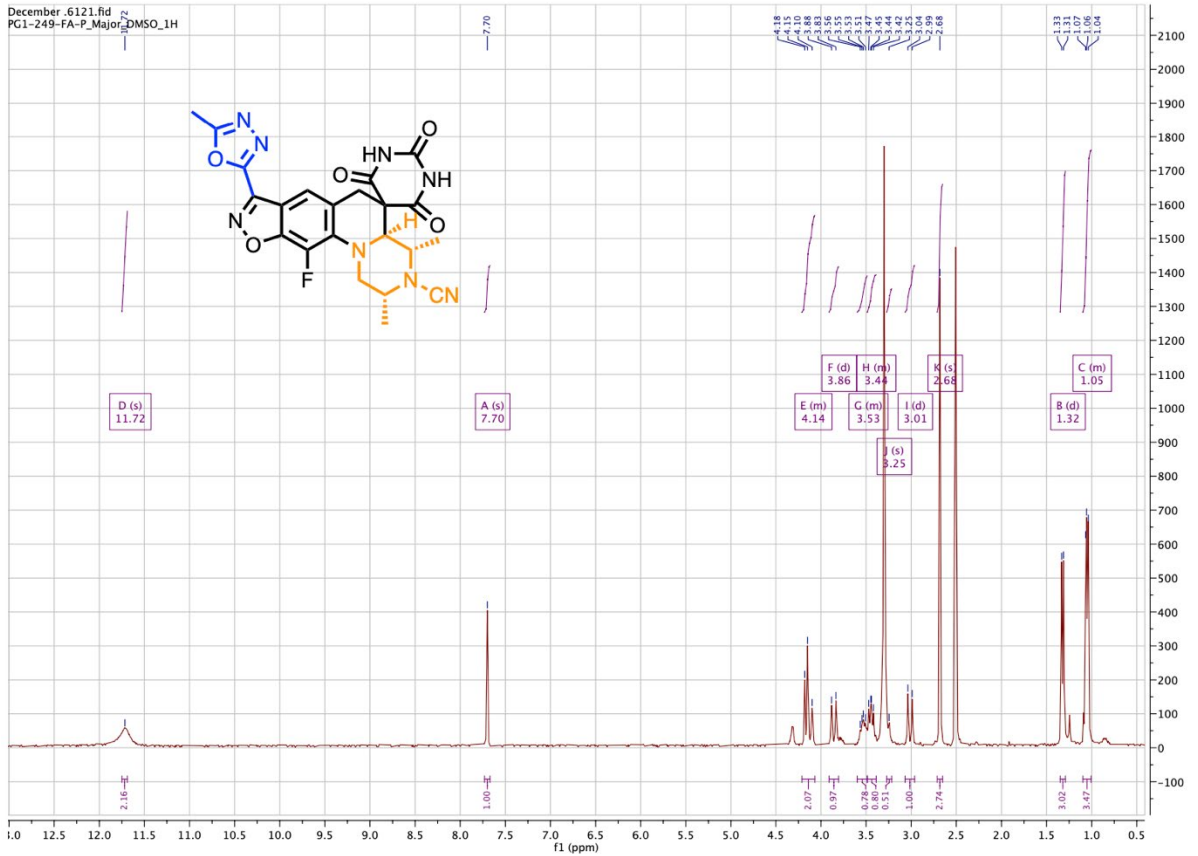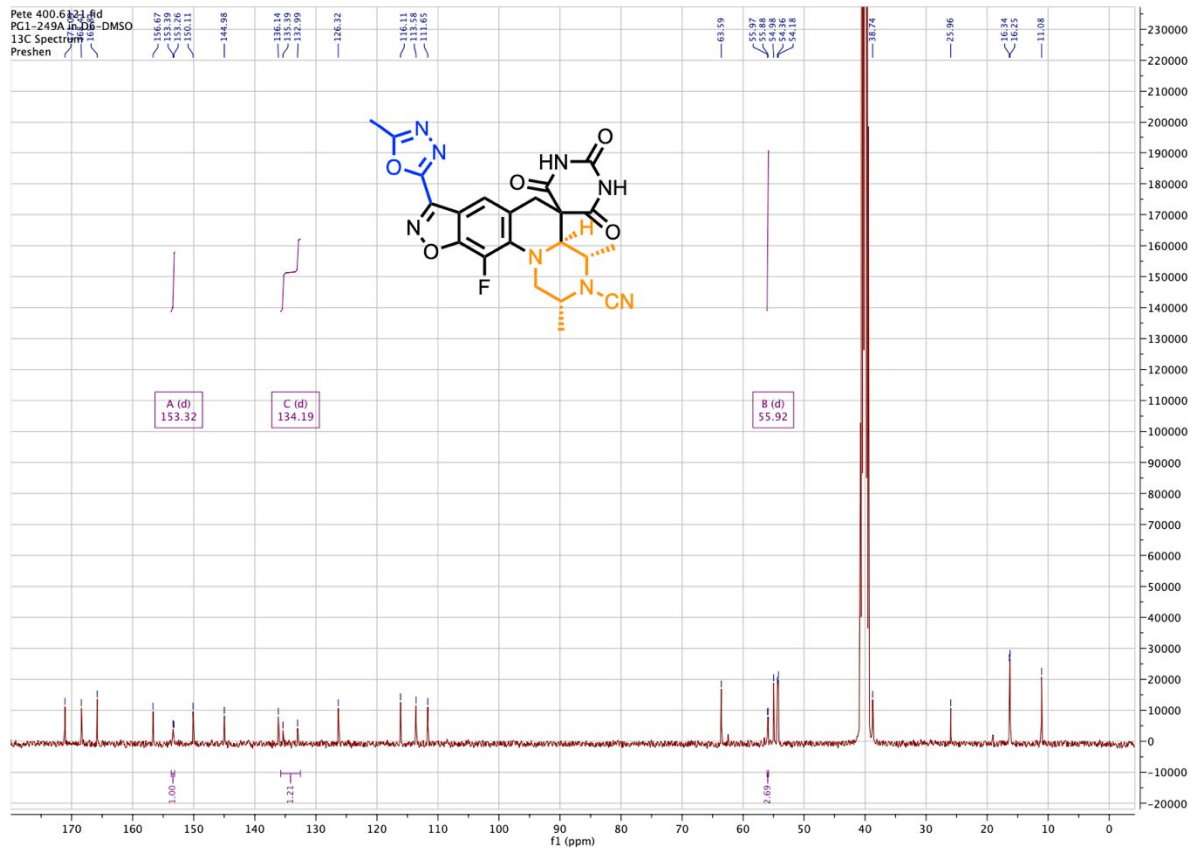

Pete\_400.6122.fid  
PC1-249A in D6-DMSO  
19F Spectrum  
Preshen

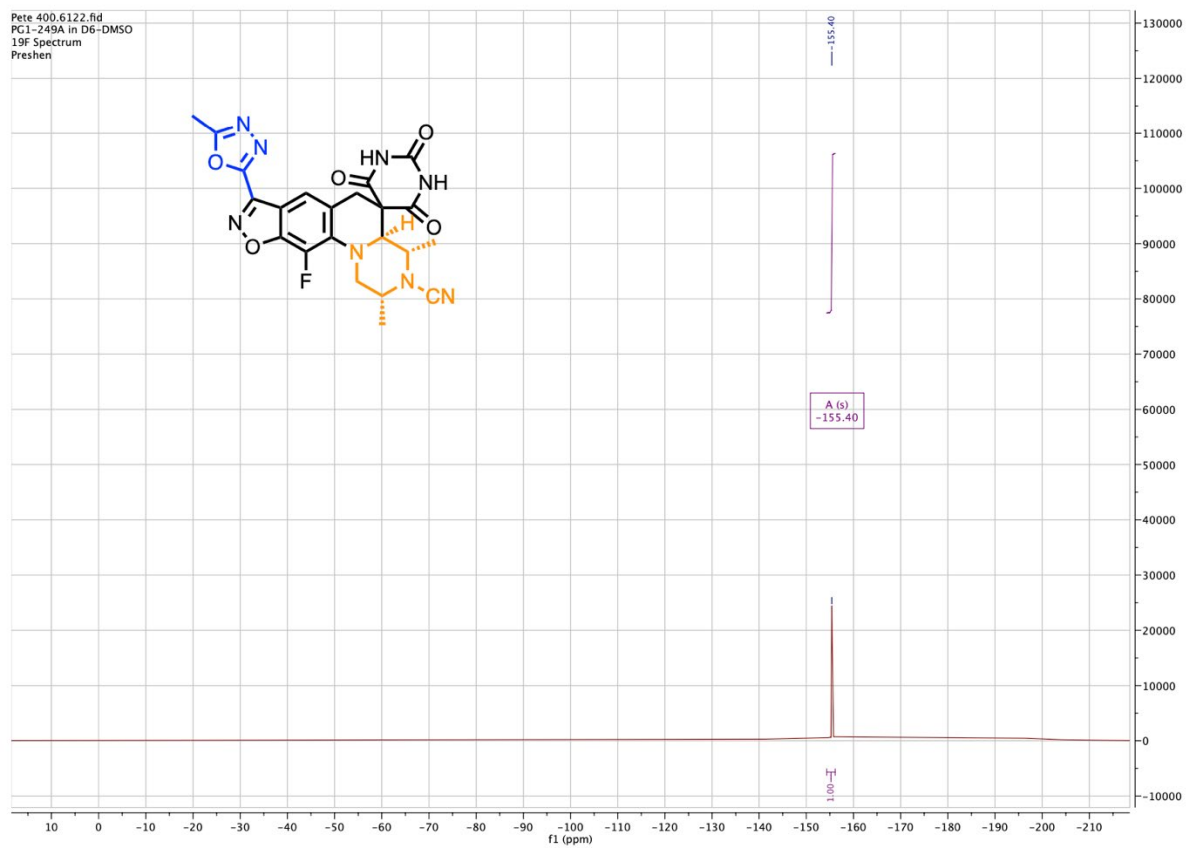

```

=====
Acq. Operator   : SYSTEM                               Seq. Line : 14
Acq. Instrument : Calimero                             Location  : P1-C4
Injection Date  : 2019-12-05 15:43:13                 Inj       : 1
                                                    Inj Volume: 1.000 µl

Method         : D:\LCMS data\2019-12-05\H3D 2019-12-05 2019-12-05 14-53-31\NEW GENERAL NEG.
                M (Sequence Method)
Last changed   : 2019-12-05 15:31:37 by SYSTEM
Method Info    : Standard 2.2min method with 254nm, 280nm and 290nm and positive ESI mode
                100-800m/z
  
```

Additional Info : Peak(s) manually integrated

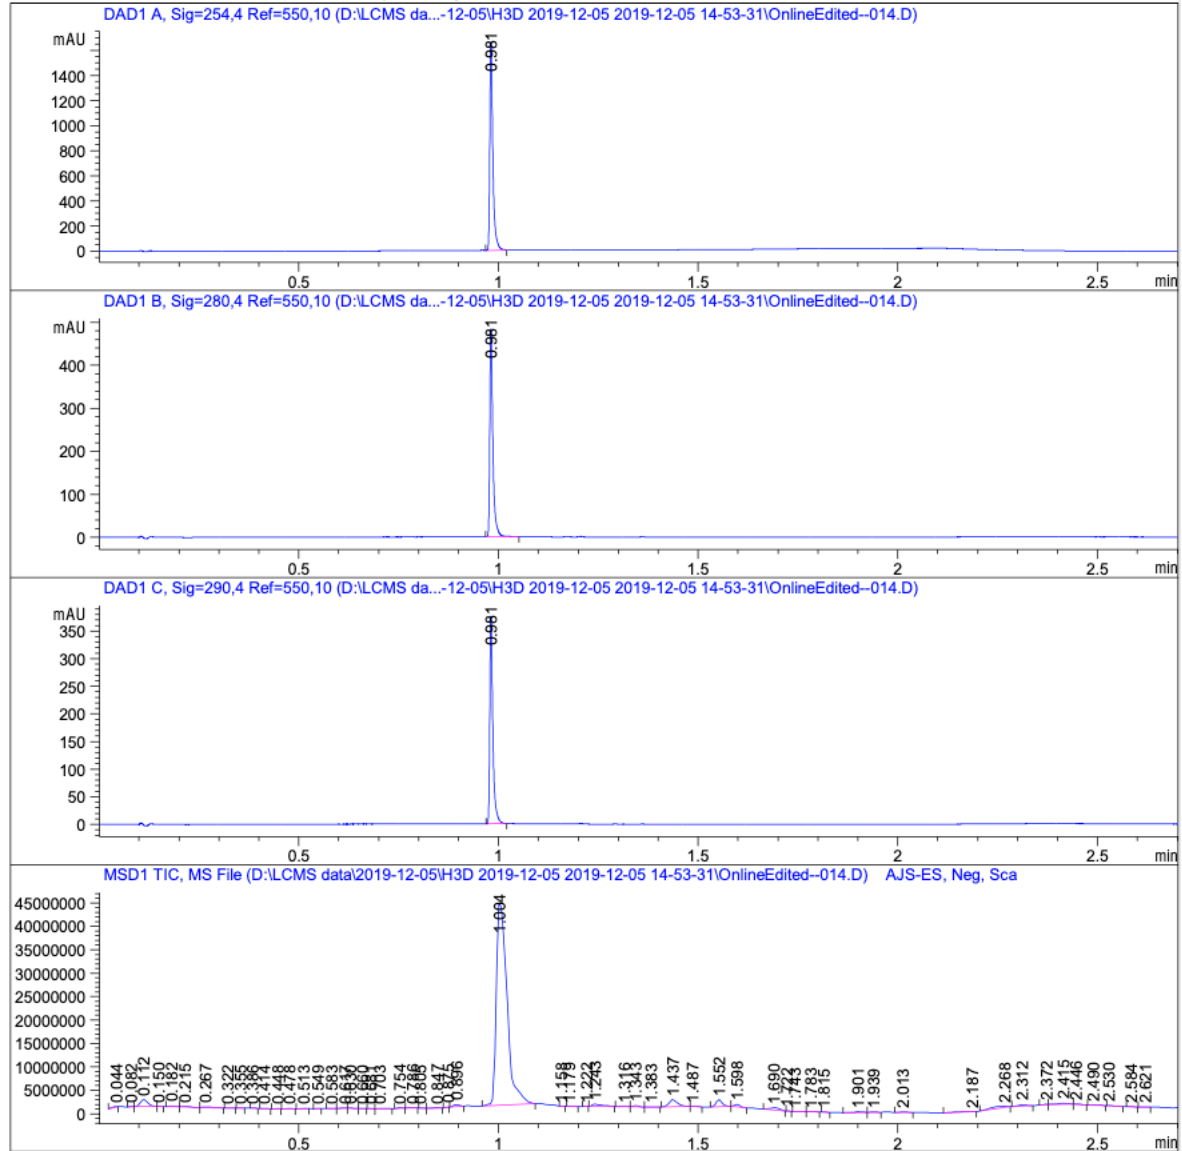

=====  
 Area Percent Report  
 =====

Sorted By : Signal  
 Multiplier : 1.0000  
 Dilution : 1.0000  
 Do not use Multiplier & Dilution Factor with ISTDs

Signal 1: DAD1 A, Sig=254,4 Ref=550,10

| Peak # | RetTime [min] | Type | Width [min] | Area [mAU*s] | Height [mAU] | Area %   |
|--------|---------------|------|-------------|--------------|--------------|----------|
| 1      | 0.981         | BB   | 8.27e-3     | 887.41132    | 1649.93152   | 100.0000 |

Totals : 887.41132 1649.93152

Signal 2: DAD1 B, Sig=280,4 Ref=550,10

| Peak # | RetTime [min] | Type | Width [min] | Area [mAU*s] | Height [mAU] | Area %   |
|--------|---------------|------|-------------|--------------|--------------|----------|
| 1      | 0.981         | BB   | 8.35e-3     | 261.20499    | 479.99350    | 100.0000 |

Totals : 261.20499 479.99350

Signal 3: DAD1 C, Sig=290,4 Ref=550,10

| Peak # | RetTime [min] | Type | Width [min] | Area [mAU*s] | Height [mAU] | Area %   |
|--------|---------------|------|-------------|--------------|--------------|----------|
| 1      | 0.981         | BB   | 8.30e-3     | 201.75490    | 373.43118    | 100.0000 |

Totals : 201.75490 373.43118

MS Spectrum

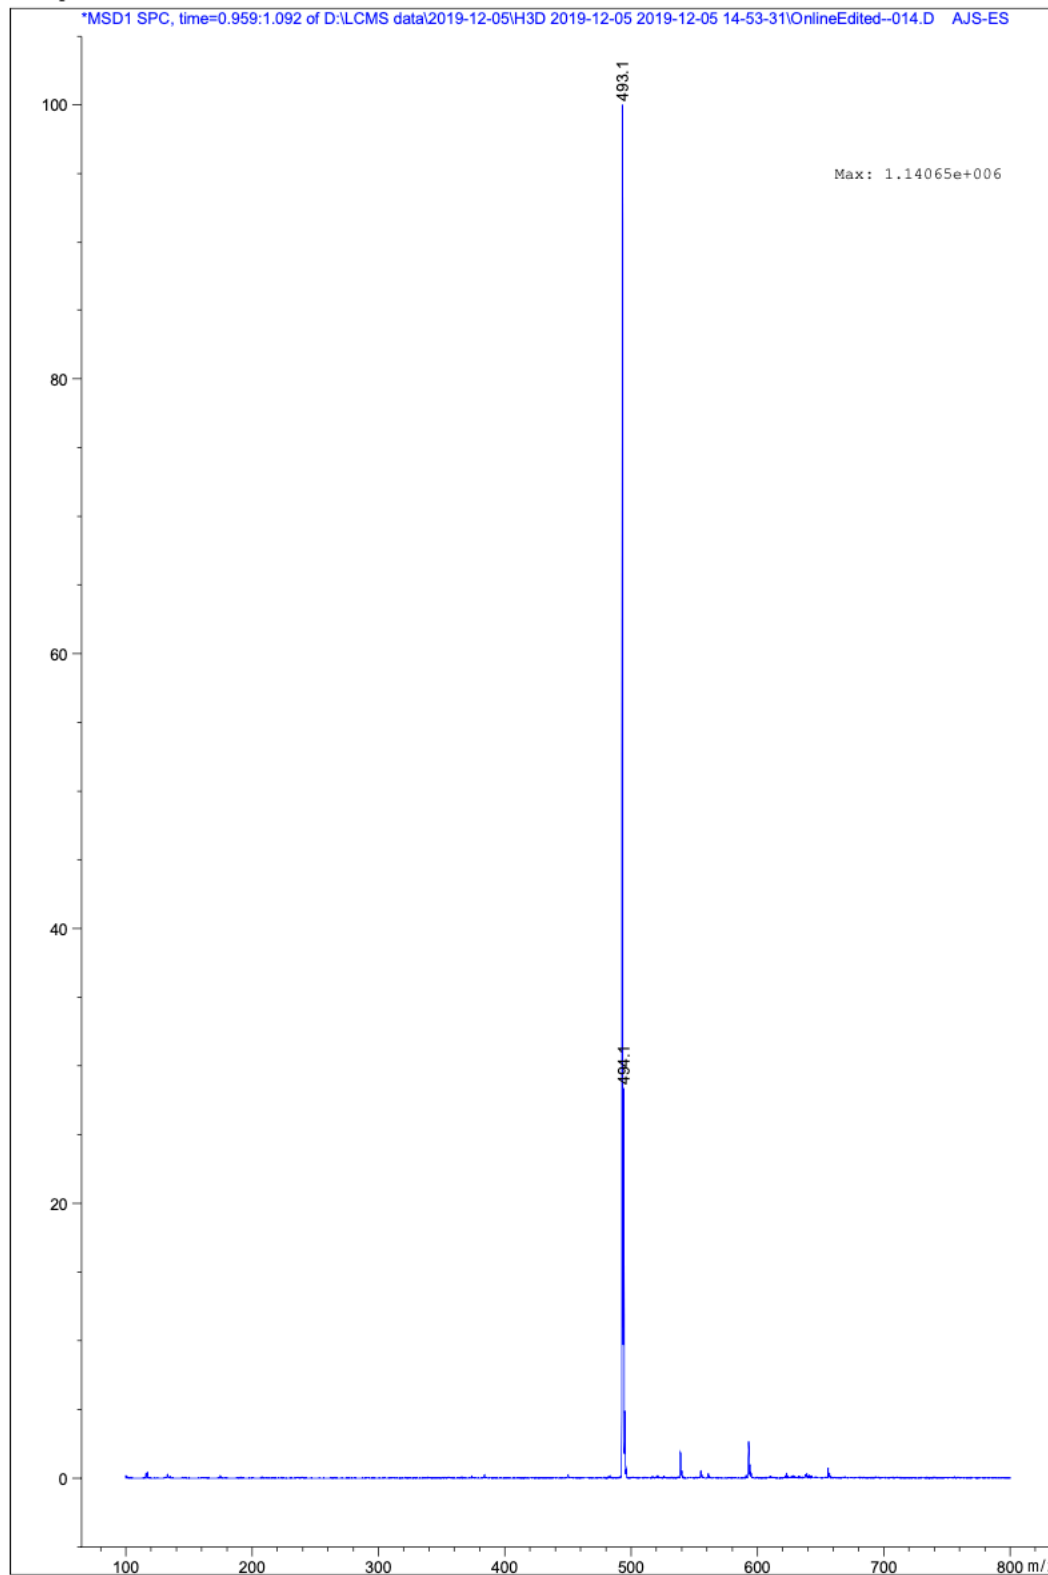

mero 2019-12-06 06:22:19 SYSTEM

Page 1 of 8

Compound 45

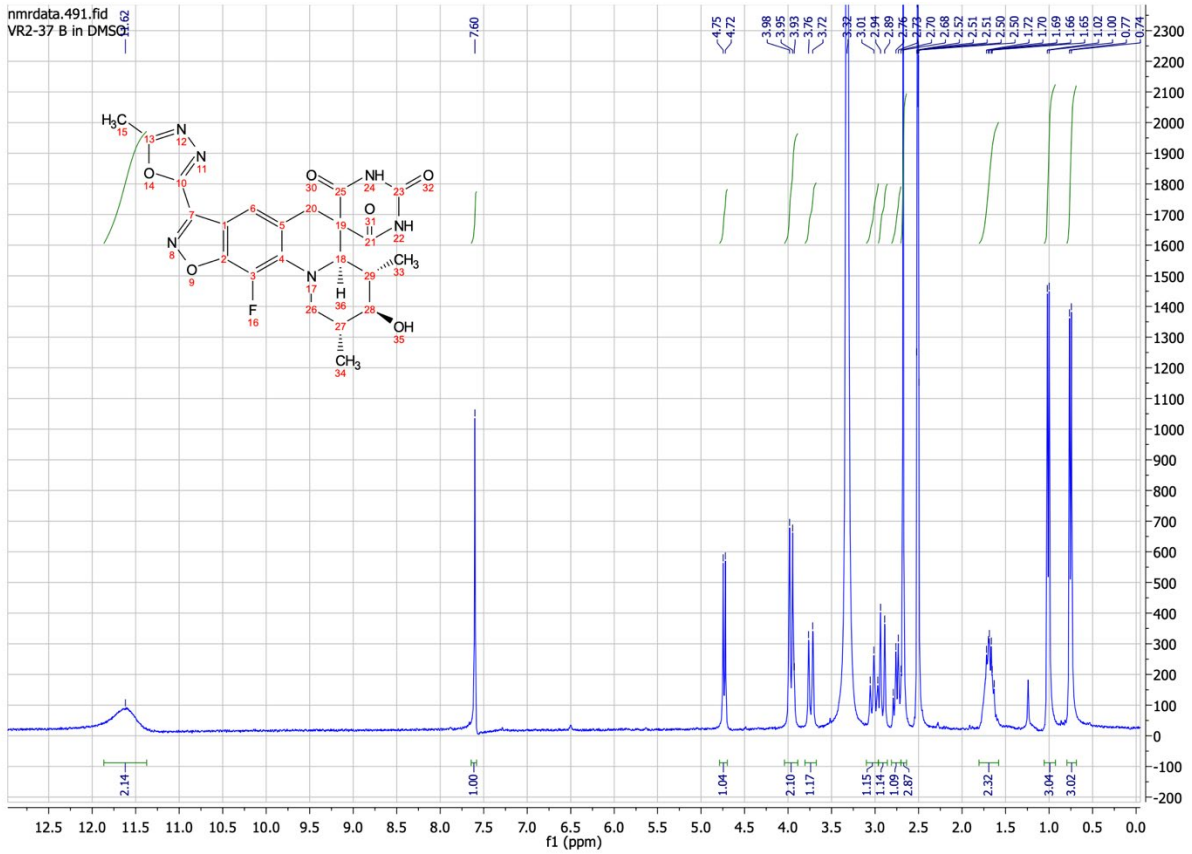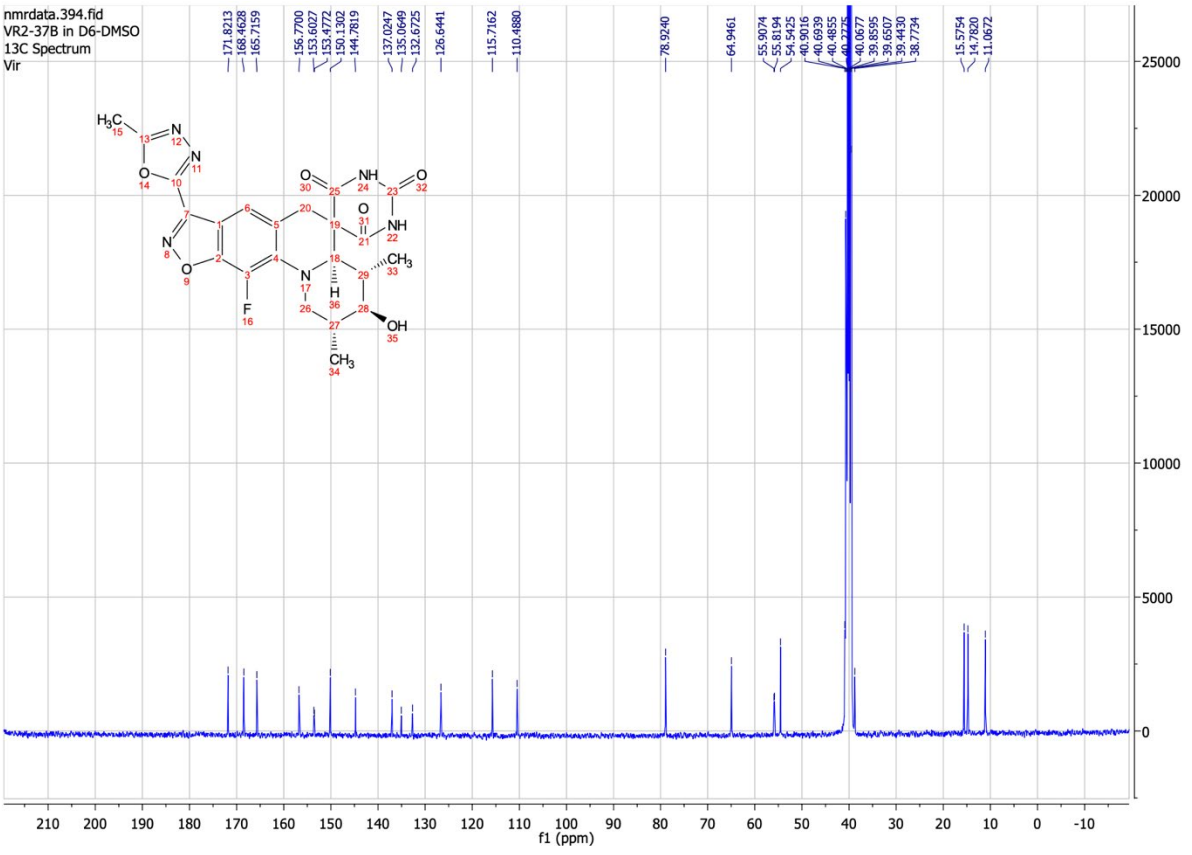

nmrdata.393.fid  
VR2-37B in D6-DMSO  
19F Spectrum  
Vir

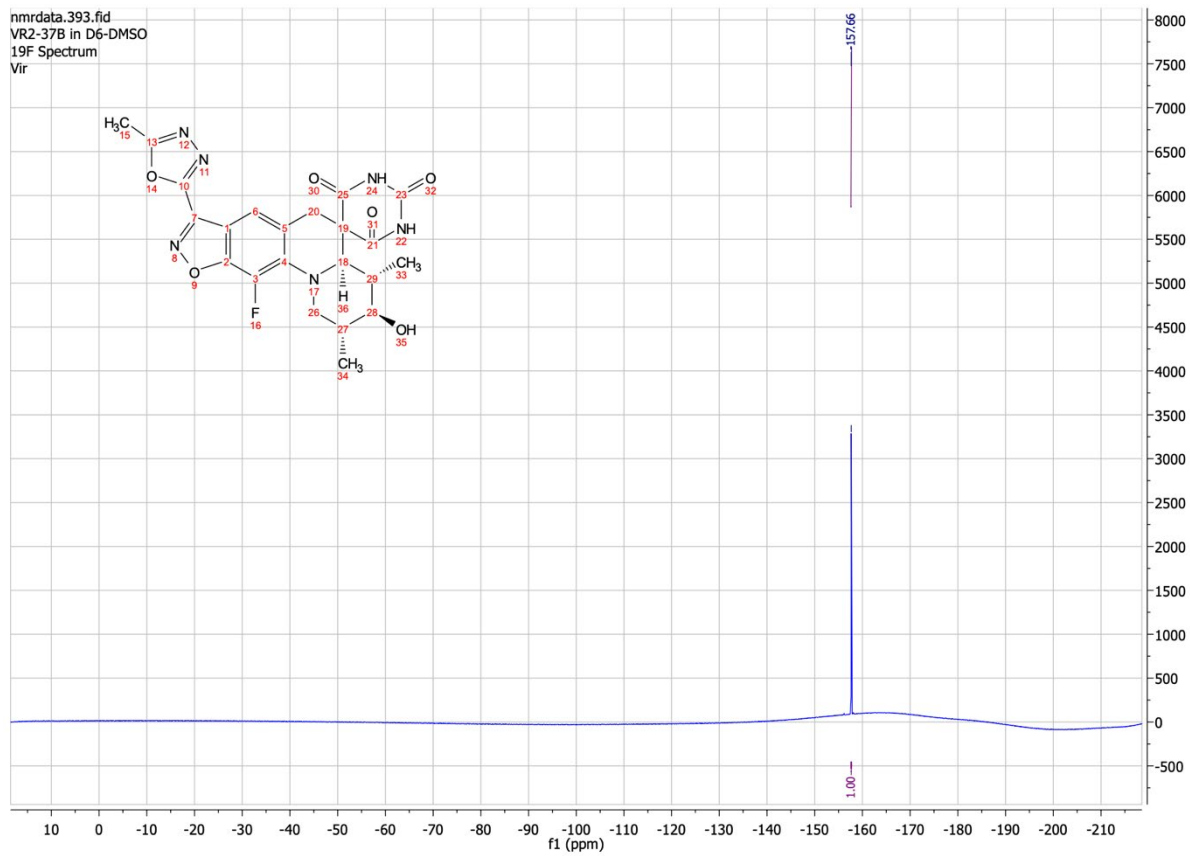



```

=====
Acq. Operator   : SYSTEM                               Seq. Line :    2
Acq. Instrument : Calimero                             Location  : P1-E2
Injection Date  : 2019-09-02 12:42:26                 Inj       :    1
                                                    Inj Volume: 1.000 µl
Method          : D:\LCMS data\2019-09-02\H3D 2019-09-02 2019-09-02 12-37-44\NEW GENERAL POS.
                  M (Sequence Method)
Last changed    : 2019-09-02 12:37:44 by SYSTEM
Method Info     : Standard 2.2min method with 254nm, 280nm and 290nm and positive ESI mode
                  100-800m/z
=====

```

Additional Info : Peak(s) manually integrated

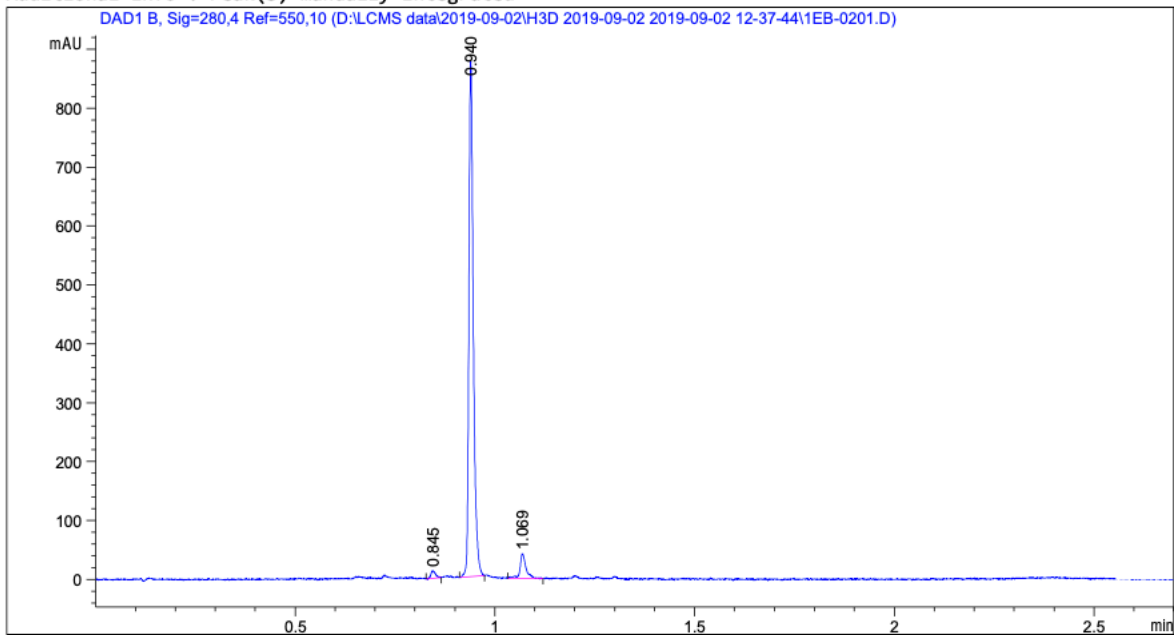

=====  
Area Percent Report  
=====

```

Sorted By      :      Signal
Multiplier     :      1.0000
Dilution      :      1.0000
Do not use Multiplier & Dilution Factor with ISTDs

```

Signal 1: DAD1 B, Sig=280,4 Ref=550,10

| Peak # | RetTime [min] | Type | Width [min] | Area [mAU*s] | Height [mAU] | Area %  |
|--------|---------------|------|-------------|--------------|--------------|---------|
| 1      | 0.845         | BB   | 0.0131      | 10.11594     | 12.92509     | 1.3672  |
| 2      | 0.940         | BB   | 0.0121      | 684.22076    | 872.96301    | 92.4741 |
| 3      | 1.069         | BB   | 0.0157      | 45.56845     | 41.96892     | 6.1587  |

Totals :                                739.90516   927.85703

MS Spectrum

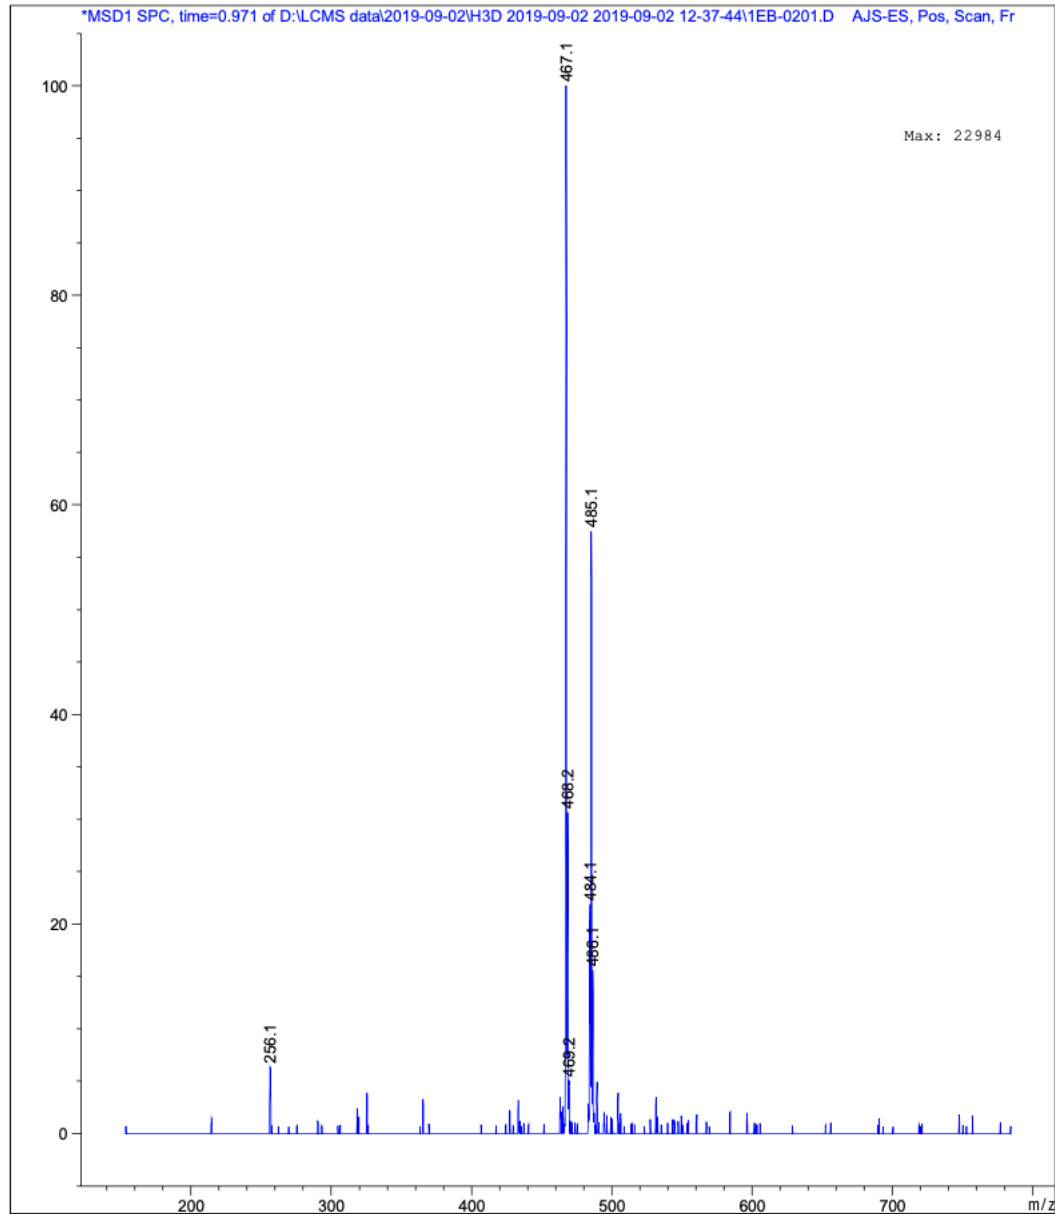

## 9. References

- (1) Hoffmann, M.; Dahmann, G.; Fiegen, D.; Handschuh, S.; Klicic, J.; Linz, G.; Schaezle, G.; Schnapp, A.; East, S. P.; Mazanetz, M. P.; Scott, R. J.; Walker, E. Substituted naphthridines and their use as syk kinase inhibitors. WO/2011/092128, 2011.
- (2) Basarab, G. S.; Kern, G. H.; McNulty, J.; Mueller, J. P.; Lawrence, K.; Vishwanathan, K.; Alm, R. A.; Barvian, K.; Doig, P.; Galullo, V.; Gardner, H.; Gowravaram, M.; Huband, M.; Kimzey, A.; Morningstar, M.; Kutschke, A.; Lahiri, S. D.; Perros, M.; Singh, R.; Schuck, V. J. A.; Tommasi, R.; Walkup, G.; Newman, J. V., Responding to the challenge of untreatable gonorrhea: ETX0914, a first-in-class agent with a distinct mechanism-of-action against bacterial type II topoisomerases. *Sci. Rep.* **2015**, *5*, 11827-11840.
- (3) Hill, A. P.; Young, R. J., Getting physical in drug discovery: A contemporary perspective on solubility and hydrophobicity. *Drug Discov. Today* **2010**, *15*, 648-55.
- (4) Alelyunas, Y. W.; Pelosi-Kilby, L.; Turcotte, P.; Kary, M. B.; Spreen, R. C., A high throughput dried DMSO logD lipophilicity measurement based on 96-well shake-flask and atmospheric pressure photoionization mass spectrometry detection. *J. Chromatogr. A* **2010**, *1217*, 1950-5.
- (5) Obach, R. S., Prediction of human clearance of twenty-nine drugs from hepatic microsomal intrinsic clearance data: an examination of in vitro half-life approach and nonspecific binding to microsomes. *Drug Metab. Dispos.* **1999**, *27*, 1350-9.
- (6) Madeira, F.; Park, Y. M.; Lee, J.; Buso, N.; Gur, T.; Madhusoodanan, N.; Basutkar, P.; Tivey, A. R. N.; Potter, S. C.; Finn, R. D.; Lopez, R., The EMBL-EBI search and sequence analysis tools APIs in 2019. *Nucleic Acids Res.* **2019**, *47*, W636-W641.
